# Supplementary material
Source: PubMed Central journal article supplement (PMC3660031)

## Supplementary Appendix

This appendix has been provided by the authors to give readers additional information about their work.

Supplement to: Herman DS, Lam L, Taylor MRG, et al. Truncation of titin causing dilated cardiomyopathy. N Engl J Med 2012;366:619-28.

## Truncations of Titin Causing Dilated Cardiomyopathy

Daniel S. Herman, Ph.D., Lien Lam, Ph.D., Matthew R. G. Taylor, M.D., Ph.D., Libin Wang, M.D., Ph.D., Polakit Teekakirikul, M.D., Danos Christodoulou, B.S., Lauren Conner, B.S., Steven R. DePalma, Ph.D., Barbara McDonough, R.N., Elizabeth Sparks, R.N.P., Debbie Lin Teodorescu, Allison L. Cirino, C.G.C., Nicholas R. Banner, F.R.C.P., Dudley J Pennell, M.D., Sharon Graw, Ph.D., Marco Merlo, M.D., Andrea Di Lenarda, M.D., Gianfranco Sinagra, M.D., J. Martijn Bos, M.D., Ph.D., Michael J. Ackerman, M.D., Ph.D., Richard N. Mitchell, M.D., Ph.D., Charles E. Murry, M.D., Ph.D., Neal K Lakdawala, M.D., Carolyn Y. Ho, M.D., Paul J. R. Barton, Ph.D., Stuart A. Cook, M.D., Luisa Mestroni, M.D., J. G. Seidman, Ph.D., and Christine E. Seidman, M.D.

### Table of Contents:

|                                                                                           |       |
|-------------------------------------------------------------------------------------------|-------|
| Description of Study Cohorts.....                                                         | 3-4   |
| Methods.....                                                                              | 4-7   |
| Segregation Analysis.....                                                                 | 4     |
| DNA Sequencing.....                                                                       | 5-6   |
| Sequence Analyses.....                                                                    | 6-7   |
| Titin Transcripts and Variants.....                                                       | 8-9   |
| Table 1: <i>TTN</i> and Control amplicon PCR primers.....                                 | 10-17 |
| Table 2: Genomic library adaptor oligonucleotides.....                                    | 17-18 |
| Table 3: Summary of cohort characteristics.....                                           | 19    |
| Table 4: Sequencing data for <i>TTN</i> truncating mutations.....                         | 20-21 |
| Table 5. Numbers of <i>TTN</i> missense variants and truncating mutations in cohorts..... | 22    |
| Table 6: <i>TTN</i> nonsense and frameshift mutations.....                                | 23-25 |
| Table 7: <i>TTN</i> splicing mutations.....                                               | 26-27 |
| Table 8: CNV validation primers.....                                                      | 27    |
| Table 9: Clinical characteristics of DCM Group A probands.....                            | 28-31 |
| Table 10: Clinical characteristics of DCM Group B probands.....                           | 32-34 |
| Table 11: Clinical characteristics of DCM Group C probands.....                           | 35-38 |

|                                                                                                                                                |       |
|------------------------------------------------------------------------------------------------------------------------------------------------|-------|
| Table 12: Clinical findings in DCM families with <i>TTN</i> truncating mutations...                                                            | 39-47 |
| Table 13: Likelihood of the odds (LOD) score reflecting linkage between <i>TTN</i> mutation and DCM in individual families.....                | 48    |
| Table 14: Previously published <i>TTN</i> truncation mutations.....                                                                            | 49    |
| Table 15: <i>TTN</i> exons comprising the standard UniProt titin protein (Q8WZ42) that have minimal or no evidence for cardiac expression..... | 49    |
| Supplemental Figure Legends.....                                                                                                               | 50-52 |
| Supplemental Appendix References.....                                                                                                          | 53-54 |
| Supplemental Figures.....                                                                                                                      | 55-62 |

## **SUBJECT COHORTS**

Study subjects with dilated cardiomyopathy (DCM) were recruited from 3 independent groups. Group A was recruited from among DCM patients clinically evaluated at the Brigham and Women's Cardiovascular Genetics Center and subjects referred directly for research genetic evaluation. Group B was recruited from UK patients undergoing evaluation for cardiac transplantation with sufficient DNA samples for genetic analyses. Group C was recruited from subjects prospectively recruited in Colorado or Italy into a Familial Dilated Cardiomyopathy Registry. Ischemic heart disease was assessed in subjects from groups A and groups C by non-invasive studies and/or cardiac catheterization. All subjects in group B had coronary arteriography. Subjects who were found to have significant coronary artery disease or who were diagnosed with DCM in infancy were excluded from study. Groups A and C were enriched for subjects with a known family history of DCM. Concurrent genetic studies of other previously identified DCM genes<sup>1-10</sup> in subjects recruited from the Brigham and Women's Cardiovascular Genetics Center, led to the identification of likely pathogenic mutations in 40 subjects. These 40 group A subjects did not undergo TTN sequencing or phenotypic analyses reported here. However, to avoid unintended inflation of the frequency of TTN truncating mutations in DCM, we increased the size of group A by 40 subjects for comparisons of mutation frequencies.

The hypertrophic cardiomyopathy (HCM) cohort consisted of 136 subjects recruited from the Brigham and Women's Cardiovascular Genetics Center, subjects referred directly for research genetic studies and 100 HCM subjects who underwent septal myectomy at the Mayo Clinic, Rochester, MN.

DCM and HCM subjects were diagnosed according to standard guidelines<sup>11,12</sup> without knowledge of genotype. Control samples (n=249) are from de-identified subjects, recruited from multiple sites, with no known history of idiopathic cardiomyopathy. There were no significant differences in the frequencies of TTN truncating variants amongst control samples from different sites.

All studies were performed in accordance with institutional guidelines and with the approval of the local ethics committees. Subjects in DCM groups A and C, all HCM, and all control subjects provided written informed consent. Within the proband cohorts, no subjects had a known familial relationship.

## **SEGREGATION ANALYSES**

For linkage studies, unknown affection status was assigned to family members of age  $\leq 40$  years who lacked criteria for DCM and/or had confounding clinical diagnoses. Logarithm of the odds scores were calculated using FASTLINK

(<http://www.ncbi.nlm.nih.gov/CBBresearch/Schaffer/fastlink.html>)<sup>13</sup>

Kaplan-Meier curves (Fig. 2D) of freedom from cardiac transplant, left ventricular assist device implantation, and death in male and female mutation carriers remained significantly different when family was used as a covariate ( $P=1.4 \times 10^{-5}$ ).

## DNA SEQUENCING

Targets for filter-based hybridization capture were defined as *TTN* exons in the UCSC hg18 refGene table (NM\_003319, NM\_133437, NM\_133378, NM\_133432, NM\_133379) or the hg18 knownGene table (uc002umr.1, uc002ums.1, uc010frc.1, uc010frd.1, uc010fre.1, uc002umz.1, uc002unb.1) +/- 10 bp and genomic intervals in the UCSC hg18 phastConsElements28wayPlacMammal and hg18 phastConsElements28way tables that were within 2kb of *TTN* and had conservation scores  $\geq 350$ . Target regions within 180 bp of one another were merged and primers were designed using ExonPrimer (<http://ihg.gsf.de/ihg/ExonPrimer.html>) or Primer3 (<http://frodo.wi.mit.edu/primer3>) with a 28 bp target gap, an optimal annealing temperature of 62°C and an optimal primer length of 22-24 bp. Filter traps were generated as previously described<sup>14</sup>, except that PCR amplimers were not confirmed by dideoxy sequencing and all DNA cleanups were performed with AmpureXP beads (Agencourt). Target amplimers, including three autosomal, three X-chromosome, and three Y-chromosome amplimers that were added at one quarter the molarity of the *TTN* amplimers, as a control for capture and copy-number, are listed in Table 1 of the Supplementary Appendix.

Genomic DNA libraries were made from 0.5 to 3 µg of genomic DNA and captured largely as previously described<sup>14</sup>. However, most samples were sheared using a Covaris E200 in single tubes (10% duty cycle, 5 intensity, 200 cycles/burst for 13 m) with a sample volume of 120 µl and most subject libraries were barcoded with a 3bp + 'T' sequence (Supplementary Appendix, Table 2), pooled in groups of 10–21, and hybridized as a pool of 2 to 4 µg.

For dideoxy sequencing, *TTN* targets were defined as all coding exons in refseq transcripts NM\_133378, NM\_00319, and NM\_133379.

## **NEXT-GENERATION DNA SEQUENCE ANALYSIS**

For next-generation sequence data, short-read sequences and quality scores were generated with Illumina Genome Analyzer Pipeline Software v1.0 to v.1.80, mapped with Novoalign V2.07.05 (<http://www.novocraft.com/>), using full Needleman-Wunsch alignment, to the hg19 human reference genome. Sequence read base quality scores were recalibrated using the genome analysis toolkit (GATK) v1.0.4418<sup>15</sup>. Sequence reads were realigned (using GATK) and duplicate masked with Picard (<http://picard.sourceforge.net/>). Single-nucleotide variants (SNV) and small indels were detected using GATK UnifiedGenotyper. Shorter single-end sequencing read lengths (32-46 bp) in 56 HCM subjects and 2 control subjects may have limited detection of insertions/deletions (especially those with sizes greater than 3 bp) in these subjects. Reported comparisons remain significant if these subjects or larger mutations are excluded (data not shown). The quality of identified nonsense, frameshift, and splicing variants was assessed using additional GATK tools and visual inspection using the Integrative Genomics Viewer<sup>16</sup>. The quality of missense variants (excluding nonsense and frameshift variants) was assessed using automated GATK tools alone.

The effect of each variant on titin RNA and protein was predicted using transcript definitions from the UCSC hg19 refGene table, with slight adaptations (see below). To identify variants likely to affect splicing, for each variant within the splice-donor or splice-acceptor sites, the

difference between the  $\log_2(\text{maximum-entropy})$  of the mutant allele and that of the wild-type allele was calculated using an existing maximum entropy model<sup>17</sup>. Twenty-seven variants were identified with a maximum-entropy difference less than -2. Twenty-three of these variants were seen either in a single subject or in subjects with the same diagnosis and were absent from the 1000 Genomes Project<sup>18,19</sup> Phase I data (629 samples; 20100804 genotypes) (1KG). However, variant c.40160-10A>G was identified in subjects with different diagnoses and present in 1KG, variant c.3100G>A was present in a subject with DCM and one with HCM, and variants c.10114+5G>A and c.30811+5G>A were present in 1KG. Excluding these four variants left 23 variants likely to substantially affect splicing (Supplementary Table 7).

In all subjects studied by next-generation sequencing, we assessed the copy-number of *TTN* amplicons by visual inspection of heat maps and quantile-quantile plots of normalized median read depths (Supplementary Fig. 4). The median read depths of each amplicon in each subject were median-normalized by both amplicon and sample. Newly identified variants were confirmed by the presence of sequence reads spanning likely DNA breakpoints and by breakpoint PCR (Supplementary Appendix, Table 8 and Fig. 5).

Forty-five *TTN* variants identified by next-generation sequencing in subjects with DCM from groups A and B, including 15 frameshifts, 17 nonsense, 12 splice, and one duplication, were assessed by independent dideoxy genomic sequencing and/or RNA sequencing and/or by restriction enzyme digest analyses (Supplemental Fig. 3 and data not shown). All were confirmed (100% validation).



## **TTN TRANSCRIPT DEFINITIONS USED FOR VARIANT ANALYSES**

The *TTN* consensus transcript sequence (Q8WZ42.nt) used to describe most variants was constructed to correspond to the protein sequence UniProtKB Q8WZ42 version 88. This transcript was defined as the combination of the UCSC hg19 alignments of RefSeq transcripts NM\_003319 (N2B) and NM\_133378 (N2A). The protein product predicted by the genomic sequence differs from Q8WZ42 at positions 17036-17043, because of a likely insertion of 'C' at position 51,102 of the cDNA sequence encoding Q8WZ42, and at several scattered single amino acids encoded by polymorphic nucleotides. The few exons (identified by black carets in Fig. 1 of the manuscript and defined in Supplementary Appendix, Table 15), with the least evidence for cardiac expression (Illumina Human Body Map 2.0 Project and unpublished) were excluded from analyses. Variants falling outside of this transcript are described using transcript definitions that include the corresponding alternatively spliced exon (novex-3, NM\_133379; novex-1, NM\_133432; novex-2, NM\_133437).

## **TTN VARIANTS IN dbSNP**

In dbSNP version 132, there are nine *TTN* nonsense SNPs (rs72646813, rs72646828, rs72646831, rs72646837, rs72646846, rs72648222, rs72648224, rs72648249, rs72648250) and two *TTN* frameshift variants (rs72647879, rs72648265) that were found by dideoxy sequencing of DCM subjects in group C (see the Methods, DNA Sequencing and Genotyping). For all other nonsense or frameshift *TTN* variants in dbSNP version 132, population frequencies are not provided and these have not been validated.

Previous studies have reported structural mutations within the M-band portion of titin in

subjects with recessive, early-onset skeletal and cardiac myopathy or tibial muscular dystrophy (Supplementary Table 14). Carmignac et al.<sup>22</sup> showed that truncated titin peptides lacking part of the M-band were incorporated into the sarcomere. We identified no TTN truncating mutations within the M-band portion in subjects with DCM, implying that M-band TTN truncating mutations may not cause isolated DCM. As such, in addition to assessing the uniformity of *TTN* truncating mutations in DCM subjects across all of titin, we also assessed the spatial uniformity of mutations when excluding the portion of titin distal to the previously reported carboxy-terminal titin truncations that do not appear to cause dominant DCM. With this exclusion the associations remained significant (data not shown).

**Supplementary Appendix Table 1: TTN and Control amplicon PCR primers\***

| <b>Amplicon</b> | <b>Forward primer</b>       | <b>Reverse primer</b>       | <b>Chr</b> | <b>Start</b> | <b>End</b> |
|-----------------|-----------------------------|-----------------------------|------------|--------------|------------|
| TTN_1#1         | TTTGAACCTGAGTTGCCTTATCTATC  | GATGTTTGCAATTTACCCTCCTG     | chr2       | 179390615    | 179391238  |
| TTN_3#7         | ACCTCAGGCGTTCCACTTGTAG      | ACCAGAATTTACCCTGCCTCTC      | chr2       | 179397970    | 179398571  |
| TTN_7#4         | TGTATTTCCAGCATCGTACCG       | GAGCAATAATGCCTTTGTGAGTC     | chr2       | 179408621    | 179409331  |
| TTN_10#4        | GGTTCACCAACTCCATTTTCTATTG   | CTTGCTGGAGTAAGCCTGTC        | chr2       | 179417865    | 179418475  |
| TTN_13#5        | CAAGCATGGTAGATTTTGTGGC      | GAGTGCCAGTAATTGCAAGGG       | chr2       | 179426342    | 179427007  |
| TTN_13#16       | GGAAATGGCTGTGGCAAATG        | CCAAAGATCTGGTAATTGAGCC      | chr2       | 179432850    | 179433487  |
| TTN_13#27       | GCCAGCTAATTGTCATTGAATCC     | GTCAAGGAGCAGACAATGCTTC      | chr2       | 179439317    | 179439989  |
| TTN_18#1        | TCCGAGATTTAAATGTGCCTCC      | TGGAGAAGTGTGATGTAAGCCG      | chr2       | 179448936    | 179449578  |
| TTN_1#2         | TGGCCGTTACACTTTGCTCTG       | GATCCATTTAAGAGGGCCTGTG      | chr2       | 179391128    | 179391749  |
| TTN_3#8         | TTACTCCAAACCGACATTTTC       | AGCACCCATGGTTGAAGCAG        | chr2       | 179398504    | 179399136  |
| TTN_8#1         | GATTGTGTGTTGGAAAATTATCTGTC  | GAATGCCAACCCCTATCCTATG      | chr2       | 179410041    | 179410682  |
| TTN_10#5        | TCTTCCTCCTCTGTCTTATCTCG     | TCTTGAAAGAATGCGAACATC       | chr2       | 179418396    | 179419027  |
| TTN_13#6        | CATTGAAAGTATGGAAAGGAAGCTC   | TCCAAAACAGCTTTTGTAAACGTC    | chr2       | 179426939    | 179427599  |
| TTN_13#17       | ATCTTGCCAACCTGTACTACTG      | CTGTGAGAGTTCTGGACACGCC      | chr2       | 179433417    | 179434075  |
| TTN_13#28       | CTTTGGCAATGACCAGTTTCTG      | AAAGTGGCTTTGTGAACGTCAG      | chr2       | 179439920    | 179440588  |
| TTN_18#2        | CTTTCCAACCTGCAGGAAG         | TGCACCAAGTATAGCTCACC        | chr2       | 179449499    | 179450149  |
| TTN_1#3         | TTCAGAAAGATTAGTCCGTGTGAAAC  | TCCAGCAGCTTTATGGGAATATC     | chr2       | 179391664    | 179392251  |
| TTN_3#10        | CAAAAGCACTTGTGTTAATGCG      | CGAGATTCTGTCAACTTAACATGG    | chr2       | 179399614    | 179400235  |
| TTN_8#2         | TACTGCCCTCACTCGGAATATG      | GAACTGGATGCCCGATTACAC       | chr2       | 179410608    | 179411215  |
| TTN_11#1        | AAAGCATATGCACAGGTTAGCG      | GGTGTGAATACAGACCACTGTC      | chr2       | 179419104    | 179419588  |
| TTN_13#7        | TATGGTCAAATTCACAGGGGC       | GTGCGTGTGATGCCTTGTATC       | chr2       | 179427534    | 179428171  |
| TTN_13#18       | TGTGACTTTCAGGTTAACAGGTGG    | CTTCTGCTTACAAAAGGCTTG       | chr2       | 179434026    | 179434681  |
| TTN_13#29       | ATGTCTGTAGGCCGAGGTTG        | TTGTTTCTTCTCAGATCCTCCAG     | chr2       | 179440519    | 179441158  |
| TTN_19          | CATGTGTTTGAAAGCCACTGTTT     | TTCTATGTACATTGGAGCAAATCC    | chr2       | 179451093    | 179451640  |
| TTN_1#4         | CCTCTACCAGTAATTTTATTGCTCACC | TGCCGTGTAACATTTATTTGCAG     | chr2       | 179392147    | 179392788  |
| TTN_3#11        | TTTGCTGCCACCATCAGAGG        | GATGCCACAGTTTACCAAGTCAG     | chr2       | 179400182    | 179400784  |
| TTN_8#3         | TCAGAACCTGCTCTGATGGTAAC     | CGAAGCTTCAAGACCTATAATGGC    | chr2       | 179411163    | 179411767  |
| TTN_11#2        | GTGGGCTGGTTTGTCTATCAG       | TGCATAGAATTATAATGATGGTGTGTG | chr2       | 179419465    | 179420011  |
| TTN_13#8        | AGTGTCCTGACTTTTGGATTG       | TCAGCAATGTTGGTGTACAAAG      | chr2       | 179428113    | 179428807  |
| TTN_13#19       | TGGTTATGTCTATGACTTTGGGG     | TCAAGGTTCTTGACAGACCAGG      | chr2       | 179434604    | 179435263  |
| TTN_13#30       | TGGTAGTATCAGTGACATGCGG      | CATGTGGCAACCAAATTATCC       | chr2       | 179441099    | 179441767  |
| TTN_20#1        | TTTTAGTATGGATTGTCTCCAATG    | GGATGCCCTATTCTGCTCTTTG      | chr2       | 179451608    | 179452471  |
| TTN_2#1         | GTTTTCTGTGCTTGAAAGAGAGG     | CAGCGATCAGACCCTAACCATC      | chr2       | 179392920    | 179393507  |
| TTN_4#2         | GCTGGACTTTGTATTTCCAGC       | TGTGCTCATTGAATCCCTATTTACC   | chr2       | 179402120    | 179402834  |
| TTN_8#5         | GCGCTTGACACTGGAATTGAC       | GTTGAAGCTGGTCACACCAAAC      | chr2       | 179412258    | 179412872  |
| TTN_12#1        | GGAAAAGGTATGCGGAAATACTG     | GCTGGAGTTGGAAAACCTAGCC      | chr2       | 179421510    | 179422037  |
| TTN_13#9        | CTCCAGTAACCTTCAGAGGCC       | CAGAATGCTTTGTTGCTCGTG       | chr2       | 179428715    | 179429374  |
| TTN_13#20       | TATGATGCTACTCCACCATCC       | GGCAAGCCGAGTAAAGTATCAG      | chr2       | 179435145    | 179435885  |
| TTN_13#31       | CAGTTTCTCTTTGCCATAGTG       | TTGCAAGGATGAATACGGTAGG      | chr2       | 179441686    | 179442345  |
| TTN_20#2        | GGTAGAATTGGGGATGACAAGG      | AGCAACTCTTAATCTCAAGCACAG    | chr2       | 179452325    | 179453234  |
| TTN_2#2         | TTGCTTATGCAAGGTGAGGATTC     | CAAAAGTGAAGTGAAGTATTAGG     | chr2       | 179393439    | 179394100  |
| TTN_5#1         | CCAGGGTTCTACTTAGTATAGAGGGG  | CACAGAATGATGTTGGCCTGAG      | chr2       | 179403182    | 179403741  |
| TTN_8#6         | CATTCTTGGCCTTCACACGG        | ACCCTCACTGTGAAAACCTGC       | chr2       | 179412782    | 179413415  |
| TTN_12#2        | CATCAATTGCCAAGACTGGTTC      | GTTGCAAGAACCATGATGAAAG      | chr2       | 179421986    | 179422507  |
| TTN_13#10       | CATTTCAAGTGTGACATTGTTTCTTG  | TCGTTTTAGAAAAGCCTGGACC      | chr2       | 179429287    | 179429956  |
| TTN_13#21       | ACCGTCATAGGTGGGTTTCTTC      | TATCGTCTTGACAAAACCGGG       | chr2       | 179435757    | 179436450  |

|           |                             |                             |      |           |           |
|-----------|-----------------------------|-----------------------------|------|-----------|-----------|
| TTN_14#1  | ACATGTTCAACTGTTCTCAGGG      | TGGCACCAGGAAGGAACTATC       | chr2 | 179443260 | 179443870 |
| TTN_21#1  | TTTATCGAATACTTCTGTGCTTGAG   | AGCCTGGTCTCTGTGAGAAATC      | chr2 | 179453197 | 179453861 |
| TTN_3#2   | TAAAGGCTTGCCCCATAAATTG      | CACCAAGTGACCACCACAAAG       | chr2 | 179395204 | 179395819 |
| TTN_5#2   | GGATCTTTGCAAACAACCTGGTTC    | GGTGGTAAAAGGCCTCAAAGAG      | chr2 | 179403678 | 179404227 |
| TTN_8#7   | ACCACTGTTGTTTTCCACAGTAAG    | GAAAATGCTGCAGGAGTTGGAC      | chr2 | 179413344 | 179413961 |
| TTN_12#4  | ACTTTGGGAAGTGGTTTTCCAG      | TGGTTCAGAAGCAAATGGG         | chr2 | 179422854 | 179423522 |
| TTN_13#11 | GAGGTTCCCAAGATATGACTACAAAG  | TGAAAGCTGCTGAACCTCCTTC      | chr2 | 179429870 | 179430535 |
| TTN_13#22 | CTTCCACCATCATACTTGGGTG      | AAGCATCAGAACGACCTCTTCC      | chr2 | 179436343 | 179437024 |
| TTN_14#2  | AAATTTGATTGGTCCAGTGGG       | GAATATACCTTCAGAGTGAGTGCTGAG | chr2 | 179443798 | 179444372 |
| TTN_21#2  | TCTGGTGGATCCCAGCAAAC        | TAAAGTGGCGGAGGCCTGAC        | chr2 | 179453786 | 179454392 |
| TTN_3#3   | ATCGGAAGCCTGGACTGAAGAG      | AGTCCTCACCTGGAAATTCTG       | chr2 | 179395757 | 179396357 |
| TTN_5#4   | GTCTGATGACGCCACCTTGC        | GGTGGCACAGCTAATTTTCAAC      | chr2 | 179404622 | 179405162 |
| TTN_8#8   | GACCACTGTGGGAGGACCTG        | TTGTGCTCCATAACCCACTAC       | chr2 | 179413869 | 179414505 |
| TTN_13#1  | GAATAGTTTGGGGTGTGAAGGG      | CCCAGTGATAGCTCTGACCCTC      | chr2 | 179423908 | 179424653 |
| TTN_13#12 | ATAAGTGATGCACTGGTCTGGG      | GTGAGGCTACATCAGTTCCTGG      | chr2 | 179430460 | 179431144 |
| TTN_13#23 | CTAGAATTCGGCTGCCTCCATC      | TGGAAGTCCAAAGGCTGAAGAC      | chr2 | 179436911 | 179437617 |
| TTN_14#3  | AACATCATCCCTTGCCACAAC       | CCCATTATTGATGGCGGAAG        | chr2 | 179444289 | 179444882 |
| TTN_21#3  | ATGACAGATTTGGACTGCCACC      | GGCAGACCTGAACCAGACATAAC     | chr2 | 179454345 | 179454948 |
| TTN_3#4   | CGGTAGGTTCCACTGTCATCAG      | AAATCAAGGCGACAAAGAGAAG      | chr2 | 179396304 | 179396938 |
| TTN_7#1   | GGTTTAGAAACCTGAGAAAAGGAGG   | ACAATGCCTCAGAAGACCATCC      | chr2 | 179406827 | 179407653 |
| TTN_9     | TACCATTTTACAGGCCAGGGG       | TCCATGGATGATTAAGACCTGG      | chr2 | 179415608 | 179416052 |
| TTN_13#2  | CAATCAAGGTCTTCTCATTTCAC     | GGCACTAGATCCATTTACAGTTCC    | chr2 | 179424563 | 179425230 |
| TTN_13#13 | CAAGGTCAAGTTCAGGTGCTTC      | AATCCATTTGTGCTTCTGGAC       | chr2 | 179431076 | 179431715 |
| TTN_13#24 | GTAACAACCTTTCGCGAGGTCAG     | TTGCACTGAATCCTTATGGACC      | chr2 | 179437543 | 179438215 |
| TTN_14#4  | ACCAGGATTTCTCTCTGCATC       | ATTTTAGGAGTGACAAGGCCAG      | chr2 | 179444810 | 179445419 |
| TTN_21#4  | CTCGGACCAATACTTTGCCTTC      | GGAACGTCGAGAAGTAACTGGC      | chr2 | 179454894 | 179455528 |
| TTN_3#5   | TAGACGCAGATGAGGATGATTC      | AAATGGCGTATTCCTAAACTGTCC    | chr2 | 179396839 | 179397490 |
| TTN_7#2   | CAACTGTGACACGCTCTGATTC      | TATGGCATTGGAGAACCTTGTG      | chr2 | 179407515 | 179408147 |
| TTN_10#2  | TGCTGTAACAAGTAATTTCTCCTCC   | AAAGGTGAACAGACGTGGTCC       | chr2 | 179416843 | 179417413 |
| TTN_13#3  | GAAGTAATTTCAAAGACGTGGG      | CCACTGGGCCTATTATAGTTAAAGATG | chr2 | 179425177 | 179425834 |
| TTN_13#14 | ACAGACGGTATGGAGTCTTTG       | AGGATGAGGTTGAACTCCCAAG      | chr2 | 179431641 | 179432305 |
| TTN_13#25 | CCAGCAGACAACCATCGAATC       | GCTATCACTTGCAAGGATGATG      | chr2 | 179438130 | 179438810 |
| TTN_15#1  | TCTTGGAGTTACCAGCTCTACACC    | CTCACCCATCACTGGCTATTTG      | chr2 | 179446106 | 179446844 |
| TTN_21#5  | TGAACCTCAGGTACAGGATAGG      | TGAGCACTACACAGTTGAAACAGAC   | chr2 | 179455461 | 179456086 |
| TTN_3#6   | GGTCGGTAGTAAAAGTCATAATCAGG  | GAGTCACAGCCACTAACACAGC      | chr2 | 179397393 | 179398038 |
| TTN_7#3   | TCGACCACTTCTAGCTTTGCAG      | AAGACCACCTCCTGTCATAACG      | chr2 | 179408062 | 179408751 |
| TTN_10#3  | GGCTAACCTCAATTTACATGTCTTAC  | CACCATTCTCAAGTTACTCGC       | chr2 | 179417353 | 179417936 |
| TTN_13#4  | AACGCTCTCGAACTTGACATCC      | TCAGCTGTTGTTGCAGAGTATCC     | chr2 | 179425761 | 179426429 |
| TTN_13#15 | TCAAGTCTGAATGTTTCTCCAGC     | CTACAAAGAACCAGGCCCTCC       | chr2 | 179432218 | 179432898 |
| TTN_13#26 | GCTTCACCTGCTTTTAATATAACCG   | TGCCAACTATCCATTTAAGGTTCC    | chr2 | 179438722 | 179439402 |
| TTN_16    | TGAATGTCTTCTCCACATTATTC     | GAAGCAGCATATGAATTTCCAC      | chr2 | 179447576 | 179448044 |
| TTN_21#6  | GCCCAGGAACATCAAGAACAG       | TTGGATCCTCTCCGTAAGTTGC      | chr2 | 179455932 | 179456717 |
| TTN_21#7  | CTAGGGAGACTTCAGTCTTGCAAC    | TGAAGATGGTGGAAATTTACTTTAAC  | chr2 | 179456557 | 179457185 |
| TTN_29#4  | TGGTTCATTCCATTTCACTAGCATA   | CCACAAATCATGTCAGAGGAGC      | chr2 | 179473128 | 179473732 |
| TTN_34#1  | TTGTATGGCATCCCAACCTTC       | CACTGCAAACCTCATTAACTTTTCTTC | chr2 | 179481130 | 179481773 |
| TTN_44#1  | GCTGCTTTCATGCAATATAACACTTAG | AGGAACCCAGGAAATCACAGG       | chr2 | 179496767 | 179497407 |
| TTN_54    | GAGCAAAGGAGTCAGGTAAGGG      | CAAAGCTTGGTTTTGATTCTTGG     | chr2 | 179509215 | 179509435 |
| TTN_85#1  | GGAGATGAACAAAAGGATGGG       | GTGATCACAGAATATTTGCCTTTC    | chr2 | 179542272 | 179542740 |
| TTN_109   | CCTTCTTCACCTCCACTG          | CCTGAAAGCATTTTACTTACTACACC  | chr2 | 179563485 | 179563709 |

|             |                             |                             |      |           |           |
|-------------|-----------------------------|-----------------------------|------|-----------|-----------|
| TTN_121#2   | CTACAATTGTTGCAGGCTCTGG      | TTATCACTAGTTTGATTCCCGGC     | chr2 | 179578885 | 179579394 |
| TTN_21#9    | TCATCTCCAACCTTTCTGGTACTCAAC | TGAAAGCCAAAGATCGTTTCAG      | chr2 | 179457672 | 179458315 |
| TTN_30#1    | TGCTGAAGCTATGTCCCATTTTC     | GAGTTGCCACTTTCCCATTTTG      | chr2 | 179473832 | 179474393 |
| TTN_34#2    | GGCCTTGGATAGCCTGTACTTG      | TTTTAGAAACCCAGACTGTGCCTAC   | chr2 | 179481641 | 179482380 |
| TTN_44#2    | AAAAGCAGCTGACTTGATCACC      | GAGGGGTTGCTTGGTTGTGTAG      | chr2 | 179497320 | 179497884 |
| TTN_56      | CCACAGTTGACATGAGAGAAACAG    | TGCATCAATGTGAAATTTGTATGAG   | chr2 | 179511025 | 179511367 |
| TTN_88#1    | CTCACCAAGTTATGCTGCATGG      | AGTGGTGCCAGTGATACCAGTC      | chr2 | 179544001 | 179544646 |
| TTN_110-111 | AGGGCCAATGCGTTGTATTAAG      | TTCTGCCATTAGATATGCCTGAC     | chr2 | 179565760 | 179566430 |
| TTN_122     | GATAAGACTGGGCTGGGGTG        | TCTCTCTGATGGAGTGAAGATTG     | chr2 | 179579626 | 179580077 |
| TTN_23      | TCTCATGATGTAAATGGTCAGC      | CAAAGCTATGCTGTATGCTGTGTAAC  | chr2 | 179461750 | 179462205 |
| TTN_30#2    | GGGGCATCTATAGTGATCATAACC    | TTTTGTTTTAAGAAGGTGGTTTTCC   | chr2 | 179474291 | 179474768 |
| TTN_35#2    | TCAACTCCTCTTTCTGTAGACCAG    | GCATAATAACATGATGTAGCTTGGC   | chr2 | 179483005 | 179483650 |
| TTN_44#3    | TGTTTGGAGTGAGGGTTAGAAGG     | GACAAAACCTGCACTGGAGAAGG     | chr2 | 179497773 | 179498371 |
| TTN_60      | ATGCAACAACAATGAGGACAAC      | ACTTTGGACCCACAGAATTTGG      | chr2 | 179514192 | 179514745 |
| TTN_88#2    | AGTAAGCAATCATTGGTGCTGC      | TGAAGCTCAGAATCCTTTCCAC      | chr2 | 179544515 | 179545232 |
| TTN_112     | CTAGCATCAGCTGAGTGAGACC      | CCCAGACGATGAAGGTGATTTTC     | chr2 | 179566543 | 179567194 |
| TTN_123     | AAGAATCAATCTTCCACTCCATCAG   | CATTTAACTCTTCTTCTTGAAGTGC   | chr2 | 179580048 | 179580645 |
| TTN_24      | TTGTTACACAGCATACAGCATAGC    | GGAAGCCATTAAGCAAGAAGC       | chr2 | 179462178 | 179462853 |
| TTN_30#3    | ACATCTACAGGTGGATCAGGGG      | AGCCCCACTTAGAGACAAGTGC      | chr2 | 179474689 | 179475195 |
| TTN_36#1    | GAAATGAAAGACCCTCACAAAGG     | TTGCAAGCTAACTGATAATCCAATG   | chr2 | 179484246 | 179484874 |
| TTN_44#4    | TCACCATCTTTGAACCATTTCCAC    | AATGGGTCCCTTTTACTCAGGC      | chr2 | 179498286 | 179498899 |
| TTN_61      | TTCTGTGGGTCCAAAGTTTTATG     | CAAAGAAGTCAGTGCAATGAGATAG   | chr2 | 179514729 | 179515164 |
| TTN_89#1    | GGCTAACAGGCTATGGATGTATTTAG  | AAGTGTGAAGAAAGCTGTCCC       | chr2 | 179545599 | 179546180 |
| TTN_113     | TGAGCGCATACAGGGTAGAAATAC    | GCTACATTCGACCAGCATGAATAC    | chr2 | 179567101 | 179567608 |
| TTN_124#1   | CTCTCTCTCAAGCACACCCACC      | GTGTCTTGGTACAAGGATGGGG      | chr2 | 179581738 | 179582430 |
| TTN_25#1    | ACAGAAGTTAATGGGATTGAGAATAAC | AGAGCCAGAATATGATGGAGGC      | chr2 | 179463151 | 179463719 |
| TTN_31#1    | GCACTGCAAAGTAACTAATTTCTC    | GATGCTGGGAGAAAACACATTG      | chr2 | 179475652 | 179476369 |
| TTN_36#2    | ACTCATCATCCAGCCTGCAATC      | GAAGACCTTAGGATTGTTGAGCC     | chr2 | 179484772 | 179485350 |
| TTN_47#1    | TGTAATACTGGGAAACGAGGTCC     | AAGACCTCCACGGCTAAACTTG      | chr2 | 179500607 | 179501155 |
| TTN_72      | AAAGGTGGTCTTTCTATCGCC       | GTGGAACAAAGGGAGGATGGAG      | chr2 | 179529124 | 179529775 |
| TTN_91      | GGAAGTGAAGGCAAAGAGCCAG      | TGTCTTTGTCTTGAATTTGTTG      | chr2 | 179547873 | 179548111 |
| TTN_114#1   | CACAACATTTGCCATTGACC        | CAACTTAAAGACCAGGGCAATTATC   | chr2 | 179568815 | 179569309 |
| TTN_124#2   | ATACTGCCCTATGTGGCTCTGG      | GCCTGATAGAAAATGAGGCTGG      | chr2 | 179582311 | 179583105 |
| TTN_25#3    | CCATCATCTTTAGTGGAAACC       | TCTGCCTACAGTGGATCCAAAC      | chr2 | 179464082 | 179464680 |
| TTN_31#2    | TCCATTTCTCAGTGCCTACTGG      | TATTTTCAGCCACTCCTGGACC      | chr2 | 179476258 | 179476898 |
| TTN_36#4    | TTTTCTGAAAGCAACCGACAAG      | CGGAAGAGAATCCTGGTCATTC      | chr2 | 179485717 | 179486304 |
| TTN_47#2    | TGCAAGTTGCTACTAAGGTTTGTTAC  | TGCTTTACGGCTGTTTTATCC       | chr2 | 179501056 | 179501622 |
| TTN_74      | TTGTTGAGCTTCTACTTGGGG       | CCAAGAAAGTCAAGTCCCACAC      | chr2 | 179531407 | 179531802 |
| TTN_94      | CCACCAACATATAAACAGTATGACCC  | AAAAGTGAATGCTAAGCCCCAC      | chr2 | 179549295 | 179549796 |
| TTN_114#2   | TAGCGCTAGCGATGTGTGGAC       | ACCTAACGACATCCAGAATGG       | chr2 | 179569252 | 179569791 |
| TTN_124#3   | TCAGTCATGCCATGTAAAAGAGG     | GAATGAGCCTCACATTCACCAG      | chr2 | 179582978 | 179583652 |
| TTN_26#2    | CTGGATTGACTTTGGTCCAGG       | GGAATTTGATGAAAAGGCAAAG      | chr2 | 179466130 | 179466762 |
| TTN_31#3    | TCGTTTTGTACATCAACCAC        | TTCTAATATCTGCCTGTGAGCTACG   | chr2 | 179476840 | 179477464 |
| TTN_37      | AAGTAAAGTGGTGACCAGAGAAGTTG  | GGCAGCTTCAAGTGATTTCAAAG     | chr2 | 179487281 | 179487643 |
| TTN_48      | TTCCCTTGAATATGAACTTTGG      | TTTATAATGGAGCATGACTCACCC    | chr2 | 179502023 | 179502241 |
| TTN_77      | TGTGGCATTGAGAAGAGAAAGG      | TGTTTATATCTCTCATGCTCTGCTTG  | chr2 | 179534856 | 179535101 |
| TTN_96      | TGGTAGATGTTCACTGAATTTGTGTC  | CCATGAAGCTATGTCTAAGCAG      | chr2 | 179552714 | 179553069 |
| TTN_117     | AGCCTACAAATTGCAGATGAGC      | TTGTCTTTAGAGAGGAATAAACCCAGG | chr2 | 179572120 | 179572698 |
| TTN_124#4   | GCTGCCTTTAAACCACTTGACC      | GCACGTATCCGTCCATGTTTC       | chr2 | 179583582 | 179584304 |

|            |                             |                             |      |           |           |
|------------|-----------------------------|-----------------------------|------|-----------|-----------|
| TTN_26#3   | TCCATCCTATTAGAAAAGGAGACAG   | AAGACTCCAGCACTTCATCAGC      | chr2 | 179466636 | 179467380 |
| TTN_31#4   | TCATTAAGAAGTAATGTAGCCAGGAGG | AAAATAAACATAGGCTTCTCTGCTTC  | chr2 | 179477377 | 179478069 |
| TTN_40     | GCAGGAGCTAGTTATTTACCAAAGC   | GTTTGATTAACCAGAAGGCAGG      | chr2 | 179493364 | 179493745 |
| TTN_49-50  | GGGCTTGAATTTAATCAAGTGTG     | CGTGGGCTTAATTTTAGTTTTGAC    | chr2 | 179504344 | 179504919 |
| TTN_78     | TTGGTAGAACTTCCCTTGACC       | ATGTGTAATATGAAGGAATGTGTGTG  | chr2 | 179535641 | 179536121 |
| TTN_97     | TGTGGAAGAAGAAGAGACTTTGAGG   | GGTGTACTGTGCAACTCTTCCC      | chr2 | 179553335 | 179553595 |
| TTN_120#1  | GGATTACTTAAGCAGAATTTAAGCC   | CCCATTTCGGTTACCTGGAAG       | chr2 | 179576548 | 179577231 |
| TTN_124#5  | ATGTGGGGAAGGGTAGTTTTGC      | TGATAACATTGCAACCCTCCAG      | chr2 | 179584181 | 179584828 |
| TTN_29#1   | AGACTGTTGGGAGTTTGAAGCC      | GAGCTGATAAAGACCCTGTTG       | chr2 | 179471654 | 179472281 |
| TTN_32#2   | TCTGCAGCAACTCTGAAGATG       | TTGAAAATGTCCTAAGAAATCCAC    | chr2 | 179478841 | 179479321 |
| TTN_41     | GCGGAAAGAGAAAGGCAAAG        | GAACCCCTAAAGACCCTTCCC       | chr2 | 179493903 | 179494675 |
| TTN_51     | GAGTGAGATGGTAAAGAAAATTAAGCC | GGGAGTGAAGATAAGTGGATGG      | chr2 | 179505125 | 179505561 |
| TTN_80     | GAGGGATCCATTGCTATGTGTATAAG  | CACCTCTAGGGTTCCTACTCCAC     | chr2 | 179538078 | 179538596 |
| TTN_99     | GGGTGGACAGACACTTTTGTTTC     | GATTTGTGCATGTGCCTATGTTC     | chr2 | 179554401 | 179554699 |
| TTN_120#2  | TGTCCTGCATCCTCTACTGTGC      | TCCCATGGATGTTTTAACTGGG      | chr2 | 179577107 | 179577674 |
| TTN_124#6  | AATTAGATGCTTCTGGACTCCCC     | TTTCTTGTGTGCAGCATGTATTGTC   | chr2 | 179584782 | 179585513 |
| TTN_29#2   | GCCATGGTCTTTTCGCAGTG        | GGGGAAATTGTTGGCTATTTTG      | chr2 | 179472195 | 179472719 |
| TTN_32#3   | AAGACGTTCACTCCACCACAG       | CTGTGGAATGTACTGCCTGTCTC     | chr2 | 179479195 | 179479895 |
| TTN_42     | TTTGAACCACTTCTGTATTGGAATG   | GTTTCATCACCACTTTATTTGTTGC   | chr2 | 179494801 | 179495205 |
| TTN_52     | AGAAAGCAGACAATGGAACACAG     | TCGGTGTAATGCTTACTTTCCAG     | chr2 | 179505816 | 179506188 |
| TTN_81     | GCTACTGAGAAAGATTTGGAACACC   | TTTACACAAGCGTTTTCGAAGG      | chr2 | 179538978 | 179539242 |
| TTN_106    | TTACGCACAACCTTGAACCTCTGG    | CTGCTTGATCCTGCTTCAAATC      | chr2 | 179559807 | 179560310 |
| TTN_120#3  | TCACTGCTACCTTTGAACCAGC      | AAAAGAGCCAAATGGATCTAGGG     | chr2 | 179577579 | 179578223 |
| TTN_126#1  | TGTTGCCTCCAACACTAATACAC     | ATTAATGGCTCTGCACCCATC       | chr2 | 179586434 | 179587191 |
| TTN_29#3   | CATTTGTGCCAACCAACTGC        | ATGCACCAGATAAGCCCATTTG      | chr2 | 179472671 | 179473195 |
| TTN_33     | TTAAATTTTCCCAACAAAGCC       | CTGCAGTTTGTATCCCTGGTC       | chr2 | 179479959 | 179480608 |
| TTN_43     | TCCTGCATCCACTCTGACTTTC      | TTCCAAGAGATTGTCAATTTCCC     | chr2 | 179495447 | 179496092 |
| TTN_53     | GCGAACCAATTCAAAGAAAACC      | TGCAGCGAAAATTGTTACTTAATG    | chr2 | 179506859 | 179507164 |
| TTN_83     | TGAGTGTCTGTGTGGATAGAACC     | ACAGACCTGTCTTGAGCGACTG      | chr2 | 179540324 | 179540838 |
| TTN_108    | GAGGAGACTCCACAACCTTTCAATAAG | GGAAGGGCTGGTGTATGAGTAG      | chr2 | 179561734 | 179562024 |
| TTN_121#1  | TTGCTGATTCCAGAAGATGTCGG     | CAGATACAAGGCACACTCACC       | chr2 | 179578499 | 179578994 |
| TTN_126#2  | GTGGGTTGGAAGCTGAGCAAG       | TTCTTAGAACCCGCTTATTTTG      | chr2 | 179587025 | 179587672 |
| TTN_126#3  | CTCCAGAGGTTCCAGTTCCG        | AGTGGGGAATACACCTGTGTGG      | chr2 | 179587627 | 179588217 |
| TTN_129#9  | TGGGTGGTTCTGAAGAAGGG        | TTGCCAGCTCAAATTTTATTC       | chr2 | 179597437 | 179598076 |
| TTN_134#4  | GAAATGCTCATTTGGTGTACCG      | AATCACTTCAATGGAGGTGGAAG     | chr2 | 179611683 | 179612325 |
| TTN_136#2  | TCTGCAATTTGTAAAGGGATG       | AAGGAACCAGATACTGCATGGC      | chr2 | 179621275 | 179621770 |
| TTN_147#5  | CAACTTCAACATTTACTTTGCATCTTG | GATTCTGGGGAATGGACTGTG       | chr2 | 179641643 | 179642222 |
| TTN_170    | CTACCCCATGGCTCTGTG          | CTGCAAAGCAGCTCCAGAGT        | chr2 | 179668899 | 179669447 |
| TTN_17b    | TTTTTATTAGGAAAAATGACCATCA   | CAGGGATGATAATGTGAAATATGGA   | chr2 | 179448264 | 179448712 |
| TTN_3#9b   | GCTGGAGAGCCTCCGATG          | CACAAGTGCTTTTGAACCTAATGAAAG | chr2 | 179399134 | 179399627 |
| TTN_126#4  | AAACCTTTCACAAAGAGACGGG      | TCATCACCTATTTCAAGTTGCCTG    | chr2 | 179588141 | 179588778 |
| TTN_130#1  | TTCTTCCATGGGGTAAGAAAGC      | TCATGTGAAGCAGTGAATGACG      | chr2 | 179598987 | 179599494 |
| TTN_134#5  | GTGGACGACCTAGTGATTCCTG      | TTGTCTCTAGAAAATGGAGGC       | chr2 | 179612240 | 179612871 |
| TTN_137    | CAGTATGCAATAAAAACAAACAGCAG  | AAGGACAAGGCAGTAGGAGTGG      | chr2 | 179622171 | 179622775 |
| TTN_148#1  | GCCATTTTAGCCCTCGATTTTC      | TCATAGCTCCTTGCACAGTAAAG     | chr2 | 179643495 | 179643937 |
| TTN_13#32b | ATGGACCTACCGTATTCATCCTT     | TGTATAAATAATTTGGGCAACACA    | chr2 | 179442319 | 179442993 |
| TTN_90b    | TTGGGTATCCAAATTTTATCTTG     | GCAAAAAGAAATAAATCAAAGCACATT | chr2 | 179547323 | 179547722 |
| TTN_163    | AGAAAATCTATTCAAATGCGAGGTG   | TCAAGGTAGGAAGGCAAAGAGTG     | chr2 | 179658624 | 179658861 |
| TTN_126#5  | GTGGTTTGGTACTTTGCTCCAC      | CCATCTCACTGGGAGAAACAATC     | chr2 | 179588708 | 179589360 |

|            |                               |                              |      |           |           |
|------------|-------------------------------|------------------------------|------|-----------|-----------|
| TTN_130#2  | TGAAAGCATTGTGTAAGTAATGGG      | TGTGTGTTGGGTCTCTTTGTTG       | chr2 | 179599345 | 179599813 |
| TTN_134#6  | AAAGGCTTTTCCTCACTTGCTG        | CCTGCAATTTCTAAAAGAGCTGAAC    | chr2 | 179612800 | 179613449 |
| TTN_139    | TTGTGATGGAGGAGAAGCTGAC        | CTACATGCTCCCTTCTGTGAGG       | chr2 | 179628817 | 179629099 |
| TTN_38b    | TCTTTAAACACATAAAGGATCAGGT     | AAAGTTGAGAAGGTACCAAACTCT     | chr2 | 179489030 | 179489529 |
| TTN_175    | TAGAATTAGTAACTAGTCTTGTGAAACC  | CATTGAATATTGTGCTTAAAGAGAGAA  | chr2 | 179674426 | 179674625 |
| TTN_153    | GAAACTGATCTTTGCAAACGTGTAT     | CATGAGCTAAGAGTTTATGAGATTCC   | chr2 | 179648366 | 179648583 |
| TTN_154    | CACCTGGCCCTGCTCAAT            | GGGCTAGCCATCGGAGGAT          | chr2 | 179648740 | 179649136 |
| TTN_127#2  | GATTGTCCAGATCATGCGAGAG        | GTGCTGGACTCTACTTACCCATTAG    | chr2 | 179590412 | 179590896 |
| TTN_131    | AAAGTGTACTGACTGAATTGTTTGCC    | CTTAACTCATCTTTTCTGTCTTGG     | chr2 | 179600146 | 179600893 |
| TTN_134#7  | TGTGTTTTATTGTAGTGTGAAACTGC    | CCAAGCAGAGGGTACTGTTTATCC     | chr2 | 179613371 | 179614008 |
| TTN_140    | CACTGGGAAAGGACAAAAGCC         | GAGTTTTGCATGCTCTCTTGTG       | chr2 | 179629186 | 179629604 |
| TTN_164    | TGAGTTAATGTGCACTGAAGGA        | GGTGGCTCAGTTTTCCAGT          | chr2 | 179659065 | 179659364 |
| TTN_87     | AAAGAGTTGCATCCCAAAGAG         | ATTGCCAGCCTTAAATCTTAGC       | chr2 | 179543376 | 179543625 |
| TTN_100b   | GGCAGCATAGTACATATGAAGATCG     | TGTAATCTTAGATGTCTCAGAAGGTGA  | chr2 | 179556658 | 179556894 |
| TTN_10#1c  | AGCATTCCCTTGATATATTTGTTTCTAA  | ACCTGAAGATAATGGAGGAGGAGA     | chr2 | 179416284 | 179416883 |
| TTN_128#1  | TAATACCCAGGGGAGAAGGTGG        | TTTCTGTCTGACTGTGTCTTTGG      | chr2 | 179591757 | 179592287 |
| TTN_132    | TTTCCCACACATGTACAGAAAGC       | CACCAATTTCAACTGTTTTACTCC     | chr2 | 179602728 | 179603198 |
| TTN_134#8  | CATTTTCCTTTTCTGATCTACCAAG     | AGAGAAGGGGATTCCATCATT        | chr2 | 179613899 | 179614616 |
| TTN_144#2  | TGGACTTTCCTTTCTGAGACCAG       | CAGGACTTCTTTTCTTGTATGATG     | chr2 | 179634882 | 179635466 |
| TTN_128#2b | ACCAAAGACACAGTACAGACAGAA      | AATGTCCATAAACTGTCAACAATAAT   | chr2 | 179592264 | 179592663 |
| TTN_79#1b  | TCTTCCAAACTGAACACAAAATTTAC    | TAGATGCTCTTTCAGGGAGAAGT      | chr2 | 179536612 | 179537009 |
| TTN_141b   | TTACAAGAATTTAGTGACTTAAACAGGA  | GGGAGGAAACCAGAGCTTCAA        | chr2 | 179631029 | 179631404 |
| TTN_102c   | GTATGCACACTGTGACTAAATCTATTATT | TCATTTTCATGTTTGTCTCTGTTTT    | chr2 | 179558225 | 179558524 |
| TTN_129#1  | ACAAAGGCAAGAGTGATACATTTAAG    | ATGACCTTGGAAATGTGTTGTGG      | chr2 | 179592766 | 179593449 |
| TTN_133#1  | AAGTGAAAATTTAAGTGATGCAAGC     | AACAAGTTTGAAGAAGAAATGG       | chr2 | 179603784 | 179604460 |
| TTN_134#9  | CAACTGCCCTGAATTGTTTTTC        | ACATGCCAATCCCACGTAATC        | chr2 | 179614406 | 179615185 |
| TTN_146#2  | CTTCGTCTGAAGCATGAGTTCG        | GAGGGTGACATTGTTTCTGCTTG      | chr2 | 179638246 | 179638790 |
| TTN_166    | AGAGACATGTGCTTTTAAGTTTAC      | GATTTTTGTTGTAGAGTAAGGCAAAC   | chr2 | 179661384 | 179661659 |
| TTN_92b    | GATTAGTTTTAGTGTCTGGATGCTT     | TGTCAAGTGTTTATGTTTGGGCTAC    | chr2 | 179548664 | 179548904 |
| TTN_39b    | TGGCATTGTTTATGAGCCTCT         | AAATGCACCCATATACTAGATTGC     | chr2 | 179489942 | 179490180 |
| TTN_104c   | ATGTTTTGATCTATAGGGACAAAACATGC | ATTAGTAGTTTGCTAACTTCACTATGC  | chr2 | 179558889 | 179559085 |
| TTN_129#2  | TGGGAATATTTGTTTCCCGTC         | TTGCCCTGAAAGGTCAGTTATAC      | chr2 | 179593371 | 179594026 |
| TTN_133#2  | AACTTCTGGTTCAGTAATGGGTTT      | AGAATTGAGGAAGGCAAGTCC        | chr2 | 179604388 | 179604999 |
| TTN_134#10 | TTCCATATTGGTTAAATAGCACACAAG   | AGCCAAGAAGCACTGGTAAAGG       | chr2 | 179615057 | 179615702 |
| TTN_146#3  | CACAATGTGAACCTGTCACTG         | GGGGAGATAAAAGACATAACAAGACATC | chr2 | 179638683 | 179639296 |
| TTN_101b   | GATGCTATTTTGTAAATACACAGATCTTA | ACAACAACATATGCCTTGCAAA       | chr2 | 179557138 | 179557367 |
| TTN_12#3b  | AACTGTTGCAGACACTTCACTCC       | TGACCTTATCAAGAGATGGTGTG      | chr2 | 179422505 | 179422854 |
| TTN_73b    | GAAACCATAGTTTTAAGAGCAGAGGAC   | AAATATCACTTTGTTTCTGCTCATT    | chr2 | 179530037 | 179530270 |
| TTN_115c   | TTCTGGTAATTCAAAGGGAATATGTG    | TTGAATGATGATAGACAATTAATAAAG  | chr2 | 179569822 | 179570156 |
| TTN_129#3  | AATGAATGATGGTGGTCTGTG         | AAGCCAGTCCAGTCTTAGTGC        | chr2 | 179593880 | 179594652 |
| TTN_133#3  | CAGTACCTGCTTTTCTCAAGTGC       | GGGAATTTCTTGCATCAATGG        | chr2 | 179604940 | 179605574 |
| TTN_134#11 | TGTCCTCTGCTTGGGTATTTTC        | GAGGCTTAGTTGAAAGGGGAG        | chr2 | 179615614 | 179616266 |
| TTN_147#1  | TTTTACCACATGCTAAGGGTGAC       | TGGTCATAAGAGATGTGACTGCTG     | chr2 | 179639582 | 179640184 |
| TTN_5#3b   | CAGAGATGTACCTCGACTCTG         | CAGACTTACCATACCAATCAAAGG     | chr2 | 179404227 | 179404626 |
| TTN_129#5b | TTTACTGTCAGATGCCACT           | GCAGCTGCAAGGCTAGAAT          | chr2 | 179595233 | 179595681 |
| TTN_169    | TCCCAATTTGCTGGAGATGT          | GCAGTGAACATGATGGGACAG        | chr2 | 179666803 | 179667147 |
| TTN_119#1c | CACCTTCAGGCTATACTACAAAATGA    | AATCAAATATGAACCTAGGGAGAAAT   | chr2 | 179575298 | 179575744 |
| TTN_129#6  | CAGCTGCTCCTCCCAACATC          | GTTGGTTCCAGTGAGGGACTG        | chr2 | 179595675 | 179596413 |
| TTN_133#4  | AGGTTGGGAGATGGTTCCTTG         | AATTCGCTGTGCTCAAGGGC         | chr2 | 179605511 | 179606122 |

|             |                                |                                |      |           |           |
|-------------|--------------------------------|--------------------------------|------|-----------|-----------|
| TTN_135#1   | AAGTCCATGCCAAACAACTATTG        | CAGGATACCACGTGGACTGAAG         | chr2 | 179618041 | 179618540 |
| TTN_147#2   | GA CTGGAGGTTTCTCCAGCTATG       | TGTTGACACCACTGAAACCAAAG        | chr2 | 179640104 | 179640690 |
| TTN_93b     | GCCCCATAACCAGTGATT             | TCTAAAATCACAGTACTTTCTGGCTAGT   | chr2 | 179548982 | 179549223 |
| TTN_103b    | GACAACAAGAGGGATAAAAATCTGC      | TCTAAATACTTGAGTATAAAAATCCATGTG | chr2 | 179558578 | 179558824 |
| TTN_162b    | GGTAAAGGTGATTATCTGTGTTGACC     | CGAGGCTGGTCTTGAACATAATTT       | chr2 | 179658061 | 179658340 |
| TTN_125c    | CTCATAACTTTGCTAAGAGCCCAA       | ATGGGATCTTCAGCTACAAAAACAA      | chr2 | 179585581 | 179586011 |
| TTN_129#7   | GGGAGCTGGTACTCTCGATCTTC        | GAGAAATTAAGGAGAGCAGCAAAC       | chr2 | 179596269 | 179596951 |
| TTN_134#2   | TTGATAAACCTGGGAGGCC            | TCAAGAAATTTGCTCTGGAAGTTG       | chr2 | 179610574 | 179611206 |
| TTN_135#2   | TTCCACAAGGAATATGCACAGC         | GAATGTCAAACCCCTGGAAGTC         | chr2 | 179618431 | 179618938 |
| TTN_147#3   | TTTCATGGGTAATTCCTTCAGCC        | TGAGAAAAGTCTTGGAAGAATCC        | chr2 | 179640626 | 179641203 |
| TTN_84b     | TTTTCTAAAACCCAGTTTCATCA        | GTTTGTGGTCTTATCCTCAGC          | chr2 | 179541847 | 179542119 |
| TTN_160     | TGATGAAAATGTAGGTGATTTGC        | CATCCTGTATTTCTGAGTGTTC         | chr2 | 179655364 | 179655663 |
| TTN_21#10b  | CATACTGAAACGATCTTTGGCTTT       | CCTGGTTCAAAGATGAAGCTGAT        | chr2 | 179458290 | 179458864 |
| TTN_127#1c  | GCCAGTAACTCTAGTAATTCATTCCA     | CATGATCTGGACAATCTTTTCAAC       | chr2 | 179590028 | 179590427 |
| TTN_129#8   | ACCACTGTCTTCGATGCCAAC          | TCATCTCCCTTAGATCAACCCTC        | chr2 | 179596860 | 179597507 |
| TTN_134#3   | CGGGAAGTGTCACTATTTTCACC        | TCCTACTGGAGGACCAAACCC          | chr2 | 179611124 | 179611770 |
| TTN_136#1   | TTGAATTTGCATGGCAGAAAAG         | CTCAAAGTTCATCCACACAGC          | chr2 | 179620872 | 179621353 |
| TTN_147#4   | TTCTCTGTAAGCCTTTCCTCCC         | TCTGCCTGGTATACTGCGACTG         | chr2 | 179641145 | 179641718 |
| TTN_118b    | GCTCATGGATATAACAGGCAGTG        | AGTTGGTTAGCCTTGATTTTAAAC       | chr2 | 179574228 | 179574697 |
| TTN_143b    | CCCACATTTTATTTATCCATTCATT      | CCTCAACAGACGCACTAAAAACA        | chr2 | 179633304 | 179633769 |
| TTN_155     | AATCCTCCATTGGCCTACCC           | CATCTGCCTGTCCTGATGC            | chr2 | 179650252 | 179650951 |
| TTN_129#10c | AAAATTTGAGCTGGGCAACAT          | AAAACTCTAAATATAGATGGTGTGAAAG   | chr2 | 179598059 | 179598694 |
| TTN_134#12c | CCTTTCAACTAAAGCCTCCACA         | TAAACAGAGCATGGTGTTC            | chr2 | 179616249 | 179616939 |
| TTN_158c    | ATTTACATGATATGTGGTATTAATGT     | GGAAGGGGGAAGGTCATACTA          | chr2 | 179654019 | 179654299 |
| TTN_27c     | AAGGCAGAATTATCCATTTAGTGA       | TACAGTCATCCCTCCCAAATAAGTT      | chr2 | 179468534 | 179469129 |
| TTN_79#2c   | GACAGTTCTCCCTGAAAGAGCAT        | GTAATGTTGGCGTTGTCTCTGG         | chr2 | 179536984 | 179537516 |
| TTN_21#11b  | CATCTTTGAACAGGAAACCTTAG        | GGAATATTCACATACCTACTACATTCTT   | chr2 | 179458850 | 179459449 |
| TTN_3#1b    | TCAAATGTGTGTTTCTGCTTTGG        | ATTTATGGGGCAAGCCTTTAAGA        | chr2 | 179394524 | 179395223 |
| TTN_134#1c  | GAGTCCATTCCTGAAACACTTT         | GGTTTATCAAAGGTATTTCTGACTG      | chr2 | 179609984 | 179610583 |
| TTN_159c    | AGGGATTTTAAAGGCAAATACA         | GCCTCCTTCTTTTGACTIONACG        | chr2 | 179654593 | 179654928 |
| TTN_28#1c   | ATGGCATCAAACAGAGTCATGTA        | ACAGGCCTTCCAATGCCTAAGA         | chr2 | 179469373 | 179469933 |
| TTN_36#5c   | TCCGTCCTTCAGTCAGTATTTTCAT      | TTTCTTAAAGGACACCTGTGTGA        | chr2 | 179486301 | 179486800 |
| TTN_4#1b    | TTAAAAGAATTTATGCAAAGATGG       | AAAGTCCAGCTCAGCAATGTTTT        | chr2 | 179401599 | 179402129 |
| TTN_105c    | TTTTGGTCGTTTCAGATTTGTGAG       | AAGTTGTGCGTAAAGGTCAAAG         | chr2 | 179559220 | 179559819 |
| TTN_138c    | TTGTTACAGACATTGTTAAGATTCGAT    | GTGTTTGCAGGTAAATGTAAAAATCC     | chr2 | 179623645 | 179623970 |
| TTN_161c    | TGCAGCTGGCTGTAATGTGAT          | GAAAAGGGATTTTACATCTTCAA        | chr2 | 179656737 | 179657033 |
| TTN_35#1c   | TTTTATTTAATTGATAGGCCTAATATCTG  | GGTCTACAGAAAGGAGGAGTTGA        | chr2 | 179482436 | 179483027 |
| TTN_107c    | TGCAAATCAGGTTTCATAGCA          | TAGTGAAGCAGTTGGATGGAT          | chr2 | 179560505 | 179561054 |
| TTN_134#13b | TGCATGCTACAGATCTCACAATC        | AAAATAGACAATAACCTAGCTGTCAATC   | chr2 | 179616858 | 179617497 |
| TTN_116c    | GTTGACTGTGGATGCGGAAC           | AGGCTTATTTTACAAAGGGGGATA       | chr2 | 179571110 | 179571759 |
| TTN_145c    | TTTTAAAACGATAACGATCAAGATT      | TACTTCTGCAAAGATTTTCCCATT       | chr2 | 179635874 | 179636270 |
| TTN_165c    | GAGTTTCATGGCAGAAATCCAG         | TTAAAGCACTTCCAGCTTTTCATC       | chr2 | 179659575 | 179660069 |
| TTN_36#3c   | TAAGGTCTTCTCTGTTGTAAAGG        | CTTGTCGGTTGCTTTCAGA            | chr2 | 179485341 | 179485738 |
| TTN_146#1c  | AGGAATTTTGGGGAAATGAATA         | AGACGAAGGACCTTACAAGCTG         | chr2 | 179637754 | 179638253 |
| TTN_98b     | AGAATTTAACACACTCGAAGATTTT      | TGTCCACCCGTCTGCTTTC            | chr2 | 179553710 | 179554409 |
| TTN_167#1c  | ATGATACATGATCACCTTCTAAAATACTTC | CCCTCCTCCCGTGAAGTTTC           | chr2 | 179663135 | 179663832 |
| TTN_148#c   | ACTGTGGCAAGGAGCTATGAT          | TCTCCAGCTAAAAACTTCAAC          | chr2 | 179643918 | 179644293 |
| TTN_167#3c  | CCTTCTCGTTTCAAACCTAGTTCC       | TCTTTTAAATGGGTCTTGTGTC         | chr2 | 179664150 | 179664694 |
| TTN_45c     | TTAGAACTTGGCGTCTATCTT          | AAATTTGTATCTGAAACACTTCTCCT     | chr2 | 179499013 | 179499651 |



|             |                                |                               |       |           |           |
|-------------|--------------------------------|-------------------------------|-------|-----------|-----------|
| TTN_129#4c  | GACTGGACTGGGCTTCTTAAT          | GGTTGGCAAATTTTATTTCCACTTA     | chr2  | 179594638 | 179595232 |
| TTN_89#2b   | GACAGCTTTCTTCAGCACTTCAAA       | CCTACTTCAATAGGCTATGGCTATACT   | chr2  | 179546161 | 179546592 |
| TTN_46b     | TAGATCCTGAATATTGGATGTGGT       | TCCTGAAATTTACTAAGGAAGCTATGTA  | chr2  | 179499827 | 179500520 |
| TTN_149c    | CCGAGCTCATCACTTGAA             | TTATCAACTTTCCCCAGTGTAGAG      | chr2  | 179644635 | 179645031 |
| TTN_168c    | TGGCCCCATTTAGACACAAAC          | TTTAAAAATACCTTGTAGGGAGCAC     | chr2  | 179665057 | 179665474 |
| TTN_55c     | TCATTTTCAGATGGCTGGATAGA        | TGTTTTATGTTGGATACTGGTATTACG   | chr2  | 179510581 | 179510928 |
| TTN_134#14c | AGCTAGGTTATTGTCTATTTTCAATGTAAT | AAAAATGTTTTAAATCTTTCTGTCAAC   | chr2  | 179617477 | 179618113 |
| TTN_32#1b   | TCCCAAGGAATACTAAAGAGTAAACA     | AGTTGCTGCAGAAAACATGTATGG      | chr2  | 179478404 | 179478852 |
| TTN_95b     | AGACAGTTATGCAAATGTGAAGGTATTATT | AGGGGTTTGGCAAGGGTTA           | chr2  | 179549902 | 179550446 |
| TTN_15#2c   | TGAGCCCCATCATCTGC              | GGTCTCCAGACCTCTACTATACTCAT    | chr2  | 179446841 | 179447388 |
| TTN_171c    | AACCAGCTTAAATTGATCTTACATTCC    | TTCACTTAATTTCTAAAGTTGAGGTC    | chr2  | 179671302 | 179671696 |
| TTN_59c     | TTTCTGTGCAATATGGTTTTAACATAAAT  | TGCTGCTCCAATAAATACAGGTTT      | chr2  | 179513858 | 179514147 |
| TTN_142e    | GGTTAGAAAATGTAAGGGAAACATT      | TGAATTATATCTCAATAAAGCTGTTAAAA | chr2  | 179632393 | 179632941 |
| TTN_21#8b   | TCATGGGCAGCATTACGAA            | ATGAAGAGTGGAGAAGAGCCAATC      | chr2  | 179457183 | 179457675 |
| TTN_62-63   | GGAAGGAAGAAGAACAAGCTTAAAT      | TCCAATTCCTCTGCTGTATATTTTG     | chr2  | 179515402 | 179518121 |
| TTN_150c    | CAGCAAACGGCAGCACT              | TCACAGATAAGTCCAATTTTACCC      | chr2  | 179645773 | 179646068 |
| TTN_172c    | TCCAGAGCCAGAGATCAATAA          | CAACACAGTTATTTTAAATACAGTTCTA  | chr2  | 179671876 | 179672375 |
| TTN_82c     | AATATGTTGATTTCTGGGGTAAA        | TCATCTGTGTATGTGCCTTG          | chr2  | 179539659 | 179539958 |
| TTN_152c    | GCACAGAAACCATATTGTGGAAAAG      | GCATAAGTTCAAACCTACATTTGTT     | chr2  | 179647451 | 179647881 |
| TTN_6b      | CAAAAAGGTGAATTTTCCACATA        | CCAACCAAACCTAAGGAAAACAC       | chr2  | 179405941 | 179406402 |
| TTN_67-69   | CCAGAGCACAAGAGATAGATCA         | TGATGTGCTGCTGGAAAA            | chr2  | 179522175 | 179524056 |
| TTN_151c    | CTACTCTAGGCTTCATGCACGTAT       | TCAGTGCTAAGCAGGGGTCCT         | chr2  | 179646873 | 179647391 |
| TTN_173c    | CACTTGTGGCAGTCATACAAAA         | TGGATTCTGGAGAATGTAGGTAG       | chr2  | 179672451 | 179672681 |
| TTN_85#2c   | ATGAAGAAGCTTATGAAAGGCAAAT      | TTTCATATCTATTGCTCTAAGACATTTT  | chr2  | 179542703 | 179543002 |
| TTN_26#1c   | TGTGAACTATTATTGAACACCTAGGAAG   | AAGCCTGGACCAAAGTCAA           | chr2  | 179465509 | 179466153 |
| TTN_8#9b    | GAGCACAACCGTCATTGAGTG          | TGGCCTTGTGATATGGCACTAC        | chr2  | 179414498 | 179415092 |
| TTN_71      | CCAGAGCAGAAGAGATACATCA         | TGGGTGGGGCGATAGAAA            | chr2  | 179528304 | 179529152 |
| TTN_156c    | TGATTCCTAAGGGTAAGATTGT         | TTGTTTCATTCTTTGCTTAACTCTCC    | chr2  | 179651422 | 179651624 |
| TTN_174c    | ATGCTTAAATCATCCATAAGGTCC       | ACAAGACAATTTTCTCCCTCTAAG      | chr2  | 179672888 | 179673125 |
| TTN_86c     | TGTAATGGGGAAATTTGTATGTGAG      | CTTAATCTTTTGAACCTATGCTTGG     | chr2  | 179543061 | 179543301 |
| TTN_22c     | GAATGAAATGTACGGCATTATACACA     | TCAAACAACATTTTGTCTCCTTT       | chr2  | 179460134 | 179460633 |
| TTN_8#4b    | GCTTCGCTGGCCTTGCTA             | GCGCACTCAAATTAAGTCACTCAT      | chr2  | 179411762 | 179412261 |
| TTN_147#6c  | TCCCGAATCACTGGGTGT             | TGTTTTGCTGAGTTTTCTTTATGCC     | chr2  | 179642212 | 179642759 |
| TTN_157c    | GGAGGATGGACTGAATCTAACCA        | AAAATCTGCTGAACCAGCCACA        | chr2  | 179652753 | 179652997 |
| TTN_25#2c   | CTGGCTCTCCAGTTGACAG            | TGATGGTGGGTCTAAGATTACAAAC     | chr2  | 179463712 | 179464087 |
| TTN_76c     | AAAAGACAAACATAGTGAATTTAAGGA    | TCATCTGTAGATGCCCTTC           | chr2  | 179534030 | 179534491 |
| TTN_119#2c  | ATTTCTCCCTAAGTTTATATTTGATT     | ATTGCATATATACGTGCGTTTG        | chr2  | 179575719 | 179576167 |
| TTN_3#12b   | TAGCTCTGACTTGGTAAACTGTGG       | CCAATTTTCACTTTCTGGAATAGC      | chr2  | 179400757 | 179401435 |
| MYBPC3_8    | GGGCTGGGGATGATTTG              | GGGACACTAGCCAGATTGG           | chr11 | 47369117  | 47369331  |
| MYL2_2      | CACCCAGAGTAGGGGCCTGACCTA       | TTCAGGCCGAATTTGGGATTGTTT      | chr12 | 111356770 | 111357073 |
| MYH7_12     | GGGAGTCTCAGAACCCACAG           | TGAGCAGACATGGCCCTCC           | chr14 | 23898925  | 23899240  |
| GLA_2       | GTGAAATCCCAAGGTGCCTA           | AGAAGTGCTTACAGTCTCTGAA        | chrX  | 100658747 | 100659058 |
| LAMP2_4     | GGGTAGGGCAGGCAGAGA             | CAGATAATGACTTCAATGAAAGCTA     | chrX  | 119582741 | 119583087 |
| G6PDe11     | TAGTCCACCTCACCCCG              | GTGGCCTTTGCCCTCCT             | chrX  | 153760338 | 153760557 |
| G6PDe10     | GGTCCAGCTCCGACTCCT             | GGTGCCCTTATCCTGCG             | chrX  | 153760804 | 153761016 |
| SRYc        | TGGCTGTAGCGGTCCCGT             | TCGTGGAAGGCGAAGAT             | chrY  | 2655045   | 2655252   |
| SRYb        | ATCTGGACGTTGCCTTTACTG          | AAATAAGTTTGAACCTCTGGCACCT     | chrY  | 2655470   | 2655702   |

\* Positions correspond to hg19. MYBPC3, MYL2, MYH7, GLA, LAMP, G6PD, and SRY

primers were used as controls for CNV analyses.

**Supplementary Appendix Table 2:** Genomic library adaptor oligonucleotides

| <b>Name</b>       | <b>Sequence</b>                             |
|-------------------|---------------------------------------------|
| Solexa_PE_Fh_AACT | ACACTCTTTCCCTACACGACGCTCTCCGATCTAAC*T       |
| Solexa_5'AACT     | /5Phos/GTTAGATCGGAAGAGCGGTTCAGCAGGAATGCCGAG |
| Solexa_PE_Fh_AGGT | ACACTCTTTCCCTACACGACGCTCTCCGATCTAGG*T       |
| Solexa_5'AGGT     | /5Phos/CCTAGATCGGAAGAGCGGTTCAGCAGGAATGCCGAG |
| Solexa_PE_Fh_ATGT | ACACTCTTTCCCTACACGACGCTCTCCGATCTATG*T       |
| Solexa_5'ATGT     | /5Phos/CATAGATCGGAAGAGCGGTTCAGCAGGAATGCCGAG |
| Solexa_PE_Fh_CACT | ACACTCTTTCCCTACACGACGCTCTCCGATCTCAC*T       |
| Solexa_5'CACT     | /5Phos/GTGAGATCGGAAGAGCGGTTCAGCAGGAATGCCGAG |
| Solexa_PE_Fh_CGAT | ACACTCTTTCCCTACACGACGCTCTCCGATCTCGA*T       |
| Solexa_5'CGAT     | /5Phos/TCGAGATCGGAAGAGCGGTTCAGCAGGAATGCCGAG |
| Solexa_PE_Fh_GGAT | ACACTCTTTCCCTACACGACGCTCTCCGATCTGGA*T       |
| Solexa_5'GGAT     | /5Phos/TCCAGATCGGAAGAGCGGTTCAGCAGGAATGCCGAG |
| Solexa_PE_Fh_GTCT | ACACTCTTTCCCTACACGACGCTCTCCGATCTGTC*T       |
| Solexa_5'GTCT     | /5Phos/GACAGATCGGAAGAGCGGTTCAGCAGGAATGCCGAG |
| Solexa_PE_Fh_TCGT | ACACTCTTTCCCTACACGACGCTCTCCGATCTTCG*T       |
| Solexa_5'TCGT     | /5Phos/CGAAGATCGGAAGAGCGGTTCAGCAGGAATGCCGAG |
| Solexa_PE_Fh_TGAT | ACACTCTTTCCCTACACGACGCTCTCCGATCTTGA*T       |
| Solexa_5'TGAT     | /5Phos/TCAAGATCGGAAGAGCGGTTCAGCAGGAATGCCGAG |
| Solexa_PE_Fh_TTCT | ACACTCTTTCCCTACACGACGCTCTCCGATCTTTC*T       |
| Solexa_5'TTCT     | /5Phos/GAAAGATCGGAAGAGCGGTTCAGCAGGAATGCCGAG |
| Solexa_PE_5'ACGT  | /5Phos/CGTAGATCGGAAGAGCGGTTCAGCAGGAATGCCGAG |
| Solexa_Fh_ACGT    | ACACTCTTTCCCTACACGACGCTCTCCGATCTACG*T       |

|                  |                                              |
|------------------|----------------------------------------------|
| Solexa_PE_5'AGCT | /5Phos/GCTAGATCGGAAGAGCGGTTTCAGCAGGAATGCCGAG |
| Solexa_Fh_AGCT   | ACACTCTTTCCCTACACGACGCTCTTCCGATCTAGC*T       |
| Solexa_PE_5'TGGT | /5Phos/CCAAGATCGGAAGAGCGGTTTCAGCAGGAATGCCGAG |
| Solexa_Fh_TGGT   | ACACTCTTTCCCTACACGACGCTCTTCCGATCTTGG*T       |
| Solexa_PE_5'TCCT | /5Phos/GGAAGATCGGAAGAGCGGTTTCAGCAGGAATGCCGAG |
| Solexa_Fh_TCCT   | ACACTCTTTCCCTACACGACGCTCTTCCGATCTTCC*T       |
| Solexa_PE_5'GACT | /5Phos/GTCAGATCGGAAGAGCGGTTTCAGCAGGAATGCCGAG |
| Solexa_Fh_GACT   | ACACTCTTTCCCTACACGACGCTCTTCCGATCTGAC*T       |
| Solexa_PE_5'CGTT | /5Phos/ACGAGATCGGAAGAGCGGTTTCAGCAGGAATGCCGAG |
| Solexa_Fh_CGTT   | ACACTCTTTCCCTACACGACGCTCTTCCGATCTCGT*T       |
| Solexa_PE_5'GTGT | /5Phos/CACAGATCGGAAGAGCGGTTTCAGCAGGAATGCCGAG |
| Solexa_Fh_GTGT   | ACACTCTTTCCCTACACGACGCTCTTCCGATCTGTG*T       |
| Solexa_PE_5'CTCT | /5Phos/GAGAGATCGGAAGAGCGGTTTCAGCAGGAATGCCGAG |
| Solexa_Fh_CTCT   | ACACTCTTTCCCTACACGACGCTCTTCCGATCTCTC*T       |
| Solexa_PE_5'CAGT | /5Phos/CTGAGATCGGAAGAGCGGTTTCAGCAGGAATGCCGAG |
| Solexa_Fh_CAGT   | ACACTCTTTCCCTACACGACGCTCTTCCGATCTCAG*T       |
| Solexa_PE_5'GCAT | /5Phos/TGCAGATCGGAAGAGCGGTTTCAGCAGGAATGCCGAG |
| Solexa_Fh_GCAT   | ACACTCTTTCCCTACACGACGCTCTTCCGATCTGCA*T       |

\* = phosphorothioate linkage; /5Phos/ = 5' phosphate

**Supplementary Appendix Table 3: Summary of cohort characteristics\***

|                                          | DCM       |           |           | HCM      | Control  |
|------------------------------------------|-----------|-----------|-----------|----------|----------|
|                                          | Group A   | Group B   | Group C   |          |          |
| Subjects, no.                            | 92        | 71        | 149       | 231      | 249      |
| Women, no. (%)                           | 28 (30)   | 16 (23)   | 60 (40)   | NA       | NA       |
| Age, yr*                                 | 37.2±14.0 | 40.6±12.7 | 39.4±12.5 | NA       | NA       |
| LVEF (%)*                                | 29.4±12.2 | 24.8±11.5 | 31.2±11.5 | NA       | NA       |
| Sequencing Methodology <sup>^</sup>      | Next-gen  | Next-gen  | Dideoxy   | Next-gen | Next-gen |
| Mutation Positive, no.(%)                | 37 (40)   | 17 (24)   | 13 (9)    | 3        | 7        |
| Family History, no.(%)                   |           |           |           | NA       | NA       |
| Yes                                      | 78 (89)   | 9 (21)    | 102 (68)  |          |          |
| No                                       | 10 (11)   | 30 (70)   | 47 (32)   |          |          |
| NA                                       | 4         | 29        | 0         |          |          |
| Mutation Positive Family History, no.(%) |           |           |           | NA       | NA       |
| Yes                                      | 33 (88)   | 3 (21)    | 11 (85)   |          |          |
| No                                       | 3 (12)    | 11 (79)   | 2 (15)    |          |          |
| NA                                       | 1         | 3         |           |          |          |

No., number; \* Values are means ±SD. <sup>^</sup>Sequencing methods were Next-gen, filter-based hybridization capture of TTN and next-generation sequencing or Dideoxy, conventional Sanger dideoxy sequencing. Age and left ventricular ejection fraction (LVEF) are taken at the time of initial diagnosis of DCM. Percent of subjects with family history excludes subjects in whom family history was not available. Across all DCM groups, TTN truncating mutations were found in 25% of subjects with and 18% of subjects without a family history of DCM (P=0.3).

**Supplementary Appendix Table 4: Sequencing data for *TTN* truncating mutations**

| Chr position | Ref base           | Var base | Nucleotide change                 | Quality  | Filter                           | Allele balance | # Reads      |              |       | Subject | Cohort  |
|--------------|--------------------|----------|-----------------------------------|----------|----------------------------------|----------------|--------------|--------------|-------|---------|---------|
|              |                    |          |                                   |          |                                  |                | Major allele | Minor allele | Total |         |         |
| 179659280    | TA                 | T        | c.1246-3delT                      | 23585.55 | PASS                             | 0.14           | 1146         | 6989         | 8135  | pv-75   | Control |
| 179647331    | T                  | A        | c.3101-2A>T                       | 7728.48  | FDRtranche10.0<br>0to50.00+      | 0.58           | 348          | 250          | 598   | N-50    | Control |
| 179604949    | CT                 | C        | c.12059delA                       | 10405.56 | PASS                             | 0.43           | 1155         | 1551         | 2706  | pv-1    | Control |
| 179604264    | G                  | A        | c.12745C>T                        | 1962.07  | PASS                             | 0.57           | 136          | 103          | 239   | HFA-42  | DCM-A   |
| 179591957    | TC                 | T        | c.19183delG                       | 2609.57  | PASS                             | 0.54           | 120          | 104          | 224   | HFA-9   | DCM-A   |
| 179583071    | ACAGATATCT<br>TGAC | A        | c.23798_23810delGTCAAGA<br>TATCTG | 1797.98  | PASS;StrandBias                  | 0.22           | 124          | 451          | 575   | PA-1    | HCM     |
| 179558736    | C                  | T        | c.30476-1G>A                      | 2380.12  | FDRtranche10.0<br>0to50.00+;PASS | 0.58           | 155          | 113          | 268   | D13KD-1 | DCM-A   |
| 179535816    | C                  | A        | c.34186+1G>T                      | 833.79   | PASS                             | 0.49           | 38           | 39           | 77    | SS-333  | HCM     |
| 179516991    | C                  | A        | c.34690G>T                        | 1122.33  | PASS                             | 0.10           | 109          | 955          | 1064  | 12s-C11 | Control |
| 179506963    | C                  | T        | c.35635+1G>A                      | 7327.23  | PASS                             | 0.54           | 65           | 55           | 120   | HFA-26  | DCM-A   |
| 179506963    | C                  | T        | c.35635+1G>A                      | 7327.23  | PASS                             | 0.55           | 263          | 217          | 480   | HFA-41  | DCM-A   |
| 179506964    | C                  | G        | c.35635G>C                        | 6450.31  | PASS                             | 0.43           | 55           | 75           | 131   | UK-B12  | DCM-B   |
| 179498055    | T                  | C        | c.38024-2A>G                      | 1440.31  | FDRtranche10.0<br>0to50.00+      | 0.58           | 288          | 207          | 495   | MIY-11  | DCM-A   |
| 179497076    | T                  | TA       | c.38621_38622insA                 | 2339.05  | PASS                             | 0.20           | 145          | 595          | 740   | MDT-11  | DCM-A   |
| 179485012    | G                  | T        | c.41313C>A                        | 12126.6  | PASS                             | 0.52           | 421          | 383          | 804   | UK-H11  | DCM-B   |
| 179478864    | CT                 | C        | c.44336delA                       | 4754.46  | PASS                             | 0.56           | 240          | 187          | 427   | HFA-68  | DCM-A   |
| 179477885    | TA                 | T        | c.44725+2delT                     | 5928.55  | PASS                             | 0.48           | 90           | 98           | 188   | MDD-22  | DCM-A   |
| 179477885    | TA                 | T        | c.44725+2delT                     | 5928.55  | PASS                             | 0.48           | 90           | 98           | 188   | MIV-14  | DCM-A   |
| 179477004    | TA                 | T        | c.45322delT                       | 4088.96  | PASS                             | 0.52           | 178          | 166          | 344   | UK-G1   | DCM-B   |
| 179472127    | C                  | A        | c.48364+1G>T                      | 3132.58  | FDRtranche10.0<br>0to50.00+;PASS | 0.57           | 215          | 159          | 374   | HFA-71  | DCM-A   |
| 179471841    | C                  | A        | c.48565G>T                        | 17194.16 | PASS                             | 0.48           | 479          | 516          | 995   | UK-A3   | DCM-B   |
| 179467006    | T                  | C        | c.50197+3A>G                      | 4964.76  | PASS                             | 0.55           | 226          | 183          | 409   | 12s-G11 | Control |
| 179458075    | AG                 | A        | c.53935delC                       | 4133.57  | PASS                             | 0.51           | 179          | 172          | 351   | HFA-63  | DCM-A   |
| 179457392    | A                  | T        | c.54422-5T>A                      | 6168.22  | PASS                             | 0.54           | 215          | 186          | 401   | UK-B1   | DCM-B   |
| 179457005    | C                  | T        | c.54704-1G>A                      | 1273.14  | PASS                             | 0.49           | 56           | 59           | 115   | UK-B12  | DCM-B   |
| 179456704    | C                  | T        | c.55003+1G>A                      | 7835.09  | PASS                             | 0.53           | 310          | 276          | 586   | MGR-11  | DCM-A   |
| 179455162    | A                  | T        | c.56367T>A                        | 5790.41  | PASS                             | 0.58           | 228          | 167          | 395   | MEH-11  | DCM-A   |
| 179454957    | G                  | A        | c.56572C>T                        | 8250.03  | PASS                             | 0.52           | 269          | 253          | 522   | MDJ-21  | DCM-A   |
| 179454576    | G                  | A        | c.56953G>A                        | 5819.28  | PASS                             | 0.52           | 197          | 184          | 381   | MEW-11  | DCM-A   |
| 179452435    | G                  | A        | c.58678C>T                        | 3233.06  | PASS                             | 0.58           | 198          | 146          | 344   | MAO-92  | DCM-A   |
| 179447207    | TG                 | T        | c.60147delC                       | 1144.41  | StrandBias                       | 0.23           | 165          | 552          | 717   | SS-201  | HCM     |

|           |        |                   |                              |          |                                  |      |     |     |      |          |         |
|-----------|--------|-------------------|------------------------------|----------|----------------------------------|------|-----|-----|------|----------|---------|
| 179444661 | C      | T                 | c.62425+5G>A                 | 9756.67  | FDRtranche10.0<br>0to50.00+;PASS | 0.24 | 8   | 25  | 33   | MAM-12   | DCM-A   |
| 179444429 | G      | A                 | c.62572C>T                   | 18928.38 | PASS                             | 0.57 | 572 | 428 | 1000 | UK-A10   | DCM-B   |
| 179443339 | T      | C                 | c.63405A>G                   | 1427.03  | PASS                             | 0.55 | 224 | 187 | 411  | MIS-11   | DCM-A   |
| 179442324 | C      | G                 | c.63901+5G>C                 | 7488.06  | FDRtranche10.0<br>0to50.00+      | 0.55 | 343 | 286 | 629  | MCL-15   | DCM-A   |
| 179441649 | C      | T                 | c.64489+1G>A                 | 6822.3   | PASS                             | 0.52 | 255 | 234 | 489  | UK-B2    | DCM-B   |
| 179441015 | CT     | C                 | c.64920delA                  | 5378.99  | PASS                             | 0.66 | 395 | 201 | 596  | UK-H2    | DCM-B   |
| 179440067 | CT     | C                 | c.65867delA                  | 2395.82  | PASS                             | 0.13 | 117 | 798 | 915  | UK-C8    | DCM-B   |
| 179438874 | ATATGC | A                 | c.67057_67063delGCATATGinsTA | 4467.51  | PASS                             | 0.23 | 165 | 559 | 724  | MHG-23   | DCM-A   |
| 179434160 | CAA    | C                 | c.71774_71775delTT           | 7059.09  | PASS                             | 0.54 | 306 | 262 | 568  | A-15     | Control |
| 179433758 | G      | GT                | c.72178_72179insT            | 4981.24  | PASS                             | 0.55 | 244 | 197 | 441  | HFA-57   | DCM-A   |
| 179433213 | G      | GGTTTATCTAT<br>CT | c.72723_72739delinsAGA       | 945.03   | PASS                             | 0.33 | 125 | 254 | 379  | SS287-15 | DCM-A   |
| 179428871 | G      | A                 | c.77065C>T                   | 21554.16 | FDRtranche10.0<br>0to50.00+;PASS | 0.61 | 188 | 119 | 307  | MID-1    | DCM-A   |
| 179428871 | G      | A                 | c.77065C>T                   | 21554.16 | FDRtranche10.0<br>0to50.00+;PASS | 0.61 | 188 | 119 | 307  | SS725    | DCM-A   |
| 179425091 | G      | A                 | c.80845C>T                   | 1841.18  | PASS                             | 0.14 | 127 | 784 | 911  | MGW-11   | DCM-A   |
| 179424496 | C      | T                 | c.81440G>A                   | 1670.2   | PASS                             | 0.14 | 148 | 898 | 1046 | MIP-13   | DCM-A   |
| 179424398 | CAG    | C                 | c.81536_81537delCT           | 6212.74  | StrandBias                       | 0.57 | 283 | 214 | 497  | UK-C6    | DCM-B   |
| 179424036 | A      | T                 | c.81898+2T>A                 | 10097.32 | PASS                             | 0.47 | 266 | 300 | 566  | MIA-1    | DCM-A   |
| 179422457 | G      | T                 | c.82701C>A                   | 2923.47  | PASS                             | 0.59 | 219 | 153 | 372  | UK-B6    | DCM-B   |
| 179417723 | ATAAT  | A                 | c.84977_84980delATTA         | 8795.62  | PASS                             | 0.62 | 230 | 142 | 372  | UK-E12   | DCM-B   |
| 179413187 | G      | A                 | c.88242C>T                   | 2808.37  | PASS                             | 0.54 | 150 | 126 | 276  | UK-C10   | DCM-B   |
| 179412902 | C      | A                 | c.88528G>T                   | 1639     | FDRtranche10.0<br>0to50.00+;PASS | 0.53 | 87  | 76  | 163  | MBG-121  | DCM-A   |
| 179412245 | CTTTAA | C                 | c.89180_89184delAAATT        | 10083.39 | PASS                             | 0.54 | 140 | 117 | 257  | HFA-46   | DCM-A   |
| 179410799 | G      | A                 | c.90241C>T                   | 1584.39  | PASS                             | 0.12 | 107 | 782 | 889  | MHQ-12   | DCM-A   |
| 179410544 | T      | TGGG              | c.90493+2insCCT              | 41982.72 | PASS                             | 0.58 | 862 | 621 | 1483 | SS723    | DCM-A   |
| 179408239 | G      | GT                | c.91537_91538insA            | 3613     | PASS                             | 0.62 | 220 | 136 | 356  | UK-E4    | DCM-B   |
| 179406990 | C      | G                 | c.92569+1G>C                 | 8827.13  | FDRtranche10.0<br>0to50.00+;PASS | 0.51 | 180 | 173 | 353  | HFA-83   | DCM-A   |
| 179406990 | C      | G                 | c.92569+1G>C                 | 8827.13  | FDRtranche10.0<br>0to50.00+;PASS | 0.51 | 289 | 274 | 563  | HFA-66   | DCM-A   |
| 179404491 | CCT    | C                 | c.93376_93377delAG           | 12491.23 | PASS                             | 0.61 | 562 | 361 | 923  | UK-G7    | DCM-B   |
| 179404286 | G      | A                 | c.93583C>T                   | 8470.72  | PASS                             | 0.55 | 364 | 299 | 663  | UK-G9    | DCM-B   |
| 179403522 | T      | A                 | c.94111A>T                   | 7746.65  | PASS                             | 0.50 | 250 | 250 | 500  | MHX-11   | DCM-A   |
| 179402067 | A      | G                 | c.94942+2T>C                 | 7331.01  | PASS                             | 0.50 | 269 | 265 | 534  | pv-35    | Control |
| 179401029 | G      | T                 | c.95522C>A                   | 2296.56  | PASS                             | 0.58 | 158 | 115 | 273  | UK-C9    | DCM-B   |

**Supplementary Appendix Table 5.** Numbers of *TTN* missense variants\* and truncating mutations in cohorts.

| <b>Cohort</b> |         | <b>Cohort size (no.)</b> | <b>Missense variants</b> | <b>Avg. / subject<sup>^</sup></b> | <b>Truncating mutations</b> | <b>Avg. / subject<sup>^</sup></b> |
|---------------|---------|--------------------------|--------------------------|-----------------------------------|-----------------------------|-----------------------------------|
| DCM           | Group A | 92                       | 117                      | 1.27                              | 37                          | 0.40                              |
|               | Group B | 71                       | 103                      | 1.45                              | 17                          | 0.24                              |
|               | Group C | 149                      | 136                      | 0.91                              | 13                          | 0.087                             |
| HCM           |         | 231                      | 263                      | 1.14                              | 3                           | 0.013                             |
| Control       |         | 249                      | 332                      | 1.33                              | 7                           | 0.027                             |

\*Missense variants and truncating mutations with a minor allele frequency less than 0.01.

<sup>^</sup>Average number of missense variants or truncating mutations per subject.

**Supplementary Appendix Table 6: *TTN* nonsense and frameshift mutations\***

| <b>Chr 2<br/>Position</b> | <b>Nucleotide</b>             | <b>Amino Acid</b> | <b>Pedigree</b> | <b>ID</b>     | <b>Diagnosis</b> |
|---------------------------|-------------------------------|-------------------|-----------------|---------------|------------------|
| 179640342                 | c.6247delG                    | p.Arg2083fs       | TSSDC011        | 450           | DCM              |
| 179604949                 | c.12059delA                   | p.Lys4020fs       | pv              | 1             | Control          |
| 179604264                 | c.12745C>T                    | p.Gln4249X        | HFA             | 42            | DCM              |
| 179591957                 | c.19183delG                   | p.Ser6395fs       | HFA             | 9             | DCM              |
| 179583071                 | c.23798_23810delGTCAAGATATCTG | p.Gly7933fs       | PA              | 1             | HCM              |
| 179497076                 | c.38621_38622insA             | p.Ala12873fs      | MDT             | 11            | DCM              |
| 179485012                 | c.41313C>A                    | p.Cys13771X       | UK              | H11           | DCM              |
| 179478864                 | c.44336delA                   | p.Glu14779fs      | HFA             | 68            | DCM              |
| 179477004                 | c.45322delT                   | p.Phe15108fs      | UK              | G1            | DCM              |
| 179471841                 | c.48565G>T                    | p.Gly16189X       | UK              | A3            | DCM              |
| 179469903                 | c.49077G>A                    | p.Trp16359X       | DNFDC144        | 05-0444       | DCM              |
| 179463630                 | c.51883G>A                    | p.Arg17295X       | DNFDC116        | 04-1545       | DCM              |
| 179462477                 | c.52408C>T                    | p.Arg17470X       | TSFDC050        | 115           | DCM              |
| 179459153                 | c.53145_53146insG             | p.Glu17715fs      | TSFDC017        | 253-2         | DCM              |
| 179458849                 | c.53347G>T                    | p.Glu17783X       | DNFDC103        | 03-0941       | DCM              |
| 179458075                 | c.53935delC                   | p.Glu17978fs      | HFA             | 63            | DCM              |
| 179455162                 | c.56367T>A                    | p.Cys18789X       | MEH             | 11            | DCM              |
| 179454957                 | c.56572C>T                    | p.Arg18858X       | MDJ             | 21            | DCM              |
| 179454575                 | c.56953C>T                    | p.Arg18985X       | DNFDC142<br>MEW | 05-0569<br>11 | DCM<br>DCM       |
| 179452435                 | c.58678C>T                    | p.Arg19560X       | MAO             | 92            | DCM              |
| 179449211                 | c.60147delC                   | p.Pro20049fs      | SS              | 201           | HCM              |



|           |                              |              |                |           |            |
|-----------|------------------------------|--------------|----------------|-----------|------------|
| 179444429 | c.62572C>T                   | p.Arg20858X  | UK             | A10       | DCM        |
| 179441015 | c.64925delT                  | p.Lys21640fs | UK             | H2        | DCM        |
| 179440067 | c.65867delA                  | p.Glu21956fs | UK             | C8        | DCM        |
| 179438874 | c.67057_67063delGCATATGinsTA | p.Ala22353fs | MHG            | 23        | DCM        |
| 17943819  | c.67745delT                  | p.Pro22582fs | MEK            | 111       | DCM        |
| 179434160 | c.71774_71775delTT           | p.L23925fs   | A              | 015       | Control    |
| 179433758 | c.72178_72179insT            | p.Gln24059fs | HFA            | 57        | DCM        |
| 179433213 | c.72723_72739delinsAGA       | p.Ser24241fs | SS             | 287-15    | DCM        |
| 179428871 | c.77065C>T                   | p.Gln25689X  | MID<br>SS      | 1<br>725  | DCM<br>DCM |
| 179426039 | c.79896G>A                   | p.Trp26632X  | DNFDC088       | 02-1900   | DCM        |
| 179425091 | c.80845C>T                   | p.Arg26949X  | MGW            | 11        | DCM        |
| 179424889 | c.81046A>T                   | p.Lys27016X  | DNFDC081       | 02-1564   | DCM        |
| 179424496 | c.81440G>A                   | p.Trp27147X  | MIP            | 13        | DCM        |
| 179424398 | c.81536_81537delCT           | p.Ser27179fs | UK             | C6        | DCM        |
| 179422457 | c.82701C>A                   | p.Tyr27567X  | UK             | B6        | DCM        |
| 179417723 | c.84977_84980delATTA         | p.Tyr28326fs | UK             | E12       | DCM        |
| 179413476 | c.87953G>A                   | p.Trp29318X  | TSSDC019       | 268       | DCM        |
| 179413187 | c.88242C>T                   | p.Arg29415X  | UK<br>TSFDC002 | C10<br>23 | DCM<br>DCM |
| 179412902 | c.88528G>T                   | p.Glu29510X  | MBG            | 121       | DCM        |
| 179412245 | c.89180_89184delTTAAA        | p.Thr29725fs | HFA            | 46        | DCM        |
| 179410799 | c.90241C>T                   | p.Gln30081X  | MHQ            | 12        | DCM        |
| 179408989 | c.91043delA                  | p.Asn30348fs | TSFDC033       | 434       | DCM        |
| 179408239 | c.91537_91538insA            | p.Thr30513fs | UK             | E4        | DCM        |
| 179404491 | c.93376_93377delAG           | p.Arg31126fs | UK             | G7        | DCM        |

|           |            |             |     |    |     |
|-----------|------------|-------------|-----|----|-----|
| 179404286 | c.93583C>T | p.Arg31195X | UK  | G9 | DCM |
| 179403522 | c.94111A>T | p.Lys31371X | MHX | 11 | DCM |
| 179401029 | c.95522C>A | p.Ser31841X | UK  | C9 | DCM |

---

\*Mutations are annotated using Human Genome Variation Society guidelines:

<http://www.hgvs.org/mutnomen/>.

**Supplementary Appendix Table 7: *TTN* splicing mutations**

| Chr 2<br>Position | Nucleotide      | Position in<br>splice site |    | Splicing<br>score<br>change | Amino Acid    | Pedigree   | ID       | Diagnosis  |
|-------------------|-----------------|----------------------------|----|-----------------------------|---------------|------------|----------|------------|
|                   |                 | 5'                         | 3' |                             |               |            |          |            |
| 179659280         | c.1246-3delT    | -                          | -3 | -2.2                        | p.Val416      | pv         | 75       | Control    |
| 179647331         | c.3101-2A>T     | -                          | -2 | -8.37                       | p.Val1034     | N          | 050      | Control    |
| 179558736         | c.30476-1G>A    | -                          | -1 | -8.75                       | p.Gly10159    | D13KD      | 1        | DCM        |
| 179535816         | c.34186+1G>T    | +1                         | -  | -8.5                        | p.Val11396    | SS         | 333      | HCM        |
| 179516991         | c.34690G>T      | +1                         | -  | -11.03                      | p.Val11564Phe | 12s        | C11      | Control    |
| 179506964         | c.35635G>C      | -1                         | -  | -14.19                      | p.Val11879    | UK         | B12      | DCM        |
| 179506779         | c.35635+1G>A    | +1                         | -  | -8.18                       | p.Val11879    | HFA<br>HFA | 26<br>41 | DCM<br>DCM |
| 179498055         | c.38024-2A>G    | -                          | -2 | -7.95                       | p.Ala12675    | MIY        | 11       | DCM        |
| 179477885         | c.44725+2delT   | +2                         | -  | -12.92                      | p.Asp14909    | MDD<br>MIV | 22<br>14 | DCM<br>DCM |
| 179472127         | c.48364+1G>T    | +1                         | -  | -8.5                        | p.Asp16122    | HFA        | 71       | DCM        |
| 179467006         | c.50197+3A>G    | +3                         | -  | -5.04                       | p.Glu16733    | 12s        | G11      | Control    |
| 179466858         | c.50346+3A>G    | +3                         | -  | -3.42                       | p.Lys16782    | TSFDC023   | 300      | DCM        |
| 179457392         | c.54422-5T>A    | -                          | -5 | -2.34                       | p.Glu18141    | UK         | B1       | DCM        |
| 179457005         | c.54704-1G>A    | -                          | -1 | -8.75                       | p.Asp18235    | UK         | B12      | DCM        |
| 179456704         | c.55003+1G>A    | +1                         | -  | -8.18                       | p.His18335    | MGR        | 11       | DCM        |
| 179444661         | c.62425+5G>A    | +5                         | -  | -12.17                      | p.Gln20809    | MAM        | 12       | DCM        |
| 179443339         | c.63405A>G      | -2                         | -  | -2.67                       | p.Thr21135    | MIS        | 11       | DCM        |
| 179442324         | c.63901+5G>C    | +5                         | -  | -5.38                       | p.Tyr21301    | MCL        | 15       | DCM        |
| 179441649         | c.64489+1G>A    | +1                         | -  | -8.18                       | p.Gly21497    | UK         | B2       | DCM        |
| 179424036         | c.81898+2T>A    | +2                         | -  | -8.18                       | p.Glu27300    | MIA        | 1        | DCM        |
| 179410544         | c.90493+2insCCT | +2                         | -  | -32.13                      | p.Thr30165    | SS         | 723      | DCM        |
| 179406779         | c.92569+1G>C    | +1                         | -  | -8.27                       | p.Arg30857    | HFA<br>HFA | 66<br>83 | DCM<br>DCM |

\*Mutations are annotated using Human Genome Variation Society guidelines:

<http://www.hgvs.org/mutnomen/>. Amino acid indicated is the residue juxtaposed to the aberrant splice signal.

### Supplementary Appendix Table 8: CNV validation primers

| <b>Name</b>  | <b>Sequence</b>              |
|--------------|------------------------------|
| TTN_37_intF1 | TGAGGAGCTGTAAGAGAATGTCATCAGA |
| TTN_i21_R1   | AGTGCTGGCATTACCACTCCTAGTT    |

**Supplementary Appendix Table 9: Clinical characteristics of DCM Group A probands**

| Subject  | Sex | BSA (m2) | Current age (yr) or death <sup>†</sup> | Age of Dx (yr) | Family Hx | LVEF (%)‡ | FS (%)‡ | LVEDD (mm)‡ | NYHA class¶ | Age at VAD, Tx, Death (yr) <sup>^</sup> | Comments                     | Gene | Mutation(s)*            |
|----------|-----|----------|----------------------------------------|----------------|-----------|-----------|---------|-------------|-------------|-----------------------------------------|------------------------------|------|-------------------------|
| HFA-42   | M   | 1.84     | 66                                     | 54             | No        | 47.5      | 27.9    | 61          | 4           |                                         | CHF, Embolic CVA, ICD        | TTN  | p.Gln4249X              |
| HFA-9    | M   | 1.89     | 55                                     | 42             | Yes       | 15        | 15.5    | 84          | 3           |                                         | CHF, ICD(50) NSVT            | TTN  | p.Ser6394fs             |
| D13KD-1  | F   | 1.99     | 51                                     | 39             | Yes       | 15        | 24.3    | 70          | 4           |                                         | NI Cors                      | TTN  | p.Gly10159              |
| MIY-11   | M   | 2.14     | 42                                     | 41             | Yes       | 20        | 15.8    | 65          | 3           |                                         |                              | TTN  | p.Ala12675              |
| HFA-26   | F   | 1.56     | 51                                     | 45             | No        | 40        | 29.2    | 48          | 2           |                                         |                              | TTN  | p.Val11879              |
| HFA-41   | M   | 2.14     | 60                                     | 57             | No        | 45        | 24      | 58          | 1           |                                         | Episodic severe dyspnea      | TTN  | p.Val11879              |
| MDT-11   | F   | 1.66     | 30                                     | 19             | Yes       | 20        | 11      | 52          | 3           |                                         | ICD(28)                      | TTN  | p.Ala12873fs            |
| MEQ-132  | M   | 1.6      | 25                                     | 22             | Yes       | 45        | 19.3    | 57          | 1           |                                         | Familial Screening           | TTN  | p.Pro13298_Thr17642dup  |
| HFA-68   | F   | 1.83     | 40                                     | 37             | Yes       | 45        | 21.4    | 56          | 1           |                                         | CHF, ICD(38) NSVT            | TTN  | p.Glu14779fs            |
| MDD-22   | F   | 1.88     | 73                                     | 57             | Yes       | 20        | 18      | 58          | 2           |                                         | ICD(70)                      | TTN  | p.Asp14909              |
| MIV-14   | M   | 1.9      | 50                                     | 26             | Yes       | 20        | 9.5     | 63          | 3           | 49                                      | AF, CHF (35), ICD(47)        | TTN  | p.Asp14909              |
| HFA-71   | M   | 2.05     | 61                                     | 40             | Yes       | 15        | 11.3    | 80          | 4           |                                         | CHF,ICD(56), NSVT            | TTN  | p.Asp16122              |
| HFA-63   | M   | 2.25     | 32                                     | 29             | Yes       | 15        | 15.9    | 63          | 4           |                                         | CHF, ICD, NSVT               | TTN  | p.Glu17978fs            |
| MGR-11   | F   | 1.58     | 59                                     | 53             | Yes       | 20        | 9.7     | 62          | 2.5         |                                         | CHF(53)                      | TTN  | p.His18335              |
| MEH-11   | M   | 2.36     | 28 <sup>†</sup>                        | 25             | Yes       | 11        | NA      | NA          | 4           | 28                                      | CHF, NSVT                    | TTN  | p.Cys18789X             |
| MDJ-21   | M   | 2.13     | 35                                     | NA             | NA        | 40        | 21      | 64          | 3           |                                         | ICD, NSVT                    | TTN  | p.Arg18858X             |
| MEW-11   | M   | 1.97     | 37 <sup>†</sup>                        | 20             | Yes       | 25        | NA      | 50          | 4           | 31, 37                                  |                              | TTN  | p.Arg18985X             |
| MAO-92   | F   | 1.6      | 36                                     | 17             | Yes       | 37.5      | 22.4    | 63          | 2           |                                         | ICD(33)                      | TTN  | p.Trp976Arg/p.Arg19560X |
| MAM-12   | M   | 1.79     | 23                                     | 23             | Yes       | 32.5      | 25      | 68          | 4           | 23                                      | ICD, NSVT, SMD               | TTN  | p.Gln20809*             |
| MIS-11   | F   | 1.8      | 62                                     | 59             | Yes       | 20        | 25.5    | 61          | 2           |                                         | AF, CHF                      | TTN  | p.Thr21135              |
| MCL-15   | F   | 1.53     | 54                                     | 24             | Yes       | 28        | 18      | 51          | 3           |                                         | ICD(35)                      | TTN  | p.Tyr21301              |
| MHG-23   | M   | 1.98     | 52                                     | 31             | Yes       | 29        | 14.3    | 77          | 4           | 52                                      | AF, CHF, ICD(46)             | TTN  | p.Ala22353fs            |
| MEK-111  | M   | 1.94     | 24 <sup>†</sup>                        | 15             | Yes       | NA        | 17      | 77          | 4           | 15,24                                   | CHF                          | TTN  | p.Pro22582fs            |
| HFA-57   | F   | 1.98     | 55                                     | 48             | Yes       | 22.5      | 13.7    | 51          | 2           | 55                                      | AF, CHF, NI Cors             | TTN  | p.Gln24059fs            |
| SS287-15 | F   | 1.97     | 54                                     | 45             | Yes       | 45        | 36      | 55          | 1           |                                         | Familial Screening; RVD, SVT | TTN  | p.Ser24241fs            |
| MID-1    | M   | 1.83     | 40                                     | 37             | Yes       | 34        | 15.7    | 51          | 2           |                                         | Familial Screening           | TTN  | p.Gln25689X             |
| SS725    | M   | 2.28     | 62                                     | 51             | Yes       | 20        | 9.5     | 63          | 4           |                                         | CHF, ICD(61)                 | TTN  | p.Gln25689X             |
| MGW-11   | M   | NA       | 40 <sup>†</sup>                        | 35             | Yes       | 12.5      | 13.3    | 98          | 4           | 40                                      | CHF, ICD                     | TTN  | p.Arg26949X             |
| MIP-13   | M   | 2.33     | 41                                     | 33             | Yes       | 30        | 16.5    | 51          | 2           |                                         | CHF, ICD(33) NSVT; NI Cors   | TTN  | p.Trp27147X             |
| MIA-1    | M   | 2.35     | 30                                     | 14             | Yes       | 32.5      | 25      | 68          | 2           |                                         | ICD, NSVT                    | TTN  | p.Glu27300              |

|                 |   |      |                 |    |     |      |      |      |     |       |                                                                |     |              |
|-----------------|---|------|-----------------|----|-----|------|------|------|-----|-------|----------------------------------------------------------------|-----|--------------|
| <b>MBG-121</b>  | M | 2.21 | 34              | 35 | Yes | 20   | NA   | NA   | 3   |       | CHF, ICD                                                       | TTN | p.Glu29510X  |
| <b>HFA-46</b>   | M | 1.9  | 66              | 53 | Yes | 20   | 57   | 62   | 3   |       | AF, AI, ICD                                                    | TTN | p.Thr29725fs |
| <b>MHQ-12</b>   | M | 2.07 | 42              | 38 | Yes | 17.5 | 9.7  | 72   | 1   |       | CHF, ICD(41)                                                   | TTN | p.Gln30081X  |
| <b>SS723</b>    | M | NA   | 56              | 51 | Yes | 15   | 38   | 67   | 3   |       | AF, ICD(52)                                                    | TTN | p.Thr30165   |
| <b>HFA-83</b>   | M | 1.98 | 45              | 40 | Yes | 20   | 15.2 | 66   | 4   |       | AF, CHF, ICD                                                   | TTN | p.Arg30857   |
| <b>HFA-66</b>   | M | 2.04 | 29              | 28 | Yes | 22.5 | 13   | 77   | 3   | 29,32 | ICD(29), NSVT                                                  | TTN | p.Arg30857   |
| <b>MHX-11</b>   | M | 2.24 | 58 <sup>†</sup> | 52 | Yes | 32.5 | 8.2  | 61   | 3.5 | 58    | CHF                                                            | TTN | p.Lys31371X  |
| <b>HFA-10</b>   | M |      | 64              | 57 | NA  | 15   | 5.9  | 84   | 2   | 64    | ICD(58)                                                        |     |              |
| <b>HFA-30</b>   | M |      | 62              | 55 | No  | 25   | 22.6 | 62   | 2   | 60    | IC(54) NSVT                                                    |     |              |
| <b>HFA-37</b>   | M |      | 38              | 18 | No  | 35   | 22.6 | 53   | 1   |       | NSVT                                                           |     |              |
| <b>HFA-43</b>   | M |      | 47              | 37 | No  | 45   | 22.2 | 54   | 1   |       |                                                                |     |              |
| <b>HFA-50</b>   | M |      | 51              | 47 | No  | 20   | 16.7 | 60   | 3   |       | ICD(49)                                                        |     |              |
| <b>HFA-51</b>   | M |      | 43              | 33 | No  | 30   | 18.3 | 71   | 2   |       | ICD                                                            |     |              |
| <b>HFA-53</b>   | F |      | 51              | 47 | Yes | 55   | 25   | 44   | 1   |       | Familial Screening; Abn LV wall motion; NI Cors; NSVT; ICD(47) |     |              |
| <b>HFA-56</b>   | M |      | 37              | 33 | Yes | 35   | 20.4 | 54   | 1   |       |                                                                |     |              |
| <b>HFA-61</b>   | F |      | 63              | 47 | Yes | 37.5 | 8.8  | 57   | 4   |       | ICD(62)                                                        |     |              |
| <b>HFA-67</b>   | M |      | 49              | 43 | NA  | 15   | 14.5 | 69   | 4   | 45    | CAD, ICD(41)                                                   |     |              |
| <b>HFA-70</b>   | F |      | 74              | 58 | Yes | 25   | 12.7 | 71   | 3   |       | AF, ICD, NSVT                                                  |     |              |
| <b>JG-32</b>    | F |      | 51              | 43 | Yes | 45   | 38   | 60   | 3   |       | ICD(45) SM, NI Cors                                            |     |              |
| <b>MAB-17</b>   | F |      | 31              | 22 | Yes | 27   | 21.2 | 66   | 3   | 33    | ICD(33)                                                        |     |              |
| <b>MAE-3111</b> | M |      | 35              | 34 | Yes | 25   | 57   | 15.8 | 3   | 58    | AF, ICD(35), NSVT                                              |     |              |
| <b>MAG-3</b>    | F |      | 69              | 50 | Yes | 35   | 18   | 56   | 3   |       |                                                                |     |              |
| <b>MAK-13</b>   | M |      | 38              | 61 | Yes | 40   | 22   | 70   | 3   |       | ICD(39)                                                        |     |              |
| <b>MBS-1</b>    | M |      | 65              | 65 | Yes | 42.5 | 30.8 | 65   | 1   |       | AF                                                             |     |              |
| <b>MCH-123</b>  | M |      | 12              | 12 | Yes | 30   | 15.4 | 65   | 1   | 13    | ICD(12)                                                        |     |              |
| <b>MDK-11</b>   | M |      | 53              | NA | Yes | 52   | NA   | NA   | NA  |       |                                                                |     |              |
| <b>MDU-111</b>  | F |      | 43              | 31 | Yes | NA   | NA   | NA   | NA  |       |                                                                |     |              |
| <b>MDX-11</b>   | F |      | 40              | 37 | Yes | 40   | 36   | 61   | 1   |       | Family Screening                                               |     |              |
| <b>MEE-11</b>   | M |      | 44              | 32 | Yes | 40   | 22.6 | 62   | 2   |       | ICD(34) VT                                                     |     |              |
| <b>MEI-112</b>  | M |      | 27              | 17 | Yes | NA   | NA   | NA   | NA  |       |                                                                |     |              |
| <b>MEM-11</b>   | M |      | 18              | 10 | Yes | NA   | NA   | NA   | 4   | 12    | CHF                                                            |     |              |
| <b>MEN-111</b>  | M |      | 31              | 12 | Yes | 42.5 | 22.6 | 62   | 1   |       | AF,ICD, NSVT                                                   |     |              |
| <b>MEP-111</b>  | M |      | 46              | 23 | Yes | 45   | 22   | 61   | NA  |       |                                                                |     |              |
| <b>MER-11</b>   | M |      | 54              | 38 | Yes | 18   | NA   | 60   | 3   |       | ICD(38)                                                        |     |              |
| <b>MEX-1</b>    | M |      | 53              | NA | Yes | 9    | NA   | 70   | NA  |       | VT, CAD                                                        |     |              |
| <b>MGL-11</b>   | F |      | 27              | 25 | Yes | 30   | 16.1 | 62   | 2   | 27    | SMD                                                            |     |              |
| <b>MGM-1</b>    | F |      | 73              | 36 | Yes | 30   | 14   | 50   | 2   |       | AF, ICD, NSVT                                                  |     |              |
| <b>MGP-1</b>    | M |      | 58              | 57 | Yes | 44   | 29.7 | 64   | 2   |       | ICD(58)                                                        |     |              |

|                |   |  |                 |    |     |      |      |    |    |    |                                                                     |  |  |
|----------------|---|--|-----------------|----|-----|------|------|----|----|----|---------------------------------------------------------------------|--|--|
| <b>MGS-111</b> | M |  | 30              | 25 | No  | 50   | NA   | 59 | 1  |    | NI Cors; Syncope                                                    |  |  |
| <b>MGU-111</b> | M |  | 41              | NA | Yes | NA   | NA   | NA | NA | 32 |                                                                     |  |  |
| <b>MGY-123</b> | M |  | 35              | 34 | Yes | 15   | 12.3 | 65 | NA |    |                                                                     |  |  |
| <b>MHA-145</b> | F |  | 37              | 34 | Yes | 40   | 31.5 | 54 | 3  | 34 | ICD(34) NSVT                                                        |  |  |
| <b>MHE-113</b> | M |  | 54              | NA | Yes | 22.5 | 12.5 | 64 | 4  | 54 | ICD, AVB                                                            |  |  |
| <b>MHF-11</b>  | F |  | 43              | 40 | Yes | 15   | 8.9  | 56 | 1  |    | AF, ICD(41)                                                         |  |  |
| <b>MHI-11</b>  | M |  | 70 <sup>†</sup> | 56 | Yes | NA   | NA   | NA | 3  | 70 | AF                                                                  |  |  |
| <b>MIF-14</b>  | M |  | 42              | 42 | Yes | 35   | 30.6 | 62 | 2  |    |                                                                     |  |  |
| <b>MIJ-1</b>   | M |  | 49              | 29 | Yes | 15   | 5.2  | 77 | 4  | 47 | ICD(40) NSVT                                                        |  |  |
| <b>MIK-111</b> | F |  | 38              | NA | Yes | 40   | 27.6 | 58 | 1  | 37 | SCD; ICD(37)                                                        |  |  |
| <b>MIM-11</b>  | F |  | 49              | 33 | Yes | 20   | 13.2 | 68 | 4  | 46 | ICD(45)                                                             |  |  |
| <b>MIO-13</b>  | M |  | 28              | 25 | Yes | 30   | NA   | 55 | 2  |    | Familial Screening                                                  |  |  |
| <b>MJ-11</b>   | M |  | 26              | 17 | Yes | NA   | NA   | 69 | 4  | 26 | WPW, RVF                                                            |  |  |
| <b>MT13</b>    | M |  | 48              | 18 | Yes | 30   | 31   | 56 | 1  |    | Familial Screening;<br>AVB; SVT; LV biopsy,<br>myocarditis negative |  |  |
| <b>MW-11</b>   | M |  | 61              | 43 | Yes | 20   | 12.5 | 64 | 2  |    | ICD(56)                                                             |  |  |
| <b>MYC-11</b>  | M |  | 53              | 43 | Yes | 15   | 9.9  | 71 | 1  |    | AF, ICD(50)                                                         |  |  |
| <b>SS126</b>   | M |  | 38              | 28 | Yes | 38   | 18.8 | 64 | 1  |    | ICD                                                                 |  |  |
| <b>SS705</b>   | F |  | 42              | 33 | Yes | 15   | 5    | 59 | 4  | 41 | MR                                                                  |  |  |
| <b>SS719</b>   | F |  | 60              | 45 | Yes | 20   | 6.3  | 64 | 4  |    | CHF; NI Cors                                                        |  |  |
| <b>SS720</b>   | M |  | 67              | 52 | NA  | 25   | 10.3 | 68 | 2  |    | ICD(66), NSVT                                                       |  |  |
| <b>SS731</b>   | M |  | 65              | 65 | No  | 25   | 16.6 | 66 | 3  |    | AF, MR, NI Cors                                                     |  |  |
| <b>MHM-22</b>  | M |  | 29              | 19 | Yes | 40   | 28.8 | 59 | 1  |    |                                                                     |  |  |
| <b>HFA-65</b>  | F |  | 54              | 51 | Yes | 42.5 | 14.8 | 54 | 1  |    | ICD(50)                                                             |  |  |
| <b>MHO-4</b>   | M |  | 60              | 54 | Yes | 20   | 13.6 | 66 | 1  |    | ICD(54), NSVT, mild<br>CAD                                          |  |  |

BSA, body surface area (m<sup>2</sup>) is provided for subjects with TTN mutations; Age of Dx, age of diagnosis; Family Hx,

Familial history of DCM.

‡ Echocardiographic measurements of left ventricular ejection fraction (EF), fractional shortening (FS) and left-ventricular end-diastolic diameter (LVEDD) obtained at time of diagnosis. NA, not available.

¶ New York Heart Association classifications (NYHA) range from 1 to 4.

^ Earliest ages at which subject received a ventricular assist device (VAD) or a cardiac transplant (Tx), or age at death.

|| Clinical data are denoted by: Abn LV wall motion, abnormal left ventricular wall motion identified by echocardiography; AF, atrial fibrillation; AI, aortic insufficiency; AVB, atrio-ventricular block; CHF, hospitalized for congestive heart failure; CVA, cerebral vascular accident; Familial screening, clinical evaluations were prompted by overt DCM in a first-degree relative; ICD, implanted cardiac defibrillator implanted at age (parentheses); MR, mitral regurgitation; PCM, pacemaker; NII, normal coronary artery anatomy defined by cardiac angiography; NSVT, non-sustained ventricular tachycardia; WPW, Wolf Parkinson White; RVD, right ventricular dilation; RVF, right ventricular heart failure, SMD, skeletal muscle disease.

※ TTN mutations are detailed in Supplementary Tables 6 and 7. \* denotes homozygous mutation.



**Supplementary Appendix Table 10: Clinical characteristics of DCM Group B probands**

| Subject | Sex | BSA (m2) | Current age (yr) or death <sup>†</sup> | Age of Dx (yr) | Family Hx | LVEF (%)‡ | LVEDD (mm)‡ | NYHA Class¶ | Age at VAD, Tx, Death (yr)^ | Comments        | Gene | Mutation(s)*             |
|---------|-----|----------|----------------------------------------|----------------|-----------|-----------|-------------|-------------|-----------------------------|-----------------|------|--------------------------|
| UK-H11  | F   | 1.74     | 40                                     | 32             | No        | 20        | 68          | 3           | 32                          |                 | TTN  | p.Cys13771X              |
| UK-G1   | M   | 1.9      | 49 <sup>†</sup>                        | 46             | NA        | 35        | 74          | 4           | 49                          |                 | TTN  | p.Phe15108fs             |
| UK-A3   | M   | 1.67     | 30                                     | 18             | No        | 24        | 79          | 2           | 19                          |                 | TTN  | p.Gly16189X              |
| UK-B1   | M   | 2.1      | 71                                     | 50             | No        | 50        | 55          | 4           | 60                          | RVF<br>RVEF=14% | TTN  | p.Glu18141               |
| UK-B12  | M   | 1.78     | 39                                     | 30             | No        | 6         | 81          | 4           | 31                          |                 | TTN  | p.Val11879<br>p.Asp18235 |
| UK-A10  | M   | 1.88     | 55 <sup>†</sup>                        | 49             | No        | 29        | 64          | 4           | 55                          |                 | TTN  | p.Arg20858X              |
| UK-B2   | M   | NA       | 42 <sup>†</sup>                        | 37             | No        | 23        | 70          | 4           | 42                          |                 | TTN  | p.Gly21497               |
| UK-H2   | M   | 2.09     | 51                                     | 39             | Yes       | 18        | 80          | 3           | 41                          |                 | TTN  | p.Lys21640fs             |
| UK-C8   | M   | NA       | 55 <sup>†</sup>                        | 37             | NA        | 11        | 76          | 4           | 55                          |                 | TTN  | p.Glu21956fs             |
| UK-C6   | M   | 1.83     | 41                                     | 31             | No        | 29        | 67          | 3           | 31                          |                 | TTN  | p.Ser27179fs             |
| UK-B6   | M   | 2.19     | 38 <sup>†</sup>                        | 30             | NA        | 38        | 82          | 4           | 38                          |                 | TTN  | p.Tyr27567X              |
| UK-E12  | M   | 1.8      | 57                                     | 49             | No        | 21        | 78          | 4           | 51                          | ICD             | TTN  | p.Tyr28326fs             |
| UK-C10  | M   | NA       | 38                                     | 29             | No        | 34        | 73          | 4           | 30                          |                 | TTN  | p.Arg29415X              |
| UK-E4   | M   | NA       | 42                                     | 32             | No        | 18        | 61          | 4           | 32                          |                 | TTN  | p.Thr30513fs             |
| UK-G7   | F   | 1.78     | 63                                     | 53             | Yes       | 14        | 59          | 3           | 54                          |                 | TTN  | p.Arg31126fs             |
| UK-G9   | M   | 2.2      | 50 <sup>†</sup>                        | 43             | No        | 17        | 70          | 3           | 50                          |                 | TTN  | p.Arg31195X              |
| UK-C9   | M   | NA       | 62                                     | 49             | Yes       | 32        | 66          | 4           | 54                          |                 | TTN  | p.Ser31841X              |
| UK-A2   | M   |          | 60                                     | 49             | NA        | 44        | 69          | 3           | 49                          |                 |      |                          |
| UK-A4   | M   |          | 40                                     | 29             | No        | 15        | 87          | 3           | 29                          | AVR             |      |                          |
| UK-A5   | M   |          | 40                                     | 30             | No        | 16        | 72          | 3           | 31                          |                 |      |                          |
| UK-A7   | M   |          | 26                                     | 17             | NA        | NA        | NA          | 3           | 17                          |                 |      |                          |
| UK-A8   | M   |          | 50                                     | 40             | No        | 17        | 81          | 3           | 45                          |                 |      |                          |
| UK-A9   | M   |          | 69                                     | 48             | No        | 20        | 69          | 3           | 60                          |                 |      |                          |
| UK-A12  | M   |          | 58                                     | 48             | NA        | 18        | 78          | 2           |                             |                 |      |                          |
| UK-B3   | M   |          | 44 <sup>†</sup>                        | 32             | NA        | 33        | 72          | 4           | 44                          |                 |      |                          |
| UK-B7   | M   |          | 52 <sup>†</sup>                        | 41             | NA        | 19        | 80          | 4           | 52                          |                 |      |                          |
| UK-B8   | M   |          | 63                                     | 50             | NA        | 8         | 90          | 3           | 54                          | AF              |      |                          |
| UK-B9   | F   |          | 50 <sup>†</sup>                        | 49             | NA        | 26        | 66          | 4           | 50                          | ICD             |      |                          |
| UK-B10  | M   |          | 67                                     | 53             | NA        | 18        | 57          | 3           | 59                          | PCM             |      |                          |

|               |   |  |                 |    |     |    |    |   |       |         |     |  |
|---------------|---|--|-----------------|----|-----|----|----|---|-------|---------|-----|--|
| <b>UK-B11</b> | F |  | 57              | 51 | Yes | 34 | 62 | 3 | 52    | PCM     |     |  |
| <b>UK-C1</b>  | F |  | 64              | 51 | Yes | 31 | 61 | 3 | 53    |         |     |  |
| <b>UK-C3</b>  | M |  | 46              | 29 | NA  | 27 | 79 | 3 | 35    |         |     |  |
| <b>UK-C4</b>  | F |  | 66              | 55 | NA  | 32 | 69 | 2 |       |         |     |  |
| <b>UK-C5</b>  | M |  | 57              | 46 | NA  | 24 | 66 | 3 | 47    |         |     |  |
| <b>UK-C7</b>  | M |  | 60              | 43 | NA  | 32 | 78 | 4 | 59    |         |     |  |
| <b>UK-C12</b> | F |  | 28 <sup>†</sup> | 28 | NA  | 15 | 64 | 3 | 28    |         |     |  |
| <b>UK-D1</b>  | M |  | 62              | 46 | No  | 37 | 78 | 3 | 51    |         |     |  |
| <b>UK-D3</b>  | F |  | 44              | 33 | Yes | 44 | 69 | 3 | 34    |         |     |  |
| <b>UK-D4</b>  | M |  | 47              | 36 | No  | 35 | 63 | 3 |       |         |     |  |
| <b>UK-D6</b>  | M |  | 59 <sup>†</sup> | 57 | NA  | 44 | 75 | 4 | 59    | AF      |     |  |
| <b>UK-D8</b>  | M |  | 43 <sup>†</sup> | 38 | NA  | 9  | 98 | 4 | 43    |         |     |  |
| <b>UK-D9</b>  | M |  | 32              | 13 | NA  | 20 | 54 | 3 | 23    |         | TTN |  |
| <b>UK-D10</b> | M |  | 28              | 18 | No  | 5  | 59 | 3 | 20    |         |     |  |
| <b>UK-D11</b> | F |  | 65              | 54 | NA  | 6  | 74 | 3 | 57    |         |     |  |
| <b>UK-D12</b> | M |  | 44 <sup>†</sup> | 39 | Yes | 12 | 76 | 3 | 39,44 |         |     |  |
| <b>UK-E3</b>  | F |  | 43              | 27 | No  | 20 | 71 | 3 | 32    |         |     |  |
| <b>UK-E6</b>  | M |  | 69              | 58 | NA  | 11 | 74 | 3 | 59    | PCM     |     |  |
| <b>UK-E9</b>  | M |  | 50              | 17 | NA  | 21 | 65 | 3 | 41    | PCM     |     |  |
| <b>UK-E7</b>  | M |  | 32 <sup>†</sup> | 26 | NA  | 10 | 91 | 4 | 32    |         |     |  |
| <b>UK-E10</b> | M |  | 61 <sup>†</sup> | 56 | NA  | 30 | 88 | 4 | 61    | AF      |     |  |
| <b>UK-E11</b> | M |  | 60              | 52 | YES | 18 | 80 | 3 | 52    |         |     |  |
| <b>UK-F1</b>  | M |  | 71              | 59 | Yes | 27 | 71 | 3 | 60    | PCM     |     |  |
| <b>UK-F3</b>  | M |  | 42 <sup>†</sup> | 29 | NA  | 13 | 62 | 4 | 42    |         |     |  |
| <b>UK-F4</b>  | M |  | 57 <sup>†</sup> | 52 | No  | 45 | 71 | 4 | 57    |         |     |  |
| <b>UK-F5</b>  | F |  | 27              | 13 | No  | 20 | 94 | 3 | 16    | PCM     |     |  |
| <b>UK-F6</b>  | M |  | 55              | 21 | NA  | 20 | 87 | 3 | 45    |         |     |  |
| <b>UK-F7</b>  | F |  | 64              | 54 | No  | 49 | 57 | 2 |       |         |     |  |
| <b>UK-F9</b>  | M |  | 51 <sup>†</sup> | 50 | NA  | 23 | 77 | 3 | 51    |         |     |  |
| <b>UK-F10</b> | M |  | 50              | 36 | NA  | 21 | 91 | 2 |       | AF, ICD |     |  |
| <b>UK-F11</b> | M |  | 52 <sup>†</sup> | 52 | NA  | 23 | 73 | 4 | 52    |         |     |  |
| <b>UK-G2</b>  | F |  | 44              | 31 | NA  | 30 | 63 | 2 |       |         |     |  |
| <b>UK-G3</b>  | M |  | 58 <sup>†</sup> | 56 | NA  | 40 | 76 | 4 | 58    |         |     |  |
| <b>UK-G5</b>  | F |  | 17 <sup>†</sup> | 16 | No  | 44 | 77 | 4 | 17    |         |     |  |

|               |   |  |                 |    |    |    |    |   |    |  |  |  |
|---------------|---|--|-----------------|----|----|----|----|---|----|--|--|--|
| <b>UK-G6</b>  | M |  | 46 <sup>†</sup> | 45 | NA | 34 | 67 | 4 | 46 |  |  |  |
| <b>UK-G8</b>  | F |  | 61              | 47 | No | 30 | 61 | 3 | 57 |  |  |  |
| <b>UK-G11</b> | M |  | 67              | 56 | No | 28 | 80 | 3 | 59 |  |  |  |
| <b>UK-H3</b>  | M |  | 62              | 51 | No | 17 | 72 | 3 | 52 |  |  |  |
| <b>UK-H4</b>  | M |  | 57              | 47 | No | 11 | 78 | 3 | 47 |  |  |  |
| <b>UK-H8</b>  | F |  | 66              | 56 | No | 30 | 71 | 3 | 57 |  |  |  |
| <b>UK-H9</b>  | M |  | 64              | 54 | No | 48 | 93 | 3 |    |  |  |  |
| <b>UK-H12</b> | M |  | 46 <sup>†</sup> | 46 | No | 10 | NA | 4 | 46 |  |  |  |

Footnotes for symbols (†, †, †, †, †) and abbreviations are defined in Supplementary Appendix Table 9.

Additional abbreviations used: AVR, aortic valve replacement; RVEF, right ventricular ejection fraction.

**Supplementary Appendix Table 11: Clinical characteristics of DCM Group C probands**

| Subject                 | Sex | BSA (m2) | Current age (yr)† | Age of Dx (yr) | Family Hx | LVEF (%)‡ | FS (%)‡ | LVEDD (mm)‡ | NYHA class¶ | Age at VAD, Tx, Death (yr)^ | Comments | Gene | Mutation(s)* |
|-------------------------|-----|----------|-------------------|----------------|-----------|-----------|---------|-------------|-------------|-----------------------------|----------|------|--------------|
| <b>TSSDC011-450</b>     | M   | 2.1      | 53                | 45             | No        | 37        | 12      | 82          | 2           |                             |          | TTN  | p.Arg2083fs  |
| <b>DNFDC144-05-0444</b> | F   | 2.18     | 54                | 32             | Yes       | 45        | NA      | 57          | 2           |                             |          | TTN  | p.Trp16359X  |
| <b>TSFDC023-300</b>     | F   | 1.75     | 38                | 20             | Yes       | 26        | 15      | 60          | 1           |                             |          | TTN  | p.Lys16782   |
| <b>DNFDC116-04-1545</b> | M   | 1.96     | 33                | 21             | Yes       | 40        | 15      | 54          | 1           |                             |          | TTN  | p.Arg17295X  |
| <b>TSFDC050-115</b>     | M   | 1.74     | 53                | 35             | Yes       | 24        | 13      | 70          | 3           |                             |          | TTN  | p.Arg17470X  |
| <b>TSFDC017-253-2</b>   | M   | 2.13     | 72                | 65             | Yes       | 40        | 22      | 59          | 1           |                             |          | TTN  | p.Glu17715fs |
| <b>DNFDC103-03-0941</b> | M   | 2.48     | 57                | 45             | Yes       | 30        | 10      | 74          | 2.5         |                             |          | TTN  | p.Glu17783X  |
| <b>DNFDC142-05-0569</b> | M   | 1.79     | 30                | 23             | Yes       | 20        | 15      | 69          | 2.5         |                             |          | TTN  | p.Arg18985X  |
| <b>DNFDC088-02-1900</b> | F   | 2.04     | 40                | 38             | Yes       | 25        | NA      | 50          | 2           |                             |          | TTN  | p.Trp26632X  |
| <b>DNFDC081-02-1564</b> | M   | 2.13     | 45                | 43             | Yes       | 20        | 13      | 63          | 4           | 45                          |          | TTN  | p.Lys27016X  |
| <b>TSSDC019-268</b>     | F   | 1.45     | 67                | 60             | No        | 21        | 13      | 70          | 4           |                             |          | TTN  | p.Trp29318X  |
| <b>TSFDC002-23</b>      | M   | 1.79     | 57                | 43             | Yes       | 29        | 10      | 72          | 1           |                             |          | TTN  | p.Arg29415X  |
| <b>TSFDC033-434</b>     | M   | 2.0      | 40                | 19             | Yes       | 24        | 10      | 72          | 4           |                             |          | TTN  | p.Asn30348fs |
| <b>TSFDC004-118</b>     | M   |          | 41                | 37             | Yes       | 18        | 10      | 57          | 3           | 41                          |          |      |              |
| <b>DNFDC050-02-2210</b> | F   |          | 36                | 29             | Yes       | 43        | 22      | 56          | 2           |                             |          |      |              |
| <b>DNFDC096-03-0005</b> | F   |          | 37                | 36             | No        | 37        | NA      | NA          | NA          |                             |          |      |              |
| <b>TSFDC049-4</b>       | M   |          | 64                | 45             | Yes       | 29        | 18      | 79          | 2           |                             |          |      |              |
| <b>TSXLC002-22</b>      | M   |          | 38                | 19             | Yes       | 25        | 7       | 83          | 2           |                             |          |      |              |
| <b>TSFDC007-28</b>      | F   |          | 42                | 20             | Yes       | 20        | 11      | 73          | 2           |                             |          |      |              |
| <b>TSFDC047-120</b>     | M   |          | 35                | 30             | Yes       | 39        | 12      | 52          | 4           | 35                          |          |      |              |
| <b>TSXLC001-131</b>     | M   |          | 31                | 31             | Yes       | 28        | 15      | 60          | 4           | 42                          |          |      |              |
| <b>TSFDC010-134</b>     | M   |          | 46                | 36             | No        | 29        | 15      | 71          | 3           |                             |          |      |              |
| <b>TSFDC003-136</b>     | F   |          | 51                | 54             | Yes       | 34        | NA      | 62          | 1           |                             |          |      |              |
| <b>TSLVN002-156</b>     | M   |          | 24                | 18             | Yes       | 17        |         | 74          | 1           |                             |          |      |              |
| <b>TSLVN001-172</b>     | F   |          | 57                | 41             | Yes       | 35        | 18      | 56          | 1           |                             |          |      |              |
| <b>TSFDC013-206</b>     | F   |          | 26 <sup>†</sup>   | 25             | Yes       | NA        |         | 51          | 4           | 26                          |          |      |              |
| <b>TSFDC014-208</b>     | F   |          | 60                | 43             | No        | 41        | 21      | 62          | 1           |                             |          |      |              |
| <b>TSFDC015-230-2</b>   | M   |          | 49                | 34             | Yes       | 38        | 24      | 63          | 1           |                             |          |      |              |
| <b>TSFDC016-254-2</b>   | M   |          | 59                | 44             | Yes       | 32        | 20      | 66          | 2           |                             |          |      |              |
| <b>TSFDC026-311</b>     | M   |          | 27                | 14             | Yes       | 27        | 16      | 53          | 4           | 27                          |          |      |              |
| <b>TSFDC029-409</b>     | F   |          | 59                | 46             | Yes       | 42        | 20      | 56          | 2           |                             |          |      |              |
| <b>TSFDC027-419</b>     | M   |          | 52 <sup>†</sup>   | 35             | Yes       | 22        | 17      | 69          | 4           | 52                          |          |      |              |
| <b>TSFDC032-430</b>     | M   |          | 39                | 22             | Yes       | 23        | 8       | 76          | 3           |                             |          |      |              |
| <b>TSFDC031-438</b>     | M   |          | 48 <sup>†</sup>   | 44             | Yes       | 17        | 5       | 75          | 4           | 48                          |          |      |              |
| <b>DNFDC020-99-0824</b> | M   |          | 60                | 55             | Yes       | 45        | 20      | 59          |             | 3                           |          |      |              |
| <b>DNFDC010-01-0045</b> | M   |          | 58                | 56             | Yes       | 45        | NA      | 71          | 3           |                             |          |      |              |

|                  |   |  |                 |    |     |      |    |    |     |    |                    |  |  |
|------------------|---|--|-----------------|----|-----|------|----|----|-----|----|--------------------|--|--|
| DNFDC053-01-0081 | M |  | 42              | 41 | Yes | 60   | 34 | 60 | 1   |    | Abn LV wall motion |  |  |
| DNFDC058-01-0341 | F |  | 37              | 31 | Yes | 32   | NA | NA | 2   |    |                    |  |  |
| DNFDC055-01-0439 | F |  | 39              | 38 | Yes | 10   | 5  | 90 | 2   |    |                    |  |  |
| TSFDC036-01-0729 | M |  | 50              | 40 | Yes | 48   | 27 | 63 | 4   | 50 |                    |  |  |
| TSFDC039-01-0731 | F |  | 55              | 54 | Yes | 23   | 26 | 69 | 4   | 55 |                    |  |  |
| DNFDC054-01-0937 | M |  | 70              | 56 | Yes | 28.5 | NA | NA | 2   |    |                    |  |  |
| DNFDC004-01-1624 | M |  | 35              | 21 | Yes | NA   | NA | NA | 2   |    |                    |  |  |
| DNFDC065-01-2260 | M |  | 66              | 55 | Yes | 37   | 18 | 55 | 2   |    |                    |  |  |
| DNFDC066-01-2393 | F |  | 39              | 34 | Yes | 50   | 23 | 57 | 1   |    |                    |  |  |
| DNFDC068-02-0053 | M |  | 47              | 45 | Yes | 50   | 18 | 67 | 4   | 47 |                    |  |  |
| TSFDC040-02-0169 | M |  | 37              | 28 | Yes | 52   | 25 | 61 | 1   |    |                    |  |  |
| TSFDC041-02-0176 | M |  | NA              | 45 | Yes | 24   | 6  | 63 | 2   |    |                    |  |  |
| TSFDC042-02-0191 | F |  | 60              | 46 | Yes | 22   | 15 | 72 | 4   | 46 |                    |  |  |
| TSFDC038-02-0225 | F |  | 62              | 48 | Yes | 46   | 20 | 58 | 1   |    |                    |  |  |
| DNFDC071-02-0394 | F |  | 76              | 58 | Yes | 45   | 29 | 41 | 2   |    |                    |  |  |
| DNFDC073-02-0502 | M |  | 19              | 18 | Yes | 25   | 11 | 56 | 2   |    |                    |  |  |
| DNFDC072-02-0503 | M |  | 44 <sup>†</sup> | 32 | No  | 19   | 12 | 89 | 4   | 44 |                    |  |  |
| DNFDC069-02-0646 | F |  | 36              | 28 | Yes | 30   | 22 | 62 | 2   |    |                    |  |  |
| DNFDC074-02-0911 | F |  | 53              | 46 | Yes | 35   | NA | NA | 2   |    |                    |  |  |
| DNFDC077-02-0954 | M |  | 46 <sup>†</sup> | 44 | Yes | 10   | NA | NA | 46  |    |                    |  |  |
| TSFDC018-02-1027 | M |  | 74              | 33 | Yes | 40   | 19 | 61 | 2   |    |                    |  |  |
| TSFDC045-02-1089 | M |  | 60              | 49 | Yes | 40   | 20 | 64 | 2   |    |                    |  |  |
| TSFDC025-02-1092 | M |  | 41              | 28 | Yes | 22   | 21 | 70 | 2   |    |                    |  |  |
| TSFDC044-02-1097 | M |  | 34              | 26 | Yes | 43   | 18 | 56 | 1   |    |                    |  |  |
| DNFDC078-02-1192 | M |  | 48 <sup>†</sup> | 39 | Yes | 20   | NA | NA | 3   | 48 |                    |  |  |
| DNFDC079-02-1517 | F |  | 34              | 33 | Yes | 20   | 15 | 55 | 3   |    |                    |  |  |
| DNFDC029-02-1532 | F |  | 76              | 62 | Yes | 25   | 13 | NA | 2   |    |                    |  |  |
| DNFDC083-02-1566 | F |  | 69              | 38 | Yes | 30   | 20 | 74 | 2   |    |                    |  |  |
| DNFDC030-02-1612 | M |  | 40              | 29 | Yes | 21   | 9  | 75 | 3   |    |                    |  |  |
| DNFDC087-02-1758 | F |  | 48              | 22 | Yes | 11   | 9  | 81 | 3   |    |                    |  |  |
| DNFDC013-02-1902 | F |  | 44              | 37 | Yes | 37   | 11 | 62 | 2   |    |                    |  |  |
| DNFDC042-02-2037 | F |  | 53              | 52 | Yes | 20   | 11 | 64 | 4   | 53 |                    |  |  |
| DNFDC034-02-2053 | M |  | 64              | 53 | No  | 35   | NA | 74 | 3   |    |                    |  |  |
| DNFDC090-02-2104 | M |  | 47              | 47 | Yes | 41   | 22 | 84 | 2   |    |                    |  |  |
| DNFDC089-02-2151 | F |  | 38              | 31 | Yes | 25   | 14 | 80 | 3   |    |                    |  |  |
| TSFDC009-02-2276 | M |  | 67              | 44 | Yes | 26   | 13 | 83 | 1   |    |                    |  |  |
| TSFDC022-02-2304 | F |  | 60              | 44 | No  | 40   | 28 | 56 | 1   |    |                    |  |  |
| DNFDC092-02-2349 | F |  | 39              | 38 | Yes | 45   | NA | NA | 2   |    |                    |  |  |
| DNFDC091-02-2555 | M |  | 43              | 35 | Yes | 31   | 20 | 54 | 2.5 |    |                    |  |  |
| DNFDC099-03-0432 | F |  | 32              | 30 | Yes | 17   | 16 | 66 | 3   |    |                    |  |  |
| DNFDC100-03-0433 | M |  | 49              | 39 | Yes | 27   | 13 | 80 | 3   | 49 |                    |  |  |
| DNFDC108-03-2056 | F |  | 61              | 49 | Yes | 29   | 14 | NA | 2   |    |                    |  |  |
| DNFDC016-04-0243 | F |  | 38              | 36 | Yes | 15   | 15 | 60 | 3   |    |                    |  |  |

|                  |   |  |                 |    |     |    |    |    |     |    |                                    |  |
|------------------|---|--|-----------------|----|-----|----|----|----|-----|----|------------------------------------|--|
| DNFDC109-04-0326 | F |  | 59              | 58 | Yes | 30 | 13 | 67 | 2   |    |                                    |  |
| DNFDC014-04-0567 | M |  | 50              | 34 | Yes | 17 | NA | NA | 3   |    |                                    |  |
| DNFDC114-04-0871 | F |  | 42              | 41 | Yes | 40 | 23 | 47 | 2   |    |                                    |  |
| DNFDC112-04-0906 | F |  | 55              | 38 | Yes | 19 | 12 | 66 | 3   |    |                                    |  |
| DNFDC117-04-1674 | M |  | 60              | 50 | Yes | 15 | 11 | 55 | 2.5 |    |                                    |  |
| DNFDC123-05-0110 | F |  | 65              | 63 | Yes | 30 | 26 | 49 | 2.5 |    |                                    |  |
| DNFDC133-05-0199 | M |  | 50              | 47 | No  | 17 | 5  | 66 | 2   |    |                                    |  |
| DNFDC039-05-0234 | M |  | 54              | 50 | Yes | 34 | 17 | 64 | 2.5 |    |                                    |  |
| DNFDC131-05-0381 | F |  | 28              | 24 | Yes | 25 | 11 | 64 | 3   |    |                                    |  |
| DNFDC139-05-0394 | M |  | 45              | 30 | No  | 33 | NA | NA | 3   |    |                                    |  |
| DNFDC147-05-0548 | F |  | 36              | 33 | Yes | 25 | NA | 64 | 2   |    |                                    |  |
| DNFDC155-05-0698 | F |  | 49              | 43 | Yes | 47 | 21 | 50 | 2   |    |                                    |  |
| DNFDC141-05-0716 | F |  | 22              | 18 | Yes | 18 | 14 | 64 | 2.5 |    |                                    |  |
| TSAR004-6        | M |  | 73              | 53 | Yes | 50 | 32 | 61 | 1   |    |                                    |  |
| TSAR003-35-2     | M |  | 14              | 12 | Yes | 31 | 7  | 56 | 2   | 14 |                                    |  |
| TSAR005-125      | M |  | 37              | 19 | Yes | 37 | 18 | 65 | 1   |    |                                    |  |
| TSFDC001-98-38   | M |  | 51              | 29 | Yes | 21 | 11 | 87 | 1   |    |                                    |  |
| TSSDC128-220     | M |  | 42              | 38 | No  | 37 | 24 | 59 | 4   | 42 |                                    |  |
| TSSDC012-273     | M |  | 69              | 53 | Yes | 38 | 19 | 64 | 2   |    |                                    |  |
| TSSDC116-292     | M |  | 24              | 23 | No  | 18 | 13 | 61 | 4   | 24 |                                    |  |
| TSSDC020-395     | F |  | 56              | 39 | No  | 33 | 20 | 59 | 2   |    |                                    |  |
| TSSDC009-398-2   | F |  | 59              | 46 | Yes | 18 | 16 | 89 | 4   | 59 |                                    |  |
| TSSDC024-401     | M |  | 50 <sup>†</sup> | 38 | No  | 17 | 15 | 89 | 4   | 50 |                                    |  |
| TSSDC026-433     | F |  | 71              | 51 | No  | 25 | 10 | 68 | 2   |    |                                    |  |
| TSSDC027-435     | M |  | 50 <sup>†</sup> | 44 | No  | 29 | 9  | 78 | 2   |    |                                    |  |
| TSSDC028-436     | M |  | 32              | 25 | No  | 22 | 10 | 79 | 2   | 32 |                                    |  |
| TSSDC030-439     | M |  | 61              | 44 | No  | 28 | 10 | 79 | 3   |    |                                    |  |
| TSSDC031-441     | M |  | 69 <sup>†</sup> | 56 | No  | 29 | 19 | 67 | 2   | 69 |                                    |  |
| TSSDC032-442     | M |  | 74              | 57 | Yes | 37 | 11 | 77 | 2   |    |                                    |  |
| TSSDC033-443     | M |  | 58              | 46 | No  | 26 | 9  | 64 | 1   |    |                                    |  |
| TSSDC002-445-2   | M |  | 51              | 39 | No  | 17 | 6  | 77 | 4   | 51 |                                    |  |
| TSFDC005-127     | F |  | 52              | 34 | Yes | 35 | 16 | 60 | 4   |    |                                    |  |
|                  |   |  |                 |    |     |    |    |    |     |    |                                    |  |
| TSFDC012-148-2   | M |  | 58              | 41 | Yes | 61 | 24 | 50 | 1   |    | Familial<br>Screening;<br>NSVT, AF |  |
| TSSDC004-447     | M |  | 76              | 55 | No  | 45 | 16 | 83 | 3   |    |                                    |  |
| TSSDC005-448     | M |  | 65 <sup>†</sup> | 53 | No  | NA | 12 | 67 | 4   | 65 |                                    |  |
| TSSDC007-449     | M |  | 72              | 53 | No  | 25 | 13 | 70 | 2   |    |                                    |  |
| TSSDC014-451     | M |  | 72 <sup>†</sup> | 48 | No  | 42 | 14 | 65 | 3   | 72 |                                    |  |
| TSSDC015-452     | M |  | 48              | 48 | No  | 40 | 30 | 63 | 1   |    |                                    |  |
| DNFDC052-01-0131 | M |  | 21              | 17 | Yes | NA | 27 | 57 | 2   | 21 |                                    |  |
| DNFDC057-01-0987 | F |  | 59              | 48 | Yes | 30 | 25 | NA | 2   | 59 |                                    |  |
| DNFDC084-02-1567 | F |  | 52              | 42 | No  | 10 | NA | 69 |     | 2  |                                    |  |
| DNFDC095-02-2523 | M |  | 54              | 44 | Yes | 10 | 6  | 78 | 2   |    |                                    |  |

|                           |   |  |    |    |     |    |    |    |    |    |                    |  |  |
|---------------------------|---|--|----|----|-----|----|----|----|----|----|--------------------|--|--|
| <b>DNFDC113-04-0881</b>   | F |  | 45 | 44 | Yes | 25 | NA | NA | NA | NA |                    |  |  |
| <b>DNFDC138-05-0395</b>   | F |  | 27 | 21 | No  | 20 | 5  | 53 | 3  |    |                    |  |  |
| <b>DNFDC080-02-1405</b>   | M |  | 52 | 33 | Yes | 30 | 7  | 53 | 3  | 52 |                    |  |  |
| <b>DNFDC094-02-2524</b>   | M |  | 68 | 52 | yes | 21 | 20 | 63 | 1  |    |                    |  |  |
| <b>DNFDC101-03-0942</b>   | F |  | 61 | 50 | No  | 25 | 14 | 60 | 2  |    |                    |  |  |
| <b>DNFDC104-03-2029</b>   | F |  | 37 | 27 | No  | 30 | 16 | 60 | 2  |    |                    |  |  |
| <b>DNFDC110-04-0347</b>   | M |  | 59 | 58 | No  | 28 | 12 | 58 | 2  |    |                    |  |  |
| <b>DNFDC119-04-1877</b>   | M |  | 55 | 49 | Yes | 15 | 23 | 70 | 2  |    |                    |  |  |
| <b>DNFDC127-05-0160</b>   | M |  | 55 | 44 | No  | 18 | NA | NA | 3  |    |                    |  |  |
| <b>DNFDC140-05-0355</b>   | F |  | 39 | 31 | No  | 40 | 25 | 60 | 2  |    |                    |  |  |
| <b>DNFDC075-02-0970</b>   | M |  |    | 31 | Yes | 52 |    |    |    |    |                    |  |  |
| <b>DNFDC136-05-0301</b>   | F |  |    | 23 | No  | 50 |    |    |    |    |                    |  |  |
| <b>TSSDC010-01-0745-2</b> | M |  |    | 56 | No  | 49 |    |    |    |    |                    |  |  |
| <b>DNFDC102-03-2097</b>   | F |  |    | 27 | No  | 48 |    |    |    |    |                    |  |  |
| <b>TSFDC067-02-2315</b>   | M |  |    | 13 | No  | 47 |    |    |    |    |                    |  |  |
| <b>DNFDC093-03-0646</b>   | M |  |    | 58 | No  | 47 |    |    |    |    |                    |  |  |
| <b>DNFDC047-02-0952</b>   | F |  |    | 49 | No  | 46 |    |    |    |    |                    |  |  |
| <b>TSFDC054-03-0818</b>   | M |  |    | 27 | No  | 46 |    |    |    |    |                    |  |  |
| <b>DNFDC107-03-1827</b>   | F |  |    | 40 | Yes | 42 |    |    |    |    |                    |  |  |
| <b>DNFDC026-02-1565</b>   | M |  |    | 63 | No  | 36 |    |    |    |    |                    |  |  |
| <b>TSFDC069-02-2322</b>   | F |  |    | 50 | No  | 35 |    |    |    |    |                    |  |  |
| <b>DNFDC059-01-2291</b>   | M |  |    | 58 | No  | 33 |    |    |    |    |                    |  |  |
| <b>TSSDC058-03-0817</b>   | M |  |    | 20 | No  | 30 |    |    |    |    |                    |  |  |
| <b>DNFDC118-04-1787</b>   | M |  |    | 22 | No  | 29 |    |    |    |    |                    |  |  |
| <b>TSSDC056-02-0174</b>   | F |  |    | 47 | No  | 28 |    |    |    |    |                    |  |  |
| <b>TSSDC060-01-0725</b>   | M |  |    | 49 | No  | 13 |    |    |    |    |                    |  |  |
| <b>DNFDC008-02-2451</b>   | F |  | 66 | 61 | Yes | 55 | 29 | NA | 4  | 66 | Rapid Progression  |  |  |
| <b>DNFDC003-02-01704</b>  | F |  | 59 | 41 | Yes | 56 | 35 | NA |    |    | Familial Screening |  |  |

Footnotes for symbols (†,‡,§,||,\*) and abbreviations are defined in Supplementary Appendix Table 9.

Additional abbreviations used: AVR, aortic valve replacement; RVEF, right ventricular ejection fraction.

**Supplementary Appendix Table 12: Clinical findings in DCM families with *TTN* truncating mutations\***

| Pedigree        | ID      | Sex | Current age (yr) or death† | Age at diag-nosis (yr) | FS (%)‡ | LVEDD (mm)‡ | NYHA class¶ | Age of VAD/Tx/Death (yr)^ | CommentI                   | Clinical Status | TTN Genotype(s)*           |
|-----------------|---------|-----|----------------------------|------------------------|---------|-------------|-------------|---------------------------|----------------------------|-----------------|----------------------------|
| <b>DNFDC081</b> | 02-1564 | M   | 45                         | 43                     | 13      | 63          | 4           | Tx(45)                    | EF=20%                     | A               | p.Lys27016X                |
|                 | 02-1663 | M   | 33                         | 33                     | 30.2    | 53          | 1           |                           | IVCD                       | A               | +                          |
| <b>DNFDC088</b> | 02-1900 | F   | 40                         | 38                     | 16      | 50          | 2           |                           | EF=25%                     | A               | p.Trp26632X                |
|                 | 2395    | M   | 70                         | 61                     | 39      | 54          | 1           |                           |                            | I               | -                          |
|                 | 1901    | F   | 58                         | 58                     | 33      | 55          | 1           |                           | Diastolic Dysfunction, TWA | I               | +                          |
|                 | 05-0427 | M   | 47                         | 45                     | NA      | NA          | 4           | Tx(47)                    | ST, RBBB, LAFB             | A               | +                          |
| <b>DNFDC103</b> | 03-0941 | M   | 57                         | 45                     | 10      | 74          | 2.5         |                           | TWA, 1AVB<br>EF=30%        | A               | p.Glu17783X                |
|                 | 05-1266 | M   | 51                         | 48                     | NA      | NA          | 2           |                           | EF=10%                     | A               | +                          |
| <b>DNFDC142</b> | 05-0569 | M   | 30                         | 23                     | 15      | 69          | 2.5         |                           | TWA, LAFB,<br>IVCD, EF=20% | A               | p.Arg18985X                |
|                 | 0568    | F   | 53                         | 53                     | NA      | NA          | 2           |                           |                            | I               | +                          |
| <b>MAO</b>      | 92      | F   | 36                         | 17                     | 22.4    | 63          | 2           |                           | EF=37%<br>ICD(33)          | A               | p.Trp976Arg<br>p.Arg19560X |
|                 | 9       | M   | 49+                        | 47                     | 32      | 50          | 1           | 49                        | Septic Shock†              | U               | p.Trp976Arg                |



|            |      |   |     |    |      |    |    |       |                           |   |                        |
|------------|------|---|-----|----|------|----|----|-------|---------------------------|---|------------------------|
|            | 90   | F | 49  | NA | NA   | NA | NA |       |                           | I | p.Arg19560X            |
|            | 91   | F | 40  | 40 | 35.3 | 51 | 1  |       |                           | I | p.Arg19560X            |
|            | 93   | M |     | 19 |      |    | 1  |       |                           | I | pArg19560X             |
| <b>MDD</b> | 22   | F | 73  | 57 | 18   | 58 | 2  |       | EF=20%<br>ICD(70)         | A | p.Asp14909             |
|            | 21   | M | 31† | 31 |      |    |    |       | CHF                       | A | NA                     |
|            | 23   | F | 72  | 58 |      |    |    |       | EF=20%                    | A | NA(+)                  |
|            | 231  | M | 45  | 45 |      |    |    |       | AF(39)                    | I | +                      |
|            | 2311 | M | 18  | 18 | 35.7 | 56 | 1  |       | AF(16)                    | I | +                      |
|            | 2312 | M | 16  | 16 | 33.3 | 48 |    |       | NSR                       | I | -                      |
| <b>MEK</b> | 111  | M | 24† | 17 | 17   | 77 | 4  | 15,24 | Tx(15)                    | A | p.Pro22582fs           |
|            | 1    | F | 72  | 50 | 34   | 50 | NA |       | STTWA; Q-<br>waves,CHF    | A | +                      |
|            | 11   | M | 41† | 25 | 8    | 75 | 4  | 36    | 1AVB, LAFB,<br>TWA Tx(36) | A | +                      |
|            | 110  | F | 43  | NA | NA   | NA | NA |       |                           | U | -                      |
|            | 112  | F | 19  | NA | NA   | NA | NA |       |                           | I | +                      |
|            | 12   | M | 33† | 30 | NA   | NA | 4  | 33    | CHF(33)                   | A | NA                     |
| <b>MEQ</b> | 132  | M | 25  | 22 | 19.3 | 57 | 1  |       | SB, EF=45%                | A | p.Pro13298_Thr17642dup |
|            | 12   | M | 56  | 33 | NA   | NA | 4  | 50    | NSVT, CHF(49)<br>Tx(50)   | A | NA                     |
|            | 13   | M | 46† | 41 | NA   | NA | NA | 42    | SCD(46)                   | A | NA(+)                  |
|            | 131  | M | 33  | 33 | 38.8 | 54 |    |       |                           | I | -                      |
| <b>MEW</b> | 11   | M | 37  | 20 | NA   | 50 | 4  | 31    | EF=25%<br>Tx(30)          | A | p.Arg18985X            |

|            |     |   |     |    |      |      |    |    |                                   |   |              |
|------------|-----|---|-----|----|------|------|----|----|-----------------------------------|---|--------------|
|            | 1   | M | 63  | 62 | NA   | NA   | 4  | 43 | Tx(43)                            | A | NA(+)        |
|            | 21  | M | 32  | 23 | NA   | NA   | NA |    | ICD                               | A | +            |
| <b>MHG</b> | 23  | M | 52  | 31 | 14.3 | 77   | 4  | 52 | AF, EF=29%<br>ICD(46)             | A | p.Ala22353fs |
|            | 1   | F | 57† | NA | NA   | NA   | NA | 58 | Lung Ca                           | U | NA           |
|            | 12  | M | 65  | 62 | 43.2 | 44   | 1  |    | SB                                | U | -            |
|            | 15  | F | 57  | 41 | 32.8 | 61   | 2  |    | Morbid Obesity<br>Type II DM, PCM | I | -            |
|            | 152 | F | 27  | 27 | 50   | 46   |    |    |                                   | I | -            |
|            | 2   | F | 66† | 59 | NA   | NA   | NA | 66 | CHF                               | A | NA(+)        |
|            | 21  | F | 63  | 48 | 31.9 | 38.3 | 2  |    | LBBB, ICD                         | A | +            |
|            | 211 | M | 41  | 37 | 28.2 | 44.7 |    |    |                                   | I | +            |
|            | 212 | M | 41  | 37 | 32.8 | 45.4 |    |    |                                   | I | +            |
|            | 22  | F | 61  | 42 | 30.1 | 55.2 | 2  |    | 1AVB, LBBB<br>EF=22%              | A | +            |
|            | 221 | F | 35  | 32 | 30.1 | 52.2 | 1  |    | NSR                               | I | +            |
|            | 222 | M | 32  | 29 |      |      |    |    | NSR                               | I | -            |
|            | 231 | M | 33  | 33 |      |      |    |    | NSR                               | I | -            |
|            | 3   | F | 25† |    |      |      |    |    | Leukemia†                         | I | NA           |
|            | 31  | M | 52  | 52 | 46.4 | 48.1 | 1  |    | IVCD                              | U | -            |
|            | 311 | F | 28  | 28 | 38   | 47   | 1  |    |                                   | I | -            |
|            | 4   | F | 55† | 50 | NA   | NA   | NA | 54 | CHF                               | A | NA(+)        |

|  |    |   |     |    |      |      |    |    |                                  |   |       |
|--|----|---|-----|----|------|------|----|----|----------------------------------|---|-------|
|  | 41 | F | 56  | NA | NA   | NA   | NA |    |                                  | I | -     |
|  | 43 | F | 50  | 46 | 12.2 | 57.3 | 3  |    | NSVT, STTWA<br>ICD(50)           | A |       |
|  | 46 | F | 48  | 48 | 32   | 50   | 1  |    |                                  | I | -     |
|  | 47 | M | 42  | NA | 26   | 53.5 | 1  |    | NSR                              | A | +     |
|  | 48 | M | 42  | 43 | 16.7 | 72   | NA |    | ICD(42)                          | A | NA    |
|  | 6  | M | 41+ | 37 | NA   | NA   | 3  | 41 | NSVT, CHF(37)                    | A | NA    |
|  | 61 | M | 49  | 49 | 30.5 | 40.6 | NA |    | NSR                              | U | -     |
|  | 62 | F | 47  | 47 | 41.7 | 34.3 | NA |    | TWA                              | U | -     |
|  | 63 | F | 45  | 45 | 24.7 | 38.1 | NA |    | TWA                              | I | -     |
|  | 64 | M | 42  | NA | 38.1 | 40.4 | NA |    | NSR                              | U | -     |
|  | 7  | M | 61+ | 56 | NA   | 68   | NA | 61 | ST, CHF                          | A | NA(+) |
|  | 70 | F | 65  | NA | NA   | NA   | NA |    |                                  | U | -     |
|  | 71 | F | 45  | 45 | 34.9 | 47   | 1  |    | NSR                              | U | -     |
|  | 72 | M | 44  | 44 | 30.9 | 57.2 | 1  |    | NSR                              | A | +     |
|  | 73 | F | 43  | NA | 36.3 | 38.6 | 1  |    | SB, long QTc,<br>TWA             | I | -     |
|  | 74 | M | 42  | NA | 19.2 | 49.9 | NA |    | SB                               | I | +     |
|  | 8  | F | 63+ | 59 | NA   | NA   | 2  | 63 | Long QTc, TWA,<br>CHF<br>NI Cors | A | +     |
|  | 82 | M | 40  | 31 | 9.6  | 55.3 | 2  |    | LVH, LAFB, TWA                   | A | +     |
|  | 83 | F | 42  | 38 | 43.2 | 45.5 | 2  |    |                                  | I | +     |

|            |     |   |     |    |      |      |     |    |                                 |   |             |
|------------|-----|---|-----|----|------|------|-----|----|---------------------------------|---|-------------|
|            | 84  | F | 48  | 44 | 40.6 | 43.3 | 2   |    | SB, TWA                         | I | +           |
|            | 9   | F | 66  | 62 | 41.6 | 39.9 | 1   |    | NSR                             | U | -           |
|            | 98  | M | 53† | NA | NA   | NA   | NA  | 53 | SCD(53)                         | I | NA          |
|            | 981 | F | 42  | 39 | 33   | 43   |     |    |                                 | U | -           |
|            | 99  | F | 59  | 56 | 33.8 | 41.7 | 1   |    | PVC, MR                         | I | +           |
| <b>MHQ</b> | 12  | M | 42  | 38 | 9.7  | 72   | 3   |    | EF=17.5%<br>CHF, NSR<br>ICD(41) | A | p.Gln30081X |
|            | 1   | F | 64  | 64 | 37.2 | 43   | 1   |    | PAC                             | A | NA(+)       |
|            | 11  | F | 44  | 38 | 26.5 | 49   | 1   |    |                                 | U | -           |
| <b>MHX</b> | 11  | M | 58† | 52 | 8.2  | 61   | 3.5 |    | EF=32.5% CHF,<br>IVCD           | A | p.Lys31371X |
|            | 1   | M | 59† | 50 | NA   | NA   |     |    | DCM CHF                         | A | NA(+)       |
|            | 10  | F | 90  | 90 |      |      |     |    |                                 | U | -           |
|            | 12  | F | 59  | NA | 41.3 | 46   | 1   |    | TWA                             | U | -           |
|            | 13  | M | 51  | 50 | 27   | 63   | NA  |    | PVC, LVH, RBBB,<br>ICD(51)      | A | +           |
|            | 14  | M | 53  | NA | 36   | 50   | NA  |    | NSR                             | U | -           |
|            | 15  | F | 61  | 54 | 40   | 48   |     |    | ICD(56)<br>MRI:GdE              | I | +           |
|            | 16  | M | 63  |    |      |      |     |    | NI Echo                         | U | -           |
|            | 17  | M | 61† | 56 | 34   | 58   | 4   | 61 | CHF SCD                         | A | NA          |
|            | 18  | F | 66  | 52 | NA   | NA   | NA  |    | CHF;ICD                         | A | NA          |
| <b>MID</b> | 1   | M | 40  | 37 | 15.7 | 51   | 2   |    | PVC, TWA,<br>EF=34%             | A | p.Gln25689X |

|            |     |   |    |    |      |    |   |         |                                 |   |             |
|------------|-----|---|----|----|------|----|---|---------|---------------------------------|---|-------------|
|            | 2   | M | 48 | 41 | 19.6 | 56 | 1 |         |                                 | A | +           |
|            | 21  | M | 19 | 19 | 25.5 | 55 | 1 |         | JR                              | A | +           |
|            | 22  | M | 17 | NA | 38.3 | 60 | 1 |         |                                 | A | +           |
| <b>MIP</b> | 13  | M | 41 | 33 | 16.5 | 51 | 2 |         | EF=25%<br>CHF, NSVT,<br>ICD(33) | A | p.Trp27147X |
|            | 1   | M | 65 | 42 | 19.7 | 76 | 4 | 50 (Tx) | ST, 1AVB, ICD                   | A | +           |
|            | 11  | M | 45 | 44 | 9    | 64 | 2 |         | STTWA, ICD                      | A | +           |
|            | 111 | M | 27 | 27 |      |    | 1 |         |                                 | I | -           |
|            | 112 | M | 15 | 15 | 27.1 | 48 | 1 |         | NSR                             | I | +           |
|            | 113 | M | 12 | 12 | 33.3 | 48 | 1 |         | LVH, long QTc                   | I | +           |
|            | 12  | F | 44 | 44 | 27.7 | 47 | 1 |         | STTWA, PVC                      | I | +           |
|            | 121 | M | 19 | 19 | 34.6 | 52 | 1 |         | NSR                             | I | -           |
|            | 122 | M | 18 | 18 | 30.8 | 52 | 1 |         | NSR                             | I | -           |
|            | 123 | M | 16 | 16 | 38   | 50 | 1 |         | NSR                             | I | -           |
|            | 131 | M | 10 | 10 | 45.2 | 42 | 1 |         | NSR                             | I | +           |
|            | 132 | M | 7  | 7  | 43.6 | 39 | 1 |         | NSR                             | I | -           |
|            | 14  | F | 40 | 40 | 40   | 50 | 1 |         | NSR                             | U | -           |
|            | 141 | F | 14 | 14 | 30.2 | 43 | 1 |         | NSR                             | I | -           |
|            | 142 | F | 10 | 10 | 37.8 | 45 | 1 |         | NSR                             | I | -           |
|            | 2   | M | 60 | 60 | 32.1 | 53 | 1 |         | IVCD                            | U | -           |

|            |     |   |     |    |      |      |   |    |                                |   |            |
|------------|-----|---|-----|----|------|------|---|----|--------------------------------|---|------------|
|            | 3   | M | 63  | 56 | 5.6  | 54   | 4 |    | AF                             | A | +          |
| <b>MIS</b> | 11  | F | 62† | 59 | 25.5 | 61   | 2 | 62 | EF=20% AF, CHF                 | A | p.Thr21135 |
|            | 1   | F | 65† | 65 |      |      |   |    | CHF, ICD                       | A | NA(+)      |
|            | 2   | F | 79  | 79 |      |      |   |    |                                | U | -          |
|            | 3   | F | 85  | 85 |      |      |   |    |                                | U | -          |
|            | 12  | M | 61  | 55 | 18   | 57   | 1 |    |                                | A | +          |
|            | 13  | M | 59  | 59 | 19   | 48.9 |   |    | CAD/MI<br>PCIx3                | I | -          |
|            | 132 | M | 35  | 35 | 28   | 51.6 | 1 |    |                                | I | -          |
|            | 14  | M | 37† | 27 | 13   | 76   | 4 |    | Tx(37)                         | A | NA         |
|            | 141 | M | 30  | 30 | 32.6 | 52   | 1 |    | EF=60%                         | I | -          |
|            | 142 | M | 29  | 29 | 27   | 46.7 | 2 |    | Epilepsy                       | I | -          |
|            | 19  | M | 50  |    |      |      |   |    | DCM reported                   | A | NA         |
| <b>MIV</b> | 14  | M | 50  | 26 | 9.5  | 63   | 3 | 49 | EF=20%<br>CHF, AF,<br>ICD(47)  | A | p.Asp14909 |
|            | 11  | M | 56  | 54 | 31.1 | 54.3 | 1 |    | NSR, CAD                       | I | -          |
|            | 12  | F | 53  | 52 | 22.3 | 54.3 | 1 |    | Long QTc, VT<br>ablation<br>X2 | A | +          |
|            | 121 | M | 22  | 20 | 13   | 76   | 4 |    | VAD(20)                        | A | +          |
|            | 13  | F | 52  | 52 | 34.2 | 44.7 | 1 |    | NRS                            | U | -          |
|            | 16  | M | 43  | 43 | 25.8 | 53.5 | 1 |    | NSVT, RV dilated<br>(55mm)     | A | +          |
|            | 2   | F | 81  | 81 | 12.4 | 49.2 | 1 |    |                                | A | +          |

|                 |       |   |    |    |      |      |   |    |                                |   |              |
|-----------------|-------|---|----|----|------|------|---|----|--------------------------------|---|--------------|
|                 | 21    | F | 51 | 51 | 35   | 53.2 | 1 |    | AVR/MVR                        | I | +            |
|                 | 23    | F | 48 | 48 | 33.3 | 55.5 | 1 |    | NSR                            | I | -            |
|                 | 24    | M | 46 | 46 | 34   | 54.5 | 1 |    |                                | I | -            |
| <b>TSFDC002</b> | 23    | M | 57 | 43 | 10   | 72   | 1 | 57 | PVC, LAFB,<br>EF=29%           | A | p.Arg29415X  |
|                 | 116   | M | 51 | 42 | 8.6  | 70   | 1 |    | TWA, LAFB                      | A | +            |
|                 | 190   | F | 72 | 66 | 22.4 | 58   | 3 |    | TWA, PVC,<br>RBBB, LAFB        | A | +            |
|                 | 205   | F | 52 | 47 | NA   | NA   | 3 |    | LAFB, ST                       | A | +            |
|                 | 26    | F | 18 | 13 | 32   | 50   | 1 |    | NSR, Abn LV wall<br>motion, MR | I | +            |
| <b>TSFDC017</b> | 253-2 | M | 72 | 65 | 22   | 59   | 1 |    | EF=40%                         | A | p.Glu17715fs |
|                 | 318   | M | 54 | 34 | 15   | 75   | 2 | 54 | AF, EF=17%                     | A | +            |
| <b>TSFDC033</b> | 434   | M | 40 | 19 | 10   | 72   | 4 |    | AF, TWA, ICD<br>EF=24%         | A | p.Asn30348fs |
|                 | 0173  | M | 35 | 26 | 16.2 | 68   | 1 | 35 | NSR                            | A | +            |
| <b>TSFDC050</b> | 115   | M | 53 | 35 | 13   | 70   | 3 |    | NSR, ICD<br>EF=24%             | A | p.Arg17470X  |
|                 | 1     | M | 50 | 48 | NA   | NA   | 3 | 50 |                                | A | NA(+)        |
|                 | 113   | F | 21 | 18 | 31   | 48   | 1 |    |                                | I | -            |
|                 | 114   | F | 61 | 40 | 10.3 | 68   | 2 |    | 1AVB, TWA ICD                  | A | +            |

\* Pedigrees are provided in Supplementary Fig. 1. Probands and the *TTN* truncating mutation are listed first among family

members. Footnotes for symbols (<sup>†</sup>†<sup>†</sup>) are defined in Supplementary Appendix Table 9. <sup>†</sup> Non-cardiac causes of death are indicated. Clinical status is denoted: A, affected; U, unaffected; I, indeterminate. \* TTN genotypes are +, mutation present; -, mutation absent; NA, genotype not available; NA(+), obligate carrier based on pedigree position, but genotype not available.

Abbreviations used are defined in Supplementary Appendix Table 9. Additional abbreviations used to describe electrophysiology are: NSR, normal sinus rhythm, LVH, electrocardiographic criteria for left ventricular hypertrophy; ST, sinus tachycardia; SB, sinus bradycardia; Q, Q waves; STTWA, ST and T-wave abnormality; TWA: T-wave abnormality; 1AVB, first degree atrioventricular block; LAFB, left anterior fascicular block; IVCD, intraventricular conduction delay; JR, junctional rhythm; RBB, right bundle branch block; LBBB, left bundle block; VT, ventricular tachycardia; PAC, premature atrial contractions; PVC, premature ventricular contractions; long QTc, prolonged corrected QT interval. Additional abbreviations to denote clinical findings are: Abn LV wall motion; abnormal left ventricular wall motion identified by echocardiography; CAD/MI, coronary artery disease/myocardial infarction; Diastolic Dysfunction, physician reported abnormal LV relaxation parameters; DM, diabetes mellitus; EF, ejection fraction; PCI, percutaneous coronary intervention SCD, sudden cardiac death; MRI:GdE, LV fibrosis identified by gadolinium enhance-MRI ; RV, right ventricle; VT ablation, ventricular tachycardia treated by ablation.



**Supplementary Appendix Table 13:** Likelihood of the odds (LOD) scores reflecting linkage between *TTN* mutation and DCM in individual families\*

| <b>Family</b> | <b>TTN variant</b> | <b>LOD score (pen=0.95)</b> | <b>LOD score (pen=0.80)</b> |
|---------------|--------------------|-----------------------------|-----------------------------|
| MEK           | Frameshift         | 0.29                        | 0.29                        |
| MEW           | Nonsense           | 0.17                        | 0.17                        |
| MHQ           | Nonsense           | 0.16                        | 0.12                        |
| MIP           | Nonsense           | 1.16                        | 1.04                        |
| MID           | Nonsense           | 0.59                        | 0.59                        |
| MHG           | Frameshift         | 3.57                        | 3.21                        |
| MEQ           | Duplication        | 0.00                        | 0.00                        |
| DNFDC081      | Nonsense           | 0.17                        | 0.17                        |
| DNFDC088      | Nonsense           | 0.84                        | 0.84                        |
| DNFDC103      | Nonsense           | 0.17                        | 0.17                        |
| DNFDC142      | Nonsense           | 0.00                        | 0.00                        |
| TSFDC002      | Nonsense           | 0.59                        | 0.59                        |
| TSFDC017      | Frameshift         | 0.00                        | 0.00                        |
| TSFDC033      | Frameshift         | 0.17                        | 0.17                        |
| TSFDC050      | Nonsense           | 0.30                        | 0.30                        |
| TSSDC019      | Nonsense           | 0.00                        | 0.00                        |
| MHX           | Nonsense           | 1.14                        | 0.96                        |
| MDD           | Splice             | 0.17                        | 0.17                        |
| MIV           | Splice             | 1.47                        | 1.40                        |
| MIS           | Splice             | 0.14                        | 0.09                        |
|               | total              | 11.1                        | 10.3                        |

\*LOD score for each family calculated at  $\theta=0$  and indicated penetrance. Pedigrees and clinical data are provided in Supplementary Fig. 1 and Table 13. See Methods for details on the assignment of affection status.

**Supplementary Appendix Table 14** Previously published *TTN* truncation mutations\*

| AA position | NT name                     | AA name      | Mutation Type | Genotype <sup>^</sup> | Diagnosis                        | Source                       |
|-------------|-----------------------------|--------------|---------------|-----------------------|----------------------------------|------------------------------|
| 2484        | c.7450G>A                   | p.Gln2484X   | nonsense      | Hetero                | Cancer                           | Greenman 2007 <sup>20</sup>  |
| 4053        | c.12156C>T                  | p.Gln4053X   | nonsense      | Hetero                | Heart failure                    | Itoh-Satoh 2002              |
| 15465       | c.46395C>T                  | p.Trp15465X  | nonsense      | Somatic               | Cancer                           | Greenman 2007 <sup>20</sup>  |
| 15700       | c.47098G>A                  | p.Arg15700X  | nonsense      | Somatic               | Cancer                           | Greenman 2007 <sup>20</sup>  |
| 21924       | c.65766_65767insAT          | p.Thr21924fs | frameshift    | Hetero                | DCM                              | Gerull 2002 <sup>1</sup>     |
| 28388       | c.85161delG                 | p.Glu28388fs | frameshift    | Hetero                | DCM                              | Gerull 2006 <sup>21</sup>    |
| 33534       | c.100601_100608 delACCAAGTG | p.His33534fs | frameshift    | Homo                  | Congenital Myopathy              | Carmignac 2007 <sup>22</sup> |
| 33915       | c.101744delA                | p.Lys33915fs | frameshift    | Homo                  | Congenital Myopathy              | Carmignac 2007 <sup>22</sup> |
| 34242       | c.102723delT                | p.Ser34242fs | frameshift    | Hetero                | Severe tibial muscular dystrophy | Hackman 2008 <sup>23</sup>   |
| 34322       | c.102965delA                | p.Lys34322fs | frameshift    | Hetero                | Severe tibial muscular dystrophy | Hackman 2008 <sup>23</sup>   |
| 34323       | c.102967G>A                 | p.Gln4322X   | nonsense      | Hetero                | Severe tibial muscular dystrophy | Hackman 2008 <sup>23</sup>   |

\*Positions are for UniProt titin (Q8WZ42); <sup>^</sup> Subjects are reported to have germline (hetero, heterozygous or homo, homozygous) or somatic *TTN* mutations.

**Supplementary Appendix Table 15:** *TTN* exons comprising the standard UniProt titin protein (Q8WZ42) that have minimal or no evidence for cardiac expression

| Chrom | hg19 start  | hg19 end    | Q8WZ42 start | Q8WZ42 end |
|-------|-------------|-------------|--------------|------------|
| 2     | 179,535,817 | 179,537,208 | 11245        | 11396      |
| 2     | 179,540,648 | 179,542,644 | 11029        | 11139      |
| 2     | 179,544,066 | 179,545,898 | 10766        | 10931      |
| 2     | 179,549,057 | 179,549,716 | 10507        | 10591      |

## Supplementary Appendix Figure Legends

**Supplementary Appendix Figure 1:** Kaplan-Meier curves displaying (A) age of clinical diagnosis and (B) freedom cardiac transplantation, ventricular assist device and/or death among subjects with DCM from group A (black lines), group B (blue lines) and group C (red lines).

**Supplementary Appendix Figure 2:** Pedigrees of families with *TTN* truncation mutations. Probands (arrow) and family members are from group A or group C of the DCM cohort. Clinical status defined by cardiac evaluations and/or medical records is indicated: black, DCM; white, unaffected; grey, status uncertain due to age  $\leq 40$  years, and/or confounding cardiac diagnoses; slash, deceased. Genotypes (+, *TTN* mutation present; -, mutation absent) are indicated.

**Supplementary Appendix Figure 3:** Confirmation that *TTN* mutation (c.44725+2delT) disrupts normal splicing. The consequences of a single A/T basepair deletion at chr2:179477886 (identified in genomic DNA from subject MIV-14) on splicing was assessed by sequencing RNA from the subject's explanted left ventricular tissue. (A): IGV (Integrated Genomics View) screenshot of ~950 bp of genomic sequence from subject MIV-14. Eight read are displayed. Among the 188 50-basepair reads aligned at residue chr2:179477886, 98 reads predicted the A/T deletion (Supplementary Appendix Tables 4, 6). (B) IGV screenshot of aligned sequences derived from RNA sequence of left ventricular tissue. Reads were aligned using TOPHAT. A BAM file of RNA sequences corresponding to genomic region in A is displayed. Ten of 11 sequences

show normal RNA splicing. One read (denoted as exon skip) omitted exon 204. Six other reads that were not aligned by TOPHAT (not shown) also indicate abnormal splicing. (C) IGV screenshot of TTN exons and introns in the 950 bp region flanking chr2:179477886. Note that normal splicing (indicated in panel B) includes exon 204. Primers (denoted pF and pR) designed to correspond to sequences in exon 203 and 205 are:

pF:CCATCATGTTCTGGTTTTGTCCAATTCAACCTTACT and pR:

CAATCACAGGATACTGGGTTGAAAGACTGGA. (D) MIV-14 RNA was RT-PCR amplified using primer pF and pR and size fractionated by gel electrophoresis (3% agarose).

Lanes (left to right) are: 50bp ladder, control A, control B, and MIV14. PCR products corresponding to WT-splicing and MIV-14 exon skip splicing were analyzed by dideoxy sequencing (data not shown).

**Supplementary Appendix Figure 4:** *TTN* copy-number analysis. The color of each box represents the log base-2 copy-ratio of a subject's target amplicon. Copy-ratios are iteratively median-normalized by amplicon and subject

**Supplementary Appendix Figure 5:** Confirmation of a large *TTN* tandem-insertion in MEQ-132. Primer pairs TTN\_21\_3F and TTN\_21\_3R (amplicon TTN\_21), TTN\_155F and TTN\_155R (amplicon TTN\_155), and TTN\_37+intF1 and TTN\_i22\_R1 (predicted break-point) were used for PCR amplification of genomic DNA from proband MEQ-132, unaffected relatives (MEQ-130, MEQ-131) and an unrelated control sample (CTL). The lane denoted by '-' contained no genomic DNA. The predicted size of the PCR product

was 292 bp.

**Supplementary Appendix Figure 6:** Transmission electron micrograph of a cardiac left ventricular free wall specimen, derived at autopsy, from DCM-A subject MGW-11 who carries a TTN nonsense mutation (p.Arg26949X). Sarcomere structure is normal. The myocyte nucleus is highly lobulated.

## Supplementary Appendix References

1. Gerull B, Gramlich M, Atherton J, et al. Mutations of TTN, encoding the giant muscle filament titin, cause familial dilated cardiomyopathy. *Nat Genet* 2002;30:201-4.
2. Schmitt JP, Kamisago M, Asahi M, et al. Dilated cardiomyopathy and heart failure caused by a mutation in phospholamban. *Science* 2003;299:1410-3.
3. Schonberger J, Wang L, Shin JT, et al. Mutation in the transcriptional coactivator EYA4 causes dilated cardiomyopathy and sensorineural hearing loss. *Nat Genet* 2005;37:418-22.
4. Lakdawala NK, Dellefave L, Redwood CS, et al. Familial dilated cardiomyopathy caused by an alpha-tropomyosin mutation: the distinctive natural history of sarcomeric dilated cardiomyopathy. *J Am Coll Cardiol*;55:320-9.
5. Fatkin D, MacRae C, Sasaki T, et al. Missense mutations in the rod domain of the lamin A/C gene as causes of dilated cardiomyopathy and conduction-system disease. *N Engl J Med* 1999;341:1715-24.
6. Kamisago M, Sharma SD, DePalma SR, et al. Mutations in sarcomere protein genes as a cause of dilated cardiomyopathy. *N Engl J Med* 2000;343:1688-96.
7. Taylor MR, Fain PR, Sinagra G, et al. Natural history of dilated cardiomyopathy due to lamin A/C gene mutations. *J Am Coll Cardiol* 2003;41:771-80.
8. Carniel E, Taylor MR, Sinagra G, et al. Alpha-myosin heavy chain: a sarcomeric gene associated with dilated and hypertrophic phenotypes of cardiomyopathy. *Circulation* 2005;112:54-9.
9. Taylor MR, Slavov D, Gajewski A, et al. Thymopoietin (lamina-associated polypeptide 2) gene mutation associated with dilated cardiomyopathy. *Hum Mutat* 2005;26:566-74.
10. Taylor MR, Slavov D, Ku L, et al. Prevalence of desmin mutations in dilated cardiomyopathy. *Circulation* 2007;115:1244-51.
11. Mestroni L, Maisch B, McKenna WJ, et al. Guidelines for the study of familial dilated cardiomyopathies. Collaborative Research Group of the European Human and Capital Mobility Project on Familial Dilated Cardiomyopathy. *Eur Heart J* 1999;20:93-102.
12. Maron BJ, McKenna WJ, Danielson GK, et al. American College of Cardiology/European Society of Cardiology clinical expert consensus document on hypertrophic cardiomyopathy. A report of the American College of Cardiology Foundation Task Force on Clinical Expert Consensus Documents and the European Society of Cardiology Committee for Practice Guidelines. *J Am Coll Cardiol* 2003;42:1687-713.
13. Lathrop GM, Lalouel JM. Easy calculations of lod scores and genetic risks on small computers. *Am J Hum Genet* 1984;36:460-5.
14. Herman DS, Hovingh GK, Iartchouk O, et al. Filter-based hybridization capture of subgenomes enables resequencing and copy-number detection. *Nat Methods* 2009;6:507-10.
15. McKenna A, Hanna M, Banks E, et al. The Genome Analysis Toolkit: a MapReduce framework for analyzing next-generation DNA sequencing data. *Genome Res* 2011;20:1297-303.

16. Integrated Genomics Viewer. Broad Institute, 2011. (Accessed at
17. Yeo G, Burge CB. Maximum entropy modeling of short sequence motifs with applications to RNA splicing signals. *J Comput Biol* 2004;11:377-94.
18. 1000 Genomes: A Deep Catalog of Human Genetic Variation. 2011. (Accessed at <http://www.1000genomes.org/>.)
19. Consortium\_TGP. A map of human genome variation from population-scale sequencing. *Nature* 2010;467:1061-73.
20. Greenman C, Stephens P, Smith R, et al. Patterns of somatic mutation in human cancer genomes. *Nature* 2007;446:153-8.
21. Gerull B, Atherton J, Geupel A, et al. Identification of a novel frameshift mutation in the giant muscle filament titin in a large Australian family with dilated cardiomyopathy. *J Mol Med* 2006;84:478-83.22.
22. Carmignac V, Salih MA, Quijano-Roy S, et al. C-terminal titin deletions cause a novel early-onset myopathy with fatal cardiomyopathy. *Ann Neurol* 2007;61:340-51.
23. Hackman P, Marchand S, Sarparanta J, et al. Truncating mutations in C-terminal titin may cause more severe tibial muscular dystrophy (TMD). *Neuromuscul Disord* 2008;18:922-8.

### A Age at Diagnosis

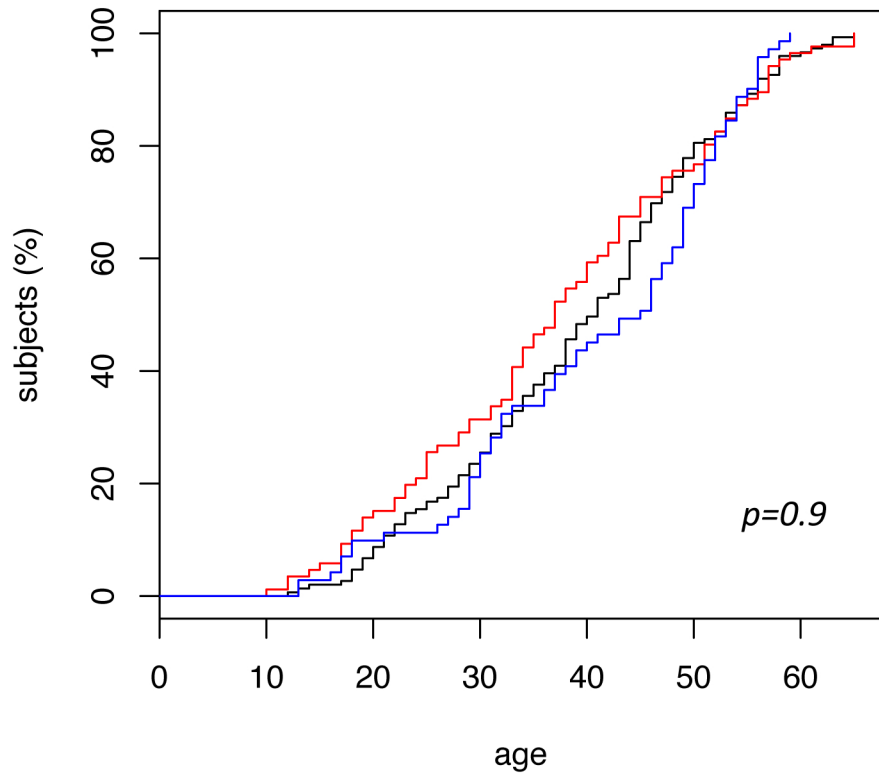

### B Freedom from Adverse Events

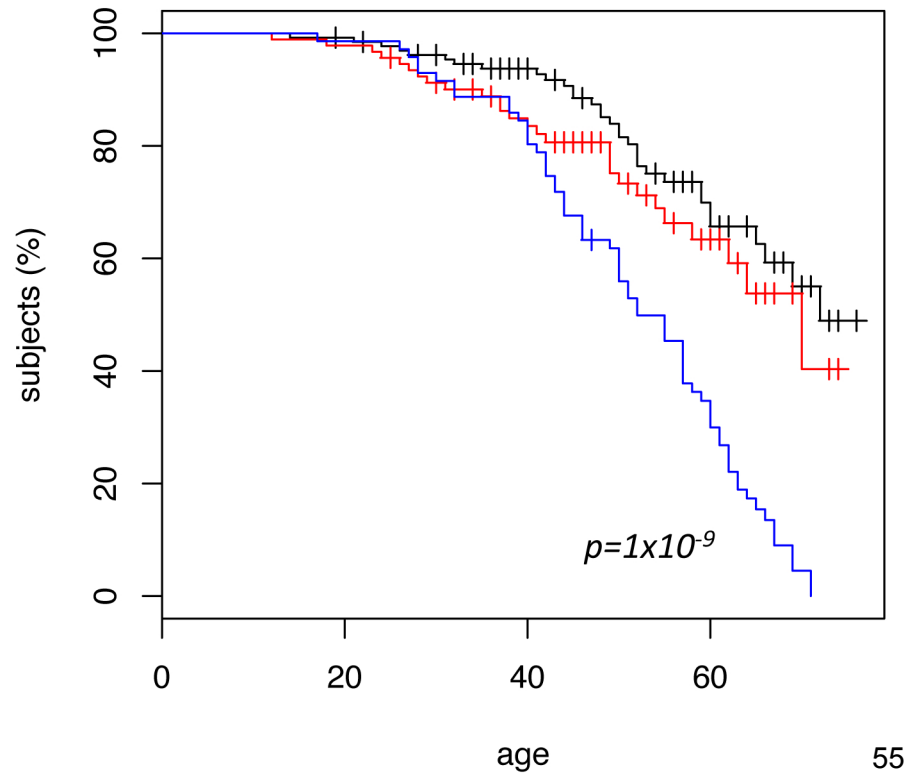



Supplementary Appendix Figure 2

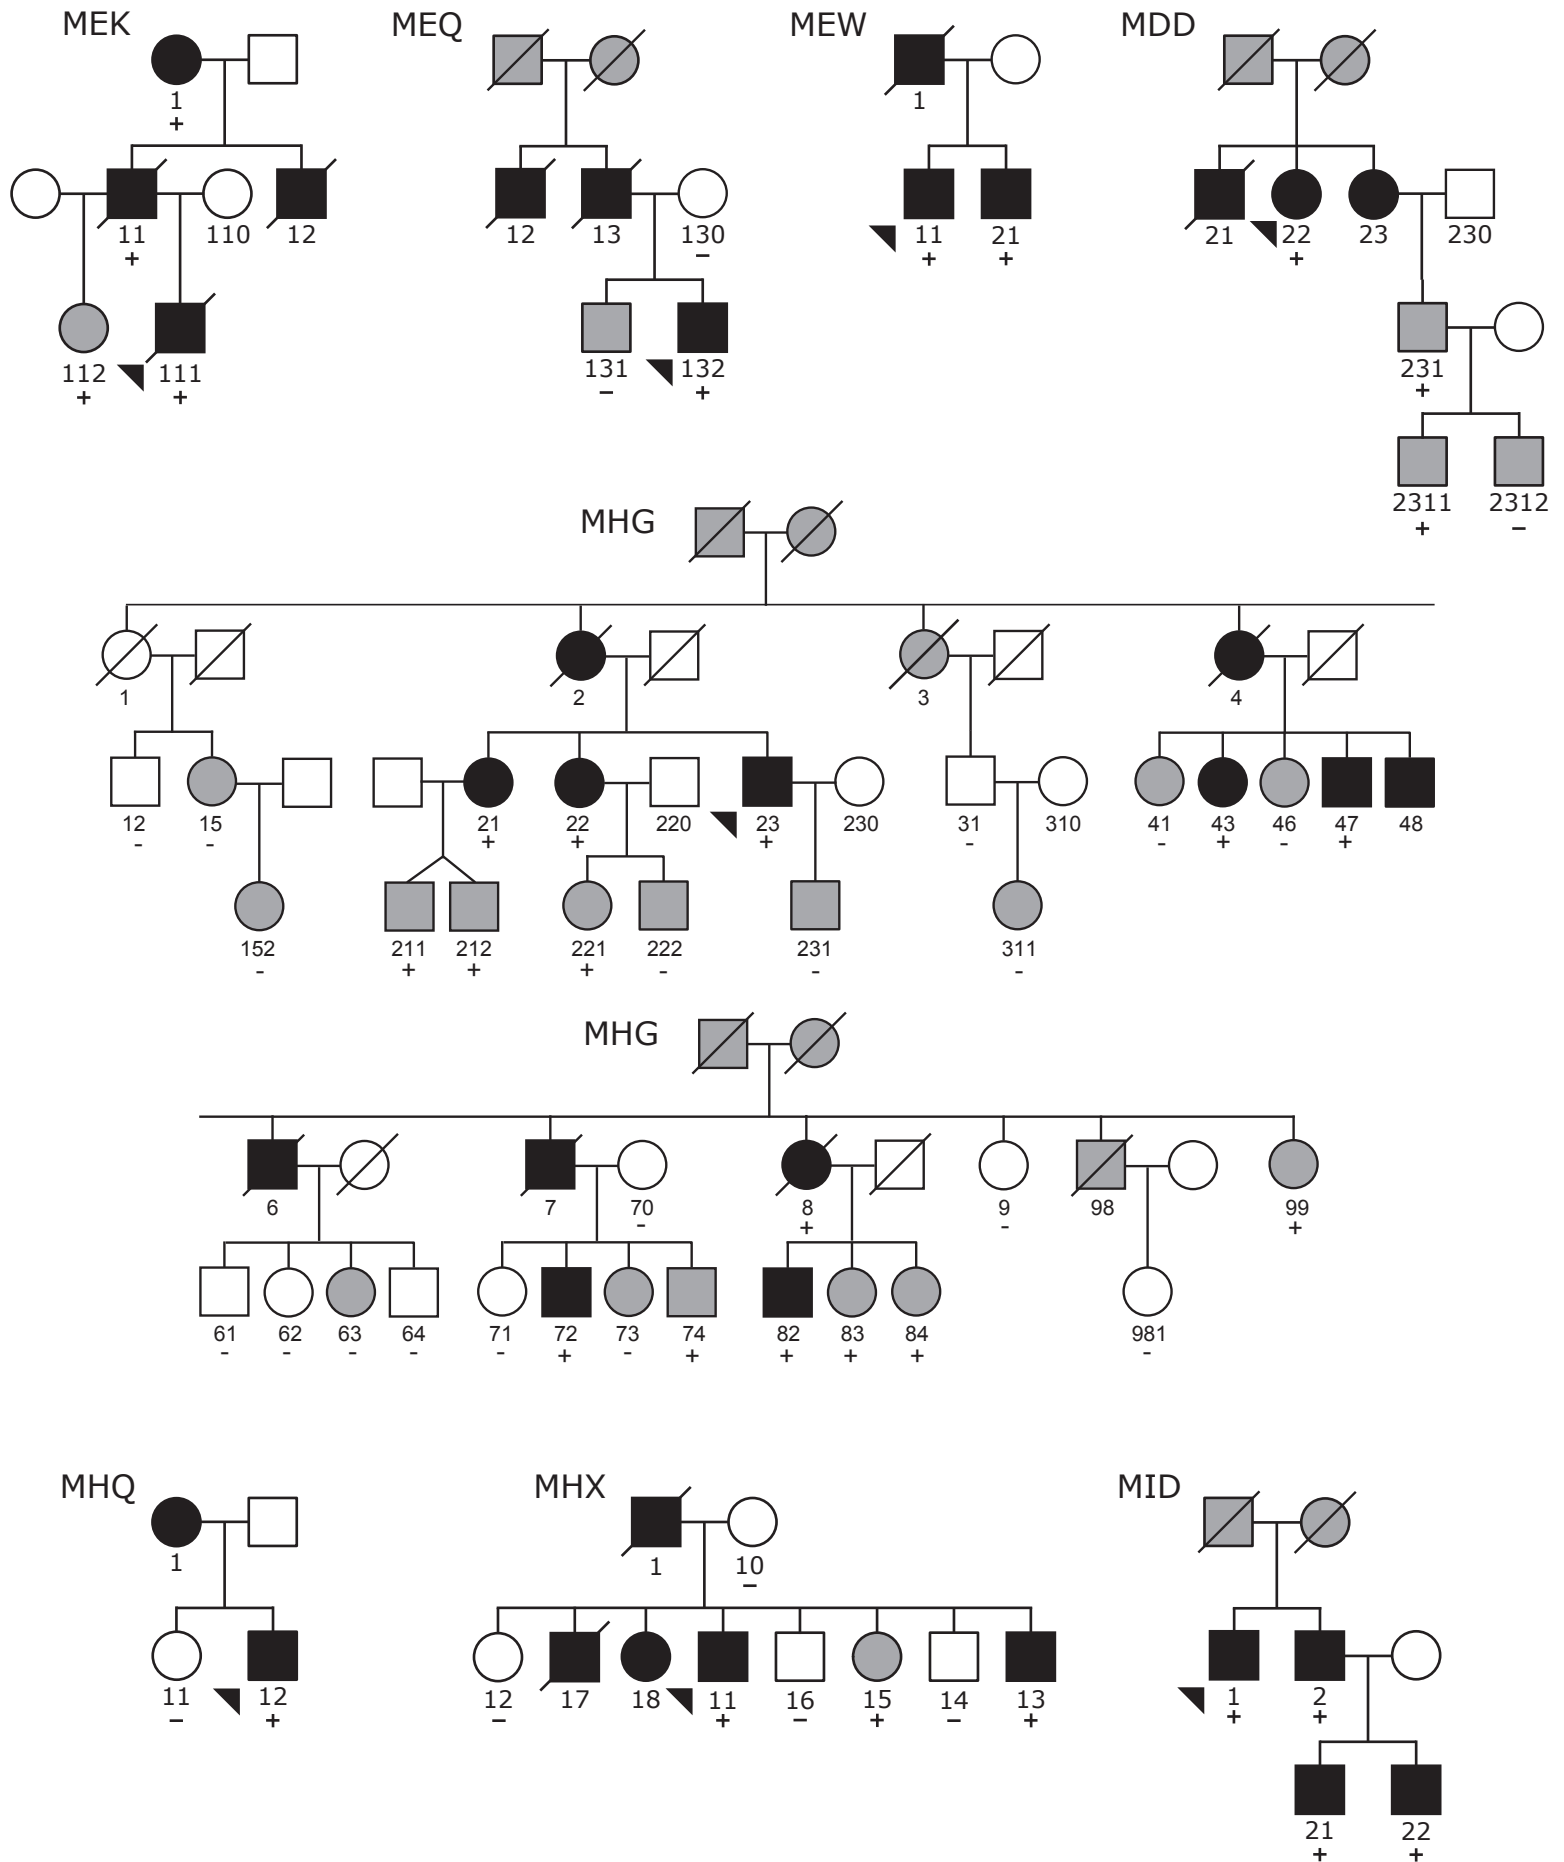

Supplementary Appendix Figure 2 (continued)

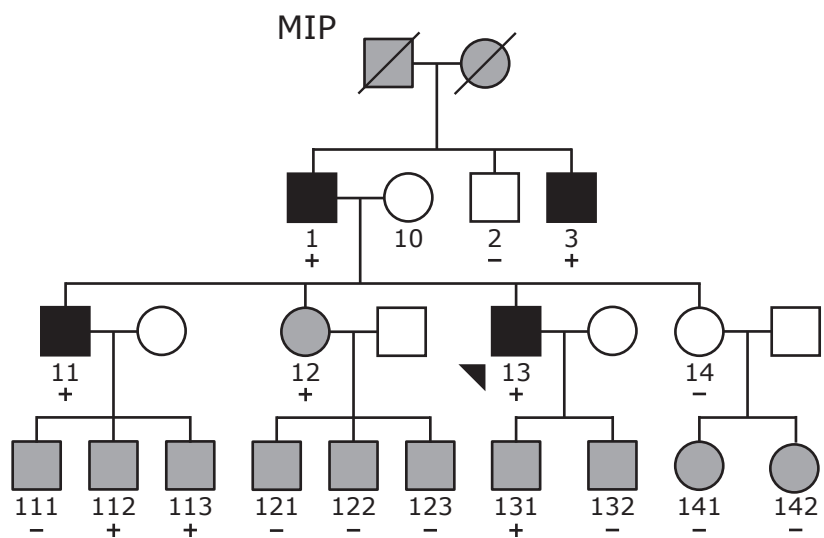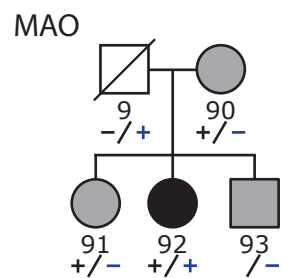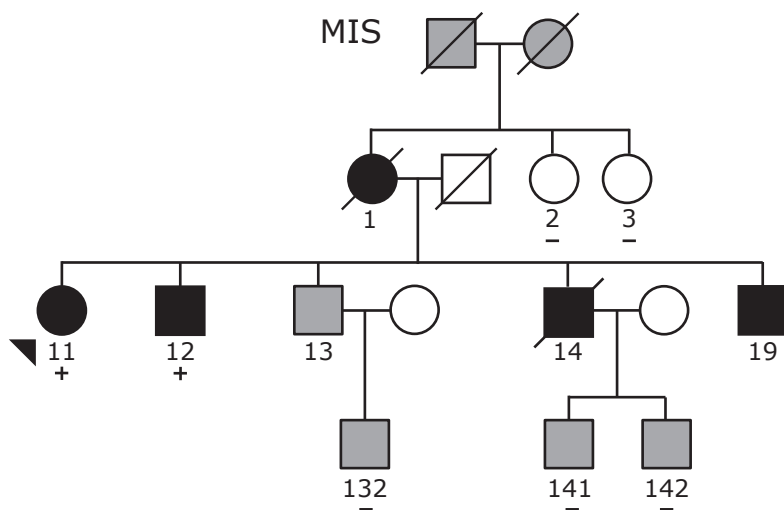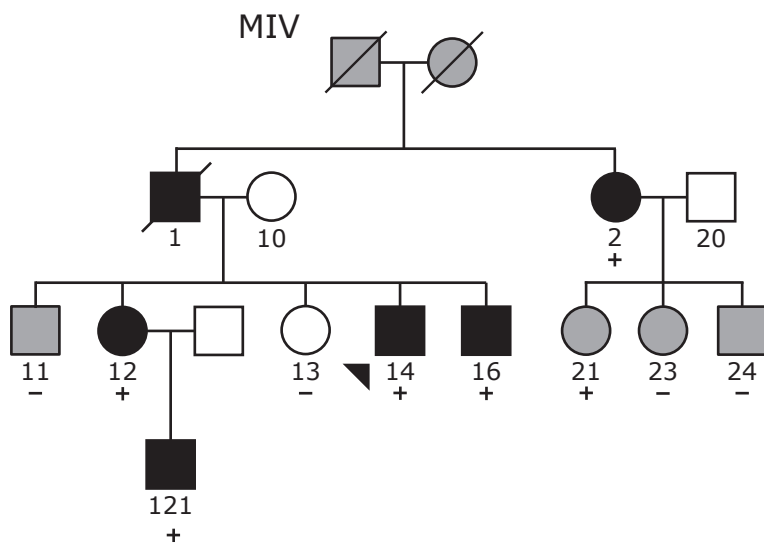

DNFDC081

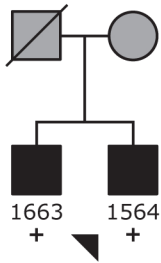

DNFDC088

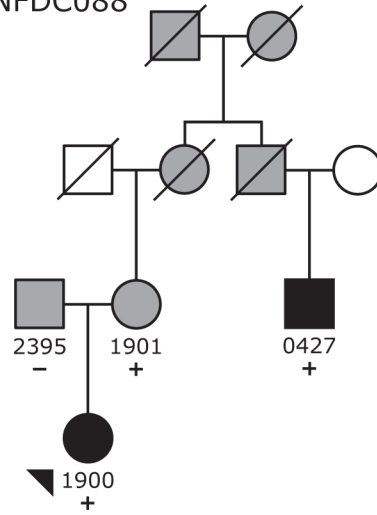

DNFDC103

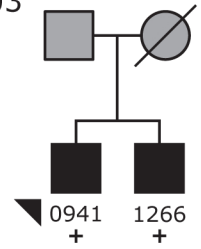

DNFDC142

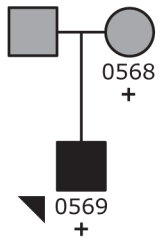

TSFDC002

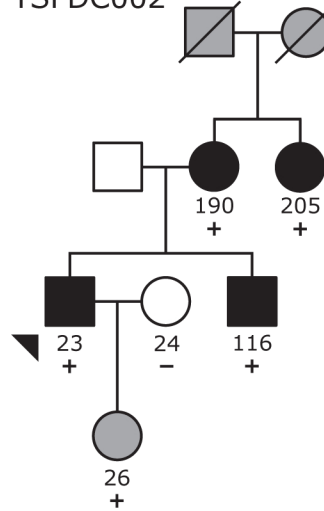

TSFDC017

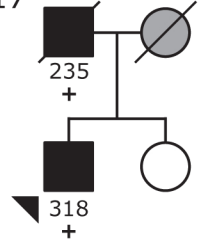

TSFDC033

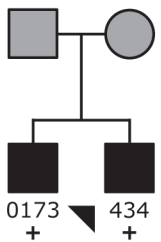

TSFDC050

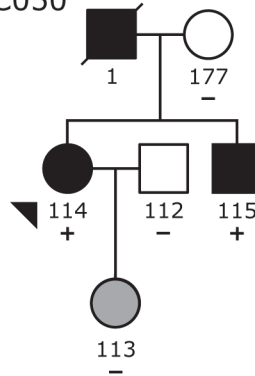

deletion A (chr2:179477886)

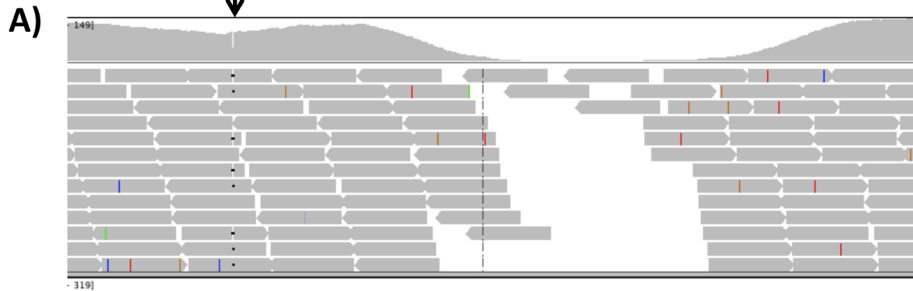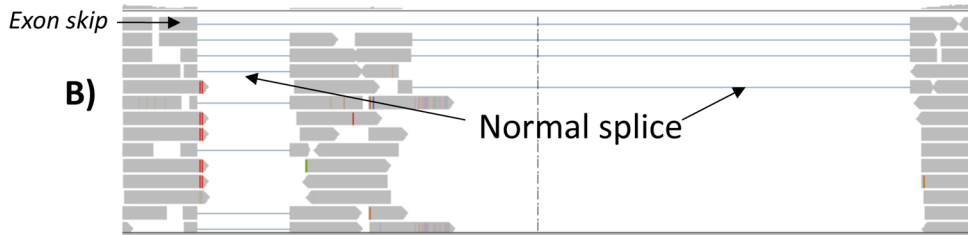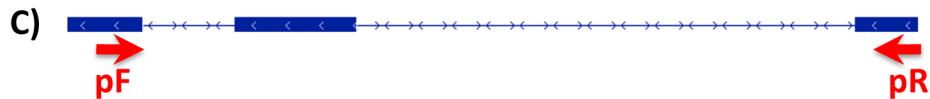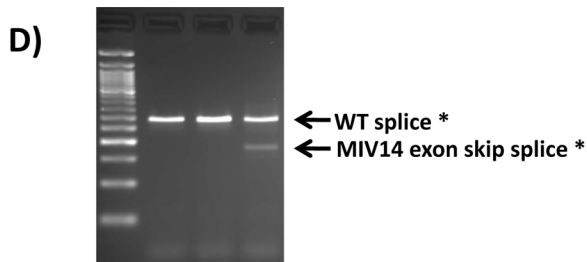

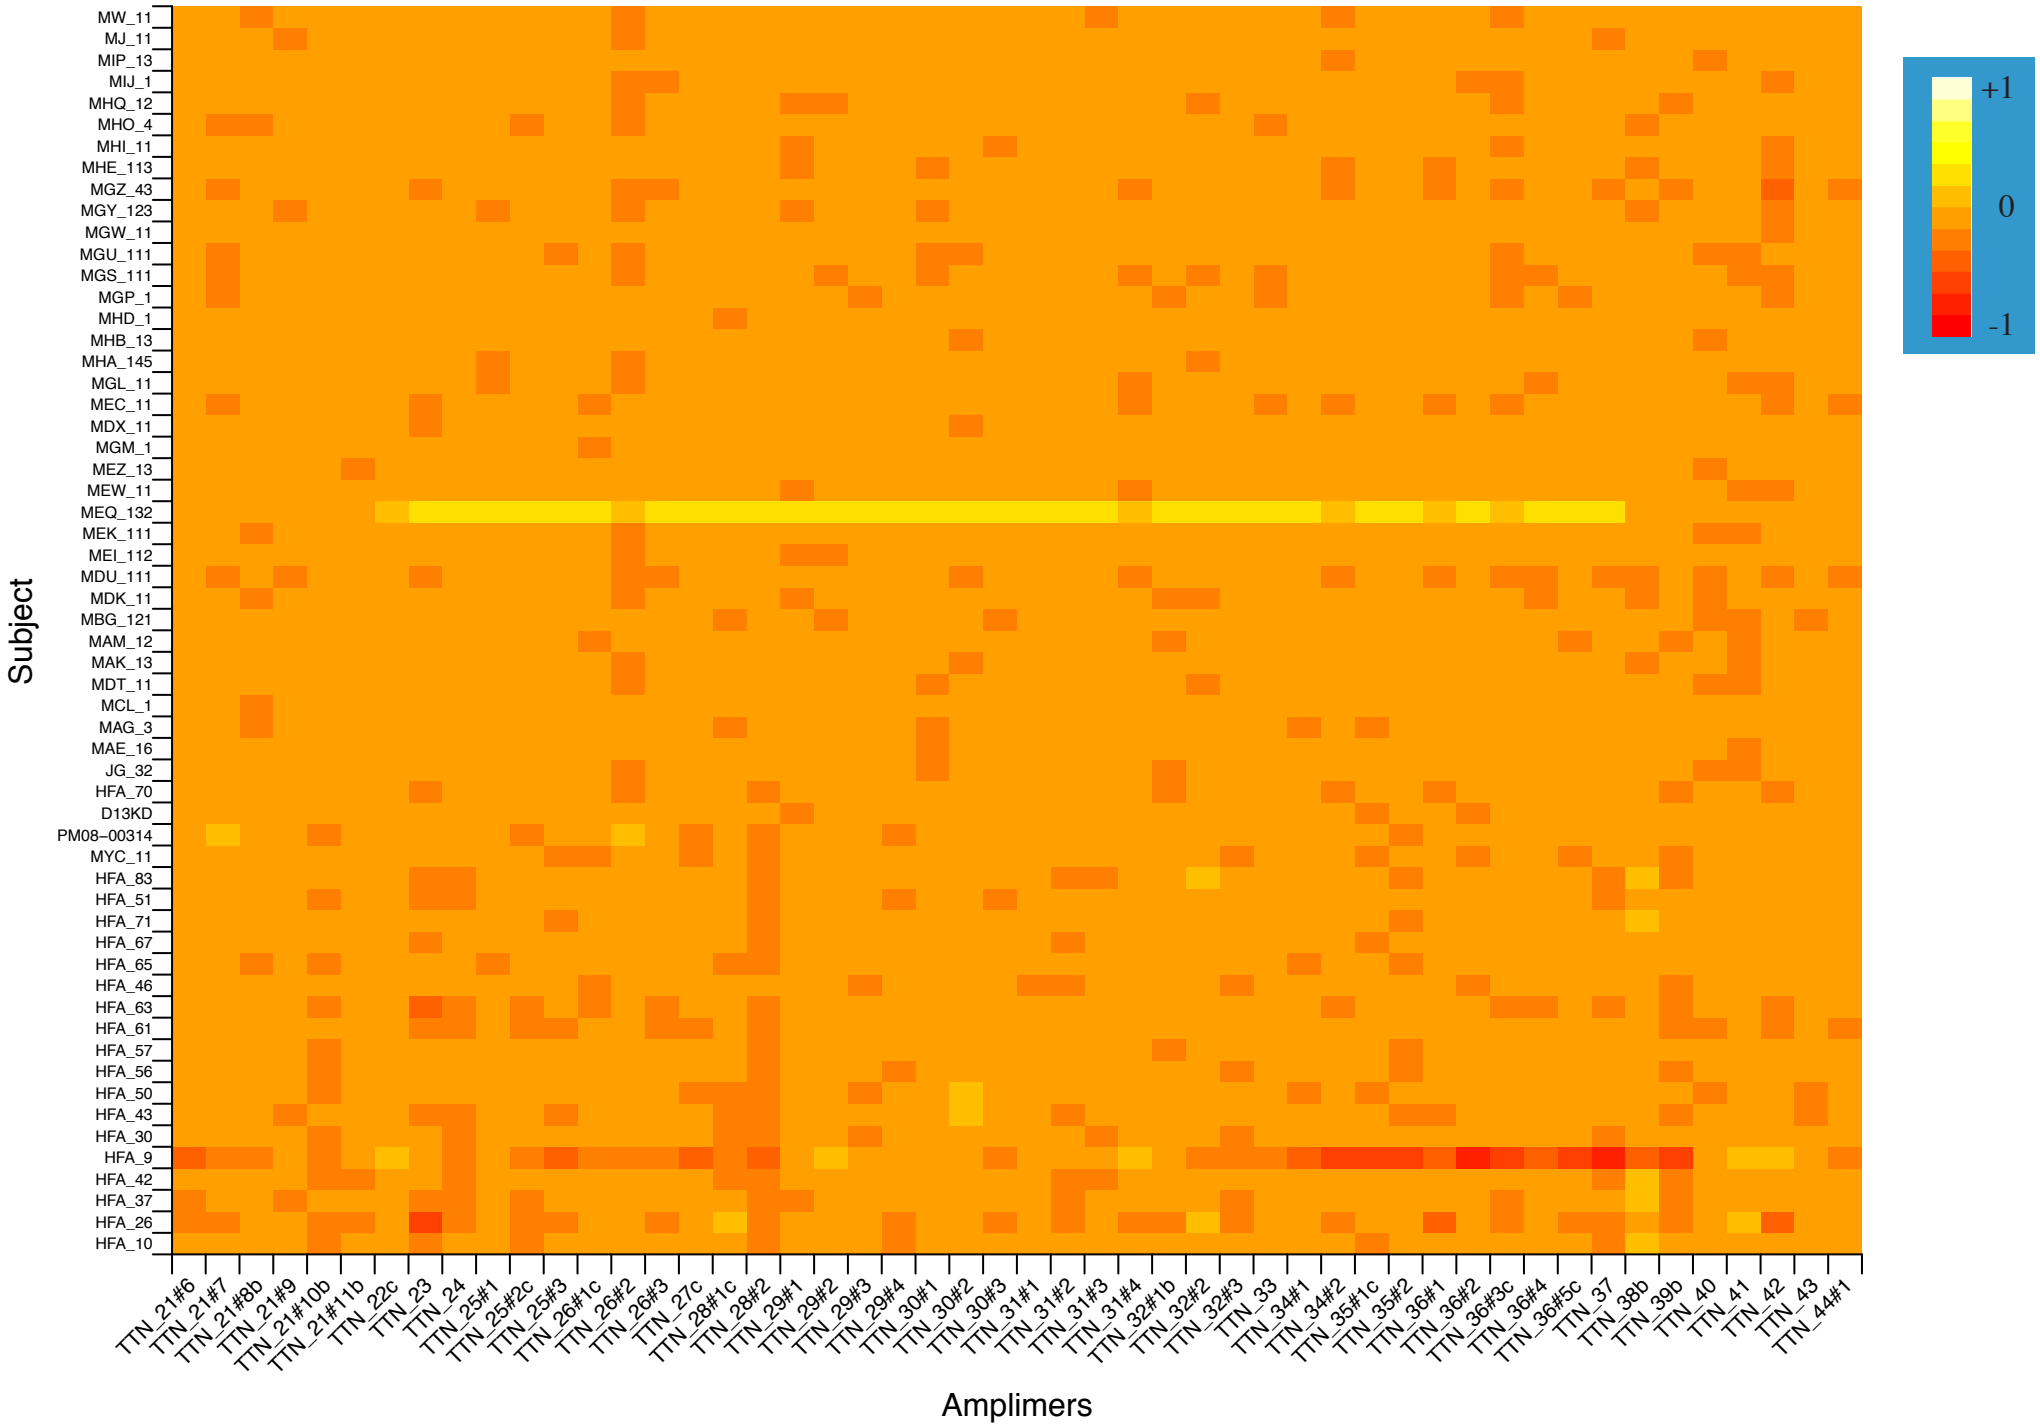

Supplementary Appendix Figure 5

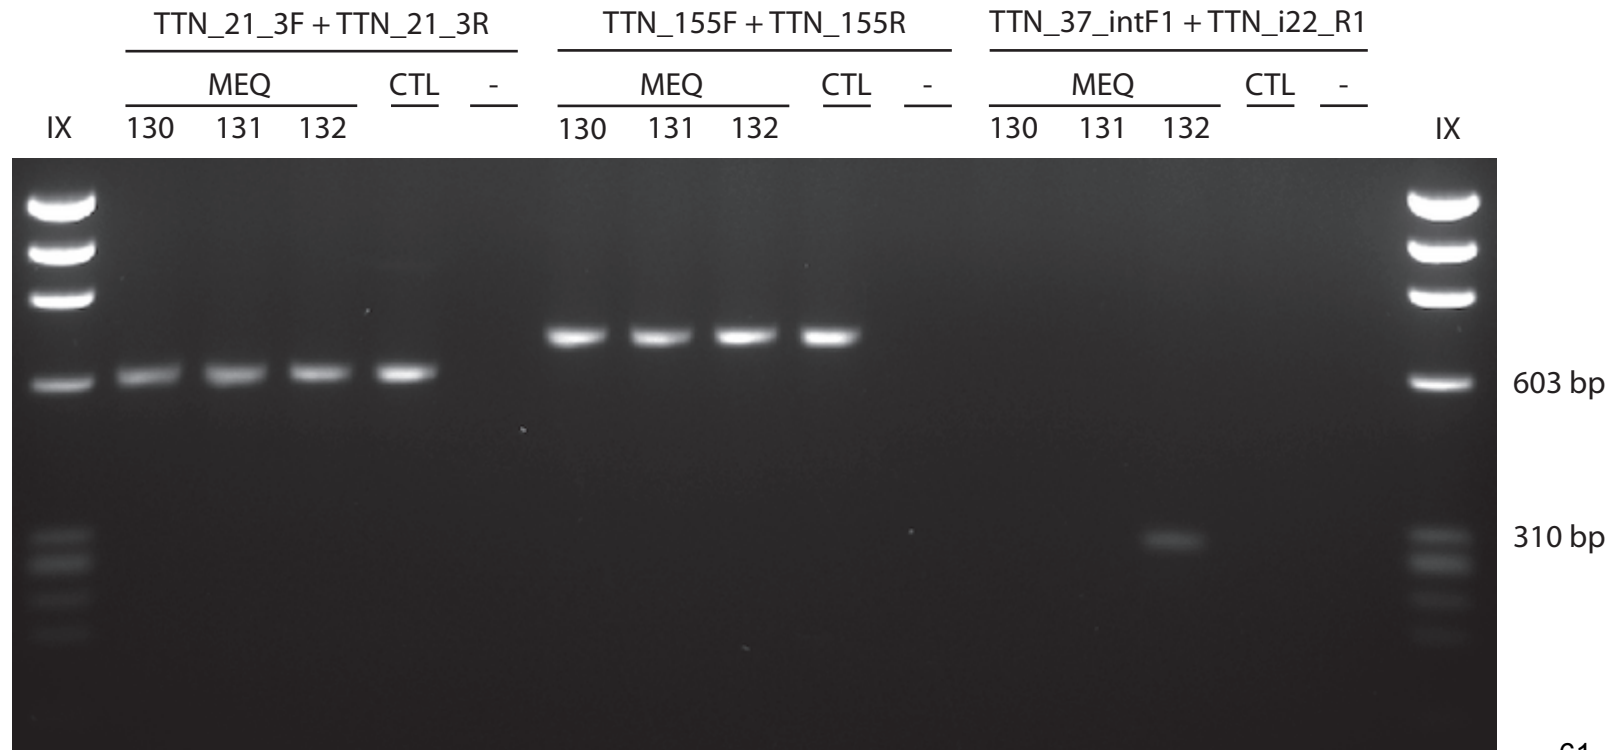

Supplementary Appendix Figure 6

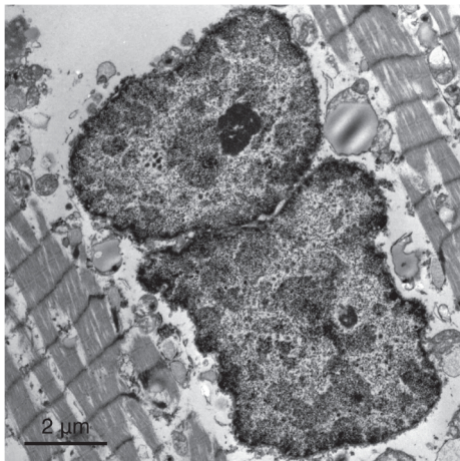

Supplement: NIHMS464153-supplement-Supplement1.pdf [file NIHMS464153-supplement-Supplement1.pdf]
